# Supplementary material for: The surface phase structure evolution of the fcc MoC (001) surface in a steam reforming atmosphere: systematic kinetic and thermodynamic investigations
Source: Royal Society of Chemistry journal article supplement (doi:10.1039/d1cy01554k), 2021-12-30
Supplement: d1cy01554k1.pdf [file d1cy01554k1.pdf]

## Supplementary Information

### Surface phase structure evolution of the fcc MoC (001) surface in steam reforming atmosphere: systematic kinetic and thermodynamic investigations

Changqing Chu,<sup>\*ab</sup> Chao Li,<sup>cd</sup> Xue Liu,<sup>c</sup> Hang Zhao,<sup>c</sup> Changning Wu,<sup>b</sup> Junguo Li,<sup>b</sup> Ke Liu\*,<sup>bc</sup> Qi Li<sup>e</sup> and Daofan Cao\*<sup>f</sup>

---

<sup>a</sup> Qingdao Univ Sci & Technol, Inst Climate Change & Energy Sustainable Dev, Qingdao 266061, Peoples R China E-mail: [chuca@sustech.edu.cn](mailto:chuca@sustech.edu.cn)

<sup>b</sup> Academy for Advanced Interdisciplinary Studies, Southern University of Science and Technology, 1088 Xueyuan Avenue, Shenzhen 518055, P.R. China. E-mail: [chuca@sustech.edu.cn](mailto:chuca@sustech.edu.cn)

<sup>c</sup> Department of Chemistry, College of Science, Southern University of Science and Technology, 1088 Xueyuan Avenue, Shenzhen 518055, P.R. China. E-mail: [liuk@sustech.edu.cn](mailto:liuk@sustech.edu.cn)

<sup>d</sup> Harbin Institute of Technology, Harbin, 150080, China.

<sup>e</sup> Shenzhen Gas Corporation Ltd., Shenzhen, 518049, PR China

<sup>f</sup> Birmingham Centre for Energy Storage (BCES) & School of Chemical Engineering, University of Birmingham, UK B15 2TT. E-mail: [dx816@student.bham.ac.uk](mailto:dx816@student.bham.ac.uk)

## List of methods details, Figures and Tables

**S-1.** Detailed description on the elementary reaction rate constant calculation

**S-2.** Detailed description on the *ab initio* thermodynamic method

**Fig. S1** The potential energy profiles with ZPE correction for H<sub>2</sub>O\* dissociation at different H<sub>2</sub>O\* coverage (For each H<sub>2</sub>O\* coverage, more than one site for H<sub>2</sub>O dissociation may be considered, energies in eV with gas phase H<sub>2</sub>O and H<sub>2</sub> as reference)

**Fig. S2** The potential energy profiles with ZPE correction for H<sub>2</sub>O\* dissociation at different OH\* coverage (For each OH\* coverage, more than one site for H<sub>2</sub>O dissociation may be considered, energies in eV with gas phase H<sub>2</sub>O and H<sub>2</sub> as reference)

**Fig. S3** The potential energy profiles with ZPE correction for direct deprotonation of single OH\* at different OH\* coverage (Energies in eV with gas phase H<sub>2</sub>O and H<sub>2</sub> as reference)

**Fig. S4** The potential energy profiles with ZPE correction for hydroxyls condensation at different OH\* coverage (Energies in eV with gas phase H<sub>2</sub>O and H<sub>2</sub> as reference)

**Fig. S5** Structure evolution of surface O\* at 1/9 ML coverage with time scale of 1-3700 femtoseconds at temperature of 473.15K. A canonical ensemble with Nosé-Hoover thermostats was employed in the *ab initio* molecular dynamics (AIMD), and the time step was set to 1 fs.

**Fig. S6** The potential energy profiles with ZPE correction for H-H bond breaking and H transfer at different H<sub>2</sub>\* coverage. Energies in eV with gas phase H<sub>2</sub>O and H<sub>2</sub> as reference.

**Fig. S7** The potential energy profiles with ZPE correction for H-H bond breaking at different H\* coverage. Energies in eV with gas phase H<sub>2</sub>O and H<sub>2</sub> as reference.

**Fig. S8** Configurations of H<sub>2</sub> adsorption, values in the parentheses from left to right represent average binding energies of H<sub>2</sub> ( $E_{\text{AVG},n}^{\text{H}_2\text{O}}$ ,  $n = 1-9$ ), surface oxidation degree of Mo sites ( $\text{OX}_{\text{Mo}}$ ) and surface oxidation degree of C sites ( $\text{OX}_{\text{C}}$ ) at different coverage (1/9 – 1 ML, based on number of surface Mo sites) on fcc MoC (001) surface, respectively. Gaseous H<sub>2</sub> as energy reference.

**Fig. S9** Configurations of H\* species, values in the parentheses from left to right represent average binding energies of H<sub>2</sub> ( $E_{\text{AVG},n}^{\text{H}_2\text{O}}$ ,  $n = 1-9$ ), surface oxidation degree of Mo sites ( $\text{OX}_{\text{Mo}}$ ) and surface oxidation degree of C sites ( $\text{OX}_{\text{C}}$ ) at different coverage (1/9 – 1 ML, based on number of surface C and Mo sites, respectively) on fcc MoC (001) surface, respectively. Gaseous H<sub>2</sub> as energy reference.

**Fig. S10** Configurations of H<sub>2</sub>O\* (1/9 ML, based on number of surface Mo sites) and surface binding energy without ZPE correction. Gas phase H<sub>2</sub>O and H<sub>2</sub> as reference

**Fig. S11** Configurations of H<sub>2</sub>O\* (2/9 ML, based on number of surface Mo sites) and surface binding energy without ZPE correction. Gas phase H<sub>2</sub>O and H<sub>2</sub> as reference

**Fig. S12** Configurations of H<sub>2</sub>O\* (1/3 ML, based on number of surface Mo sites) and surface binding energy without ZPE correction. Gas phase H<sub>2</sub>O and H<sub>2</sub> as reference

**Fig. S13** Configurations of H<sub>2</sub>O\* (4/9 ML, based on number of surface Mo sites) and surface binding energy without ZPE correction. Gas phase H<sub>2</sub>O and H<sub>2</sub> as reference

**Fig. S14** Configurations of H<sub>2</sub>O\* (5/9 ML, based on number of surface Mo sites) and surface binding energy without ZPE correction. Gas phase H<sub>2</sub>O and H<sub>2</sub> as reference

**Fig. S15** Configurations of H<sub>2</sub>O\* (2/3 ML, based on number of surface Mo sites) and surface binding energy without ZPE correction. Gas phase H<sub>2</sub>O and H<sub>2</sub> as reference

**Fig. S16** Configurations of H<sub>2</sub>O\* (7/9 ML, based on number of surface Mo sites) and surface binding energy without ZPE correction. Gas phase H<sub>2</sub>O and H<sub>2</sub> as reference



**Fig. S39** Configurations of H\* (1/3 ML, based on number of surface Mo sites) and surface binding energy without ZPE correction. Gas phase H<sub>2</sub>O and H<sub>2</sub> as reference

**Fig. S40** Configurations of H\* (4/9 ML, based on number of surface Mo sites) and surface binding energy without ZPE correction. Gas phase H<sub>2</sub>O and H<sub>2</sub> as reference

**Fig. S41** Configurations of H\* (5/9 ML, based on number of surface Mo sites) and surface binding energy without ZPE correction. Gas phase H<sub>2</sub>O and H<sub>2</sub> as reference

**Fig. S42** Configurations of H\* (2/3 ML, based on number of surface Mo sites) and surface binding energy without ZPE correction. Gas phase H<sub>2</sub>O and H<sub>2</sub> as reference

**Fig. S43** Configurations of H\* (7/9 ML, based on number of surface Mo sites) and surface binding energy without ZPE correction. Gas phase H<sub>2</sub>O and H<sub>2</sub> as reference

**Fig. S44** Configurations of H\* (8/9 ML, based on number of surface Mo sites) and surface binding energy without ZPE correction. Gas phase H<sub>2</sub>O and H<sub>2</sub> as reference

**Fig. S45** Configurations of H\* (1 ML, based on number of surface Mo sites) and surface binding energy without ZPE correction. Gas phase H<sub>2</sub>O and H<sub>2</sub> as reference

**Fig. S46** Configurations of 8OH\_1H<sub>2</sub>O (mixed 8/9 ML OH and 1/9 ML H<sub>2</sub>O) and surface energies without ZPE correction. Gas phase H<sub>2</sub>O and H<sub>2</sub> as reference

**Fig. S47** Configurations of 7OH\_2H<sub>2</sub>O (mixed 7/9 ML OH and 2/9 ML H<sub>2</sub>O) and surface energies without ZPE correction. Gas phase H<sub>2</sub>O and H<sub>2</sub> as reference

**Fig. S48** Configurations of 6OH\_3H<sub>2</sub>O (mixed 2/3 ML OH and 1/3 ML H<sub>2</sub>O) and surface energies without ZPE correction. Gas phase H<sub>2</sub>O and H<sub>2</sub> as reference

**Fig. S49** Configurations of 5OH\_4H<sub>2</sub>O (mixed 5/9 ML OH and 4/9 ML H<sub>2</sub>O) and surface energies without ZPE correction. Gas phase H<sub>2</sub>O and H<sub>2</sub> as reference

**Fig. S50** Configurations of 4OH\_5H<sub>2</sub>O (mixed 4/9 ML OH and 5/9 ML H<sub>2</sub>O) and surface energies without ZPE correction. Gas phase H<sub>2</sub>O and H<sub>2</sub> as reference

**Fig. S51** Configurations of 3OH\_6H<sub>2</sub>O (mixed 1/3 ML OH and 2/3 ML H<sub>2</sub>O) and surface energies without ZPE correction. Gas phase H<sub>2</sub>O and H<sub>2</sub> as reference

**Fig. S52** Configurations of 2OH\_7H<sub>2</sub>O (mixed 2/9 ML OH and 7/9 ML H<sub>2</sub>O) and surface energies without ZPE correction. Gas phase H<sub>2</sub>O and H<sub>2</sub> as reference

**Fig. S53** Configurations of 1OH\_8H<sub>2</sub>O (mixed 1/9 ML OH and 8/9 ML H<sub>2</sub>O) and surface energies without ZPE correction. Gas phase H<sub>2</sub>O and H<sub>2</sub> as reference

**Fig. S54** Configurations of 7OH\_1H<sub>2</sub>O (mixed 7/9 ML OH and 1/9 ML H<sub>2</sub>O) and surface energies without ZPE correction. Gas phase H<sub>2</sub>O and H<sub>2</sub> as reference

**Fig. S55** Configurations of 6OH\_2H<sub>2</sub>O (mixed 2/3 ML OH and 2/9 ML H<sub>2</sub>O) and surface energies without ZPE correction. Gas phase H<sub>2</sub>O and H<sub>2</sub> as reference

**Fig. S56** Configurations of 5OH\_3H<sub>2</sub>O (mixed 5/9 ML OH and 1/3 ML H<sub>2</sub>O) and surface energies without ZPE correction. Gas phase H<sub>2</sub>O and H<sub>2</sub> as reference

**Fig. S57** Configurations of 4OH\_4H<sub>2</sub>O (mixed 4/9 ML OH and 4/9 ML H<sub>2</sub>O) and surface energies without ZPE correction. Gas phase H<sub>2</sub>O and H<sub>2</sub> as reference

**Fig. S58** Configurations of 3OH\_5H<sub>2</sub>O (mixed 1/3 ML OH and 5/9 ML H<sub>2</sub>O) and surface energies without ZPE correction. Gas phase H<sub>2</sub>O and H<sub>2</sub> as reference

**Fig. S59** Configurations of 2OH\_6H<sub>2</sub>O (mixed 2/9 ML OH and 2/3 ML H<sub>2</sub>O) and surface energies without ZPE correction. Gas phase H<sub>2</sub>O and H<sub>2</sub> as reference

**Fig. S60** Configurations of 1OH\_7H<sub>2</sub>O (mixed 1/9 ML OH and 7/9 ML H<sub>2</sub>O) and surface energies without ZPE correction. Gas phase H<sub>2</sub>O and H<sub>2</sub> as reference

**Fig. S61** Configurations of 6OH\_1H<sub>2</sub>O (mixed 2/3 ML OH and 1/9 ML H<sub>2</sub>O) and surface energies without ZPE correction. Gas phase H<sub>2</sub>O and H<sub>2</sub> as reference

**Fig. S62** Configurations of 5OH\_2H<sub>2</sub>O (mixed 5/9 ML OH and 2/9 ML H<sub>2</sub>O) and surface energies without ZPE correction. Gas phase H<sub>2</sub>O and H<sub>2</sub> as reference

**Fig. S63** Configurations of 4OH\_3H<sub>2</sub>O (mixed 4/9 ML OH and 1/3 ML H<sub>2</sub>O) and surface energies without ZPE correction. Gas phase H<sub>2</sub>O and H<sub>2</sub> as reference

**Fig. S64** Configurations of 3OH\_4H<sub>2</sub>O (mixed 1/3 ML OH and 4/9 ML H<sub>2</sub>O) and surface energies without ZPE correction. Gas phase H<sub>2</sub>O and H<sub>2</sub> as reference

**Fig. S65** Configurations of 2OH\_5H<sub>2</sub>O (mixed 2/9 ML OH and 5/9 ML H<sub>2</sub>O) and surface energies without ZPE correction. Gas phase H<sub>2</sub>O and H<sub>2</sub> as reference

**Fig. S66** Configurations of 1OH\_6H<sub>2</sub>O (mixed 1/9 ML OH and 2/3 ML H<sub>2</sub>O) and surface energies without ZPE correction. Gas phase H<sub>2</sub>O and H<sub>2</sub> as reference

**Fig. S67** Configurations of 5OH\_1H<sub>2</sub>O (mixed 5/9 ML OH and 1/9 ML H<sub>2</sub>O) and surface energies without ZPE correction. Gas phase H<sub>2</sub>O and H<sub>2</sub> as reference

**Fig. S68** Configurations of 4OH\_2H<sub>2</sub>O (mixed 4/9 ML OH and 2/9 ML H<sub>2</sub>O) and surface energies without ZPE correction. Gas phase H<sub>2</sub>O and H<sub>2</sub> as reference

**Fig. S69** Configurations of 3OH\_3H<sub>2</sub>O (mixed 1/3 ML OH and 1/3 ML H<sub>2</sub>O) and surface energies without ZPE correction. Gas phase H<sub>2</sub>O and H<sub>2</sub> as reference

**Fig. S70** Configurations of 2OH\_4H<sub>2</sub>O (mixed 2/9 ML OH and 4/9 ML H<sub>2</sub>O) and surface energies without ZPE correction. Gas phase H<sub>2</sub>O and H<sub>2</sub> as reference

**Fig. S71** Configurations of 1OH\_5H<sub>2</sub>O (mixed 1/9 ML OH and 5/9 ML H<sub>2</sub>O) and surface energies without ZPE correction. Gas phase H<sub>2</sub>O and H<sub>2</sub> as reference

**Fig. S72** Configurations of 4OH\_1H<sub>2</sub>O (mixed 4/9 ML OH and 1/9 ML H<sub>2</sub>O) and surface energies without ZPE correction. Gas phase H<sub>2</sub>O and H<sub>2</sub> as reference

**Fig. S73** Configurations of 3OH\_2H<sub>2</sub>O (mixed 1/3 ML OH and 2/9 ML H<sub>2</sub>O) and surface energies without ZPE correction. Gas phase H<sub>2</sub>O and H<sub>2</sub> as reference

**Fig. S74** Configurations of 2OH\_3H<sub>2</sub>O (mixed 2/9 ML OH and 1/3 ML H<sub>2</sub>O) and surface energies without ZPE correction. Gas phase H<sub>2</sub>O and H<sub>2</sub> as reference

**Fig. S75** Configurations of 1OH\_4H<sub>2</sub>O (mixed 1/9 ML OH and 4/9 ML H<sub>2</sub>O) and surface energies without ZPE correction. Gas phase H<sub>2</sub>O and H<sub>2</sub> as reference

**Fig. S76** Configurations of 3OH\_1H<sub>2</sub>O (mixed 1/3 ML OH and 1/9 ML H<sub>2</sub>O) and surface energies without ZPE correction. Gas phase H<sub>2</sub>O and H<sub>2</sub> as reference

**Fig. S77** Configurations of 2OH\_2H<sub>2</sub>O (mixed 2/9 ML OH and 2/9 ML H<sub>2</sub>O) and surface energies without ZPE correction. Gas phase H<sub>2</sub>O and H<sub>2</sub> as reference

**Fig. S78** Configurations of 1OH\_3H<sub>2</sub>O (mixed 1/9 ML OH and 1/3 ML H<sub>2</sub>O) and surface energies without ZPE correction. Gas phase H<sub>2</sub>O and H<sub>2</sub> as reference

**Fig. S79** Configurations of 2OH\_1H<sub>2</sub>O (mixed 2/9 ML OH and 1/9 ML H<sub>2</sub>O) and surface energies without ZPE correction. Gas phase H<sub>2</sub>O and H<sub>2</sub> as reference

**Fig. S80** Configurations of 1OH\_2H<sub>2</sub>O (mixed 1/9 ML OH and 2/9 ML H<sub>2</sub>O) and surface energies without ZPE correction. Gas phase H<sub>2</sub>O and H<sub>2</sub> as reference

**Fig. S81** Configurations of 1OH\_1H<sub>2</sub>O (mixed 1/9 ML OH and 1/9 ML H<sub>2</sub>O) and surface energies without ZPE correction. Gas phase H<sub>2</sub>O and H<sub>2</sub> as reference

**Fig. S82** Configurations of 3OH\_5H<sub>2</sub>O\_1O (mixed 1/3 ML OH\*, 5/9 ML H<sub>2</sub>O\* and 1/9 ML O\*) and surface energies without ZPE correction. Gas phase H<sub>2</sub>O and H<sub>2</sub> as reference

**Fig. S83** Configurations of 4OH\_4H<sub>2</sub>O\_1O (mixed 4/9 ML OH\*, 4/9 ML H<sub>2</sub>O\* and 1/9 ML O\*) and surface energies without ZPE correction. Gas phase H<sub>2</sub>O and H<sub>2</sub> as reference.

**Fig. S84** Configurations of 5OH\_3H<sub>2</sub>O\_1O (mixed 5/9 ML OH\*, 1/3 ML H<sub>2</sub>O\* and 1/9 ML O\*) and surface energies without ZPE correction. Gas phase H<sub>2</sub>O and H<sub>2</sub> as reference

**Fig. S85** Configurations of 3OH\_4H<sub>2</sub>O\_2O (mixed 1/3 ML OH\*, 4/9 ML H<sub>2</sub>O\* and 2/9 ML O\*) and surface energies without ZPE correction. Gas phase H<sub>2</sub>O and H<sub>2</sub> as reference

**Fig. S86** Configurations of 2OH\_4H<sub>2</sub>O\_3O (mixed 2/9 ML OH\*, 4/9 ML H<sub>2</sub>O\* and 1/3 ML O\*) and surface energies without ZPE correction. Gas phase H<sub>2</sub>O and H<sub>2</sub> as reference

**Fig. S87** Configurations of 3OH\_3H<sub>2</sub>O\_1O (mixed 1/3 ML OH\*, 4/9 ML H<sub>2</sub>O\* and 1/9 ML O\*) and surface energies without ZPE correction. Gas phase H<sub>2</sub>O and H<sub>2</sub> as reference

**Fig. S88** Configurations of 3OH\_4H<sub>2</sub>O\_1O (mixed 1/3 ML OH\*, 4/9 ML H<sub>2</sub>O\* and 1/9 ML O\*) and surface energies without ZPE correction. Gas phase H<sub>2</sub>O and H<sub>2</sub> as reference

**Fig. S89** Configurations of 4OH\_3H<sub>2</sub>O\_1O (mixed 4/9 ML OH\*, 1/3 ML H<sub>2</sub>O\* and 1/9 ML O\*) and surface energies without ZPE correction. Gas phase H<sub>2</sub>O and H<sub>2</sub> as reference

**Fig. S90** Configurations of 3OH\_3H<sub>2</sub>O\_2O (mixed 1/3 ML OH\*, 1/3 ML H<sub>2</sub>O\* and 2/9 ML O\*) and surface energies without ZPE correction. Gas phase H<sub>2</sub>O and H<sub>2</sub> as reference

**Fig. S91** Configurations of 3OH\_2H<sub>2</sub>O\_1O (mixed 1/3 ML OH\*, 2/9 ML H<sub>2</sub>O\* and 1/9 ML O\*) and surface energies without ZPE correction. Gas phase H<sub>2</sub>O and H<sub>2</sub> as reference

**Fig. S92** Configurations of 2OH\_3H<sub>2</sub>O\_1O (mixed 2/9 ML OH\*, 1/3 ML H<sub>2</sub>O\* and 1/9 ML O\*) and surface energies without ZPE correction. Gas phase H<sub>2</sub>O and H<sub>2</sub> as reference

**Fig. S93** Configurations of 3OH\_6H<sub>2</sub>O\_1H (mixed 1/3 ML OH\*, 2/3 ML H<sub>2</sub>O\* and 1/9 ML H\*) and surface energies without ZPE correction. Gas phase H<sub>2</sub>O and H<sub>2</sub> as reference

**Fig. S94** Configurations of 3OH\_6H<sub>2</sub>O\_2H (mixed 1/3 ML OH\*, 2/3 ML H<sub>2</sub>O\* and 2/9 ML H\*) and surface energies without ZPE correction. Gas phase H<sub>2</sub>O and H<sub>2</sub> as reference

**Fig. S95** Configurations of 3OH\_6H<sub>2</sub>O\_3H (mixed 1/3 ML OH\*, 2/3 ML H<sub>2</sub>O\* and 1/3 ML H\*) and surface energies without ZPE correction. Gas phase H<sub>2</sub>O and H<sub>2</sub> as reference

**Fig. S96** Configurations of 3OH\_6H<sub>2</sub>O\_4H (mixed 1/3 ML OH\*, 2/3 ML H<sub>2</sub>O\* and 4/9 ML H\*) and surface energies without ZPE correction. Gas phase H<sub>2</sub>O and H<sub>2</sub> as reference

**Fig. S97** Configurations of 3OH\_6H<sub>2</sub>O\_5H (mixed 1/3 ML OH\*, 2/3 ML H<sub>2</sub>O\* and 5/9 ML H\*) and surface energies without ZPE correction. Gas phase H<sub>2</sub>O and H<sub>2</sub> as reference

**Fig. S98** Configurations of 3OH\_6H<sub>2</sub>O\_6H (mixed 1/3 ML OH\*, 2/3 ML H<sub>2</sub>O\* and 2/3 ML H\*) and surface energies without ZPE correction. Gas phase H<sub>2</sub>O and H<sub>2</sub> as reference

**Fig. S99** Configurations of 3OH\_6H<sub>2</sub>O\_7H (mixed 1/3 ML OH\*, 2/3 ML H<sub>2</sub>O\* and 7/9 ML H\*) and surface energies without ZPE correction. Gas phase H<sub>2</sub>O and H<sub>2</sub> as reference

**Fig. S100** Configurations of 3OH\_6H<sub>2</sub>O\_8H (mixed 1/3 ML OH\*, 2/3 ML H<sub>2</sub>O\* and 8/9 ML H\*) and surface energies without ZPE correction. Gas phase H<sub>2</sub>O and H<sub>2</sub> as reference

**Fig. S101** Configurations of 3OH\_6H<sub>2</sub>O\_9H (mixed 1/3 ML OH\*, 2/3 ML H<sub>2</sub>O\* and 1 ML H\*) and surface energies without ZPE correction. Gas phase H<sub>2</sub>O and H<sub>2</sub> as reference

**Fig. S102** Configurations of 4OH\_5H<sub>2</sub>O\_1H (mixed 4/9 ML OH\*, 5/9 ML H<sub>2</sub>O\* and 1/9 ML H\*) and surface energies without ZPE correction. Gas phase H<sub>2</sub>O and H<sub>2</sub> as reference

**Fig. S103** Configurations of 4OH\_5H<sub>2</sub>O\_2H (mixed 4/9 ML OH\*, 5/9 ML H<sub>2</sub>O\* and 2/9 ML H\*) and surface energies without ZPE correction. Gas phase H<sub>2</sub>O and H<sub>2</sub> as reference

**Fig. S104** Configurations of 4OH\_5H<sub>2</sub>O\_3H (mixed 4/9 ML OH\*, 5/9 ML H<sub>2</sub>O\* and 1/3 ML H\*) and surface energies without ZPE correction. Gas phase H<sub>2</sub>O and H<sub>2</sub> as reference

**Fig. S105** Configurations of 4OH\_5H<sub>2</sub>O\_4H (mixed 4/9 ML OH\*, 5/9 ML H<sub>2</sub>O\* and 4/9 ML H\*) and surface energies without ZPE correction. Gas phase H<sub>2</sub>O and H<sub>2</sub> as reference

**Fig. S106** Configurations of 4OH\_5H<sub>2</sub>O\_5H (mixed 4/9 ML OH\*, 5/9 ML H<sub>2</sub>O\* and 5/9 ML H\*) and surface energies without ZPE correction. Gas phase H<sub>2</sub>O and H<sub>2</sub> as reference

**Fig. S107** Configurations of 5OH\_4H<sub>2</sub>O\_1H (mixed 5/9 ML OH\*, 4/9 ML H<sub>2</sub>O\* and 1/9 ML H\*) and surface energies without ZPE correction. Gas phase H<sub>2</sub>O and H<sub>2</sub> as reference

**Fig. S108** Configurations of 5OH\_4H<sub>2</sub>O\_2H (mixed 5/9 ML OH\*, 4/9 ML H<sub>2</sub>O\* and 2/9 ML H\*) and surface energies without ZPE correction. Gas phase H<sub>2</sub>O and H<sub>2</sub> as reference

**Fig. S109** Configurations of 5OH\_4H<sub>2</sub>O\_3H (mixed 5/9 ML OH\*, 4/9 ML H<sub>2</sub>O\* and 1/3 ML H\*) and surface energies without ZPE correction. Gas phase H<sub>2</sub>O and H<sub>2</sub> as reference

**Fig. S110** Configurations of 3OH\_3H<sub>2</sub>O\_1H (mixed 1/3 ML OH\*, 1/3 ML H<sub>2</sub>O\* and 1/9 ML H\*) and surface energies without ZPE correction. Gas phase H<sub>2</sub>O and H<sub>2</sub> as reference

**Fig. S111** Configurations of 3OH\_3H<sub>2</sub>O\_2H (mixed 1/3 ML OH\*, 1/3 ML H<sub>2</sub>O\* and 2/9 ML H\*) and surface energies without ZPE correction. Gas phase H<sub>2</sub>O and H<sub>2</sub> as reference

**Fig. S112** Configurations of 3OH\_3H<sub>2</sub>O\_3H (mixed 1/3 ML OH\*, 1/3 ML H<sub>2</sub>O\* and 1/3 ML H\*) and surface energies without ZPE correction. Gas phase H<sub>2</sub>O and H<sub>2</sub> as reference

**Fig. S113** Configurations of 2OH\_1H<sub>2</sub>O\_1H (mixed 2/9 ML OH\*, 1/9 ML H<sub>2</sub>O\* and 1/9 ML H\*) and surface energies without ZPE correction. Gas phase H<sub>2</sub>O and H<sub>2</sub> as reference

**Fig. S114** Configurations of 1OH\_2H<sub>2</sub>O\_1H (mixed 1/9 ML OH\*, 2/9 ML H<sub>2</sub>O\* and 1/9 ML H\*) and surface energies without ZPE correction. Gas phase H<sub>2</sub>O and H<sub>2</sub> as reference

**Fig. S115** Configurations of 1OH\_1H<sub>2</sub>O\_1H (mixed 1/9 ML OH\*, 1/9 ML H<sub>2</sub>O\* and 1/9 ML H\*) and surface energies without ZPE correction. Gas phase H<sub>2</sub>O and H<sub>2</sub> as reference

**Fig. S116** Surface phase structures of fcc MoC (001) surface under H<sub>2</sub>O/H<sub>2</sub> environment at 473.15 K (only molecular H<sub>2</sub>O adsorption structures were considered).

**Fig. S117** Surface phase structures of fcc MoC (001) surface under H<sub>2</sub>O/H<sub>2</sub> environment at 473.15 K (only surface OH\* structures were considered).

**Fig. S118** Surface phase structures of fcc MoC (001) surface under H<sub>2</sub>O/H<sub>2</sub> environment at 473.15 K (only surface O\* structures were considered).

**Fig. S119** Surface phase structures of fcc MoC (001) surface under H<sub>2</sub>O/H<sub>2</sub> environment at 473.15 K (only surface H\* structures were considered).

**Fig. S120** Surface phase structures of fcc MoC (001) surface under H<sub>2</sub>O/H<sub>2</sub> environment at 473.15 K (only surface H<sub>2</sub>\* structures were considered). (a) showed that the adsorption of H<sub>2</sub> was thermodynamically unstable at the specified conditions; (b) showed that the surface energies for adsorption of H<sub>2</sub> on fcc MoC (001) surface were always higher than that of bare surface (referenced as 0).

**Fig. S121** Surface phase structures of fcc MoC (001) surface under H<sub>2</sub>O/H<sub>2</sub> environment at 473.15 K (only pure surface H<sub>2</sub>O\* and pure surface OH\* structures were considered without considering their mixtures).

**Fig. S122** Surface phase structures of fcc MoC (001) surface under H<sub>2</sub>O/H<sub>2</sub> environment at 473.15 K (only pure surface H<sub>2</sub>O\*, pure surface OH\* and pure surface O\* structures were considered without considering their mixtures).

**Fig. S123** Surface phase structures of fcc MoC (001) surface under H<sub>2</sub>O/H<sub>2</sub> environment at 473.15 K (only pure surface H<sub>2</sub>O\*, pure surface OH\*, pure surface O\*, pure surface H\* and pure surface H<sub>2</sub>\* structures were considered without considering their mixtures).

**Fig. S124** Surface phase structures of fcc MoC (001) surface under H<sub>2</sub>O/H<sub>2</sub> environment at 473.15 K (only pure surface H<sub>2</sub>O\*, pure surface OH\*, pure surface O\*, pure surface H\*, pure surface H<sub>2</sub>\* and the mixtures of H<sub>2</sub>O\*/OH\* structures were considered).

**Fig. S125** Surface phase structures of fcc MoC (001) surface under H<sub>2</sub>O/H<sub>2</sub> environment at 473.15 K (only pure surface H<sub>2</sub>O\*, pure surface OH\*, pure surface O\*, pure surface H\*, pure surface H<sub>2</sub>\*, the mixtures of H<sub>2</sub>O\*/OH\*, H<sub>2</sub>O\*/OH\*/O\*, H<sub>2</sub>O\*/OH\*/H\* structures were considered).

**Fig. S126** The potential energy profiles for the transformation of top site O\* to a bridge site O\* on stable surface phases.

**Fig. S127** The potential energy profiles for the H<sub>2</sub>O dissociation to generate surface OH\* (a) and OH\* direct deprotonation to generate O\* (b) on 3OH\_3H<sub>2</sub>O\_1O surface structure.

**Fig. S128** The potential energy profiles for the H<sub>2</sub>O dissociation to generate surface OH\* (a) and OH\* direct deprotonation to generate O\* (b) on 4OH\_4H<sub>2</sub>O\_1O surface structure.

**Fig. S129** The potential energy profiles for the H<sub>2</sub>O dissociation to generate surface OH\* (a) and OH\* direct deprotonation to generate O\* (b) on 3OH\_4H<sub>2</sub>O\_2O surface structure.

**Fig. S130** The potential energy profiles for the H<sub>2</sub>O dissociation to generate surface OH\* (a) and OH\* direct deprotonation to generate O\* (b) on 3OH\_3H<sub>2</sub>O surface structure.

**Fig. S131** The potential energy profiles for the H<sub>2</sub>O dissociation to generate surface OH\* (a) and OH\* direct deprotonation to generate O\* (b) on 4OH\_5H<sub>2</sub>O surface structure.

**Fig. S132** The potential energy profiles for the H<sub>2</sub>O dissociation to generate surface OH\* (a) and OH\* direct deprotonation to generate O\* (b) on 3OH\_6H<sub>2</sub>O surface structure.

**Fig. S133** The potential energy profiles for the H<sub>2</sub> dissociation to generate surface H\* on 3OH\_3H<sub>2</sub>O\_1O surface structure.

**Fig. S134** The potential energy profiles for the H<sub>2</sub> dissociation to generate surface H\* on 3OH\_3H<sub>2</sub>O surface structure.

**Table S1** Energetic aspects of surface H<sub>2</sub>O\* dissociation with n adsorbing H<sub>2</sub>O\* (n = 1-9),  $\Delta E_{TS,ZPE}^\ddagger$  and  $\Delta E_{TS}^\ddagger$  were energy barriers of H<sub>2</sub>O\* dissociation with or without ZPE correction, respectively;  $\Delta E_{r,ZPE}$  and  $\Delta E_r$  were reaction energies of H<sub>2</sub>O\* dissociation with or without ZPE correction, respectively;  $\sigma_{TS}^\ddagger$  were imaginary frequencies of transition states for H<sub>2</sub>O\* dissociation;  $d_{O\dots H}^\ddagger$  and  $d_{C\dots H}^\ddagger$  were the lengths of breaking O-H bond of H<sub>2</sub>O\* and lengths of forming C-H bond of C site in the transition state, respectively. Energies were in eV with H<sub>2</sub>O\* adsorption states as reference, distances were in Å and frequencies were in cm<sup>-1</sup>

**Table S2** Energetic aspects of surface H<sub>2</sub>O\* dissociation with n adsorbing OH\* (n = 1-8),  $\Delta E_{TS,ZPE}^\ddagger$  and  $\Delta E_{TS}^\ddagger$  were energy barriers of H<sub>2</sub>O\* dissociation with or without ZPE correction, respectively;  $\Delta E_{r,ZPE}$  and  $\Delta E_r$  were reaction energies of H<sub>2</sub>O\* dissociation with or without ZPE correction, respectively;  $\sigma_{TS}^\ddagger$  were imaginary frequencies of transition states for H<sub>2</sub>O\* dissociation;  $d_{O\dots H}^\ddagger$  and  $d_{C\dots H}^\ddagger$  were the lengths of breaking O-H bond of H<sub>2</sub>O\* and lengths of forming C-H bond of C site in the transition state, respectively. Energies were in eV with H<sub>2</sub>O\* adsorption states as reference, distances were in Å and frequencies were in cm<sup>-1</sup>

**Table S3** Reaction rate constants k (s<sup>-1</sup>) of elementary reactions at different surface coverage at 473.15 K; the reaction pathway with lowest energy barrier at each coverage was selected. (In order to cancel the error with low frequency mode in calculating the vibrational partition functions, frequencies below 200 cm<sup>-1</sup> were shifted to 200 cm<sup>-1</sup>)



### S-1. Detailed description on the elementary reaction rate constant calculation

The reaction rate constant  $k$  of each elementary step in surface reactions is calculated as below:

$$k = \frac{k_B T}{h} \frac{q_{TS,vib}}{q_{IS,vib}} e^{-\frac{E_a}{k_B T}}$$

Where  $k_B$  is Boltzmann constant,  $T$  denotes the reaction temperature,  $h$  is the Planck constant,  $E_a$  stands for the zero-point energy corrected energy barrier for elementary reaction derived from DFT calculations,  $q_{TS,vib}$  and  $q_{IS,vib}$  are the vibrational partition functions for the transition states and the initial states, respectively.  $q_{vib}$  is calculated as below:

$$q_{vib} = \prod_i \frac{1}{1 - e^{-\frac{h\nu_i}{k_B T}}}$$

where  $\nu_i$  is the vibrational frequency of each vibrational mode of the surface adsorbing species derived from DFT harmonic frequency calculations. In order to cancel the error with low frequency mode, frequencies below  $50 \text{ cm}^{-1}$  were shifted to  $50 \text{ cm}^{-1}$ .

### S-2. Detailed description on the *ab initio* thermodynamic method

The stability of different surface configurations with  $i$  adsorbing species at temperature  $T$  and pressure  $p$  can be expressed as below:

$$\gamma_{T,p} = G_{T,p}^{slab,adsorbates} - G_{T,p}^{slab} - \sum_i (n^i * \mu_{T,p}^i) \quad (a)$$

where  $G_{T,p}^{slab,adsorbates}$  is the Gibbs free energy of the catalyst model with adsorbates,  $G_{T,p}^{slab}$  is Gibbs free energy of the clean catalyst model and  $\mu_{T,p}^i$  is the chemical potential of isolated species  $i$ . A more negative  $\gamma_{T,p}$  denotes a more stable surface structure. For the condensed phases, the variation of vibrational energy and entropy contributions to the Gibbs free energy usually cancel to a large extent in the subtraction term  $G_{T,p}^{slab,adsorbates} - G_{T,p}^{slab}$ . With considering only the thermal correction to the adsorbates, the term  $G_{T,p}^{slab,adsorbates} - G_{T,p}^{slab}$  can be replaced by  $E_{0K,ZPE}^{slab,adsorbates} + \Delta G_T^{adsorbates} - E_{0K}^{slab}$ , where the  $E_{0K,ZPE}^{slab,adsorbates}$  and  $E_{0K}^{slab}$  are the total energies of catalyst model with adsorbates and clean catalyst model, respectively;  $\Delta G_T^{adsorbates}$  is the thermal correction to the adsorbates which is calculated according to the following equation as implemented in VASPKIT software (V. Wang and N. Xu, VASPKIT: A pre- and post-processing program for the VASP code, <http://vaspkit.sourceforge.net>):

$$\Delta G_T^{adsorbates} = -RT \ln(q_{vib}^{ads}), \quad q_{vib}^{ads} = \prod_{j=1}^{nmv} \frac{1}{1 - \exp(-h\nu_j/k_B T)}$$

is the vibrational partition functions for adsorbates,  $\nu_j$  is the normal mode vibration ( $nmv$ ) frequency of adsorbates,  $h$  is Plank constant and  $k_B$  is Boltzmann constant. Thus equation (a) can be simplified as below:

$$\gamma_{T,p} = E_{0K,ZPE}^{slab,adsorbates} + \Delta G_T^{adsorbates} - E_{0K}^{slab} - \sum_i (n^i * \mu_{T,p}^i) \quad (b)$$

For gas phase (assuming ideal gas), the chemical potential of species  $i$  depending on temperature and pressure can be expressed below:

$$\mu_{T,p}^i = E_{0K,ZPE}^i + \mu_{T,p^0}^i + RT \ln\left(\frac{p^i}{p^0}\right) \quad (c)$$

where  $E_{0K,ZPE}^i$  is the total energy of isolated species  $i$  with ZPE correction obtained from DFT calculation,  $\mu_{T,p^0}^i$  is the energy difference between the chemical potential (temperature  $T$  and pressure 1 atm) and total energy at 0K for species  $i$ ,  $p^i$  is the partial pressure of species  $i$ ,  $p^0$  is the standard atmospheric pressure,  $\mu_{T,p^0}^i$  values are taken from the JANAF thermochemical tables (<https://janaf.nist.gov/>).

For liquid phase, the chemical potential of species  $i$  depending on temperature and pressure can be expressed below:

$$\mu_{T,p}^i = E_{0K,ZPE}^i + \mu_{T,p^0}^i + RT \ln \left( \frac{p_{saturation}^i}{p^0} \right) + V_i (p^i - p_{saturation}^i) \quad (d)$$

where  $p_{saturation}^i$  is the saturated vapor pressure of species  $i$  at temperature  $T$ ,  $V_i$  is the unit volume of liquid phase  $i$  at temperature  $T$ .

Combining equation (b) and (c), the following expression can be obtained:

$$\gamma_{T,p} = E_{0K,ZPE}^{slab,adsorbates} + \Delta G_T^{adsorbates} - E_{0K}^{slab} - \sum_i (n^i * E_{0K,ZPE}^i) - \sum_i (n^i * \mu_{T,p^0}^i) - RT \sum_i (n^i * \ln \left( \frac{p^i}{p^0} \right)) \quad (e)$$

where the surface stability with  $i$  number gas phase species can be evaluated.

Combining equation (b) and (d), the following expression can be obtained:

$$\begin{aligned} \gamma_{T,p} = & E_{0K,ZPE}^{slab,adsorbates} + \Delta G_T^{adsorbates} - E_{0K}^{slab} - \sum_{i+j} (n^{i+j} * E_{0K,ZPE}^{i+j}) - \sum_{i+j} (n^{i+j} * \mu_{T,p^0}^{i+j}) - \\ & RT \sum_i (n^i * \ln \left( \frac{p^i}{p^0} \right)) - RT \sum_j (n^j * \ln \left( \frac{p_{saturation}^j}{p^0} \right)) - \sum_j (n^j * V^j * (p^j - p_{saturation}^j)) \end{aligned} \quad (f)$$

where the surface stability with  $i$  number gas phase species and  $j$  number liquid phase species can be evaluated.

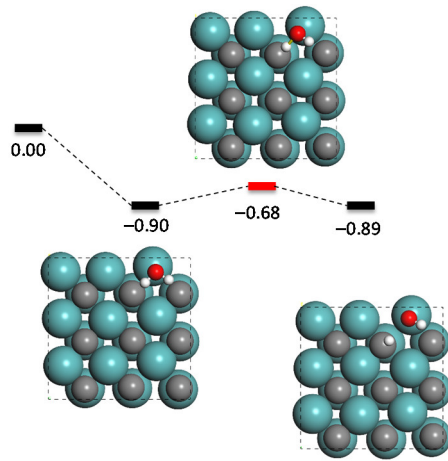

(1)

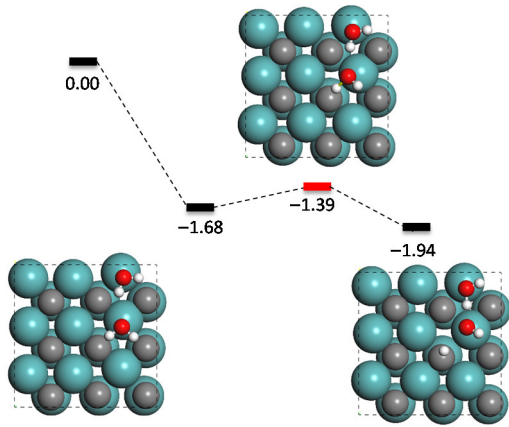

(2-a)

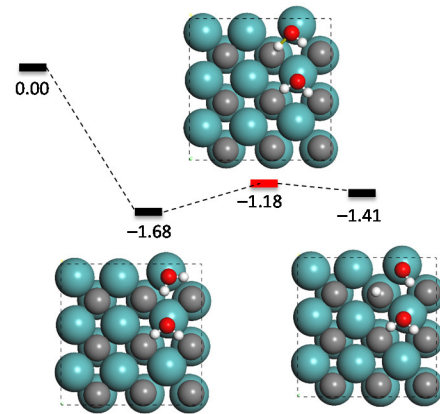

(2-b)

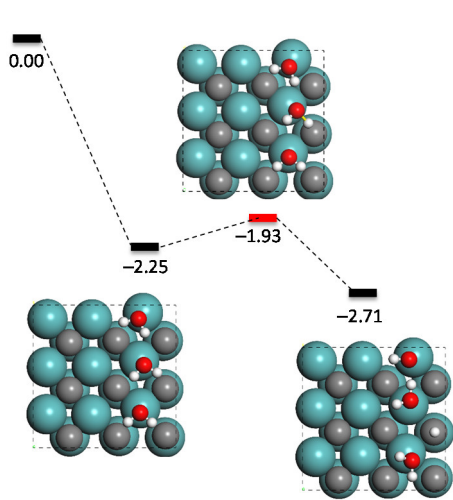

(3-a)

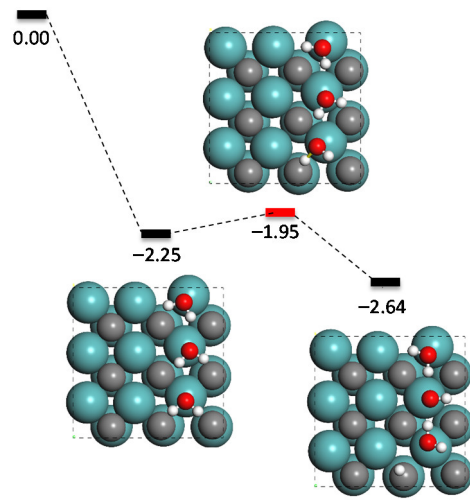

(3-b)

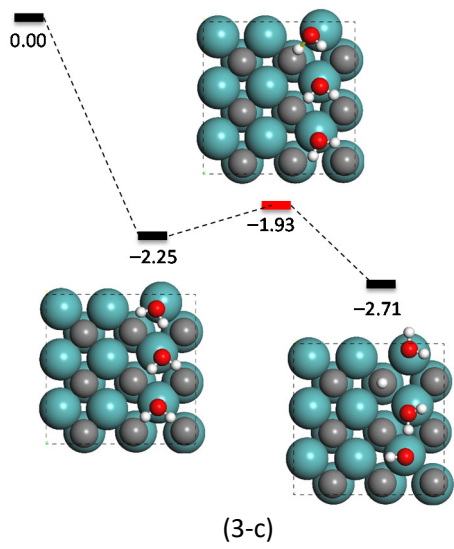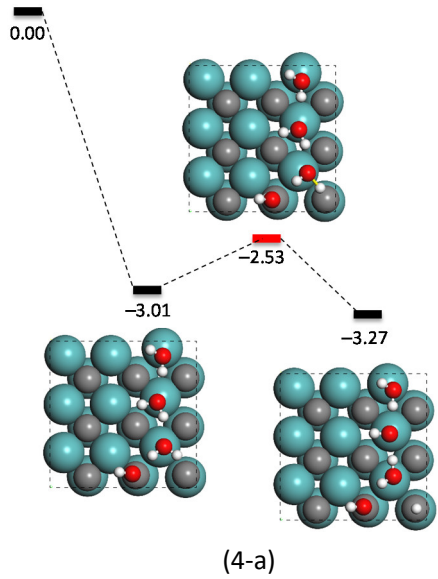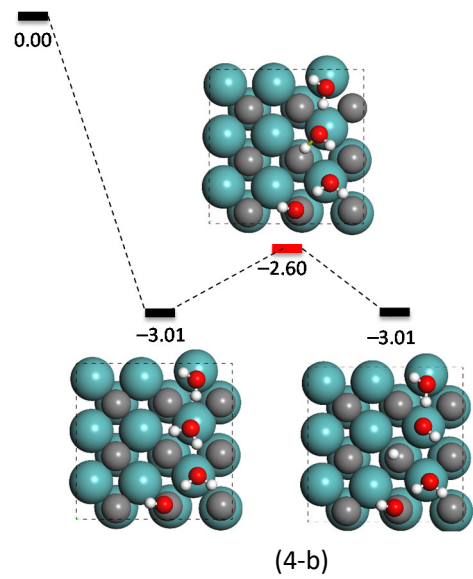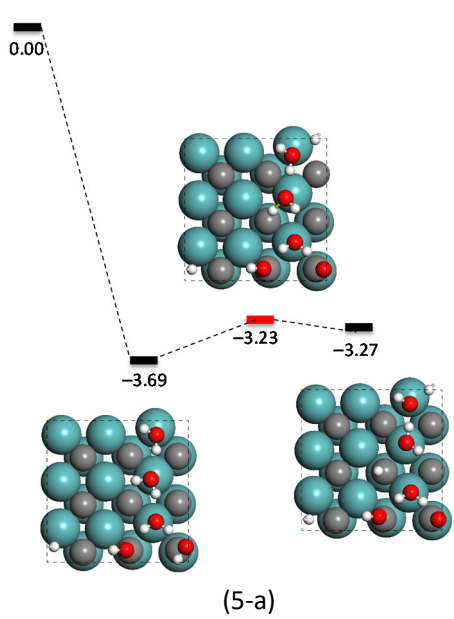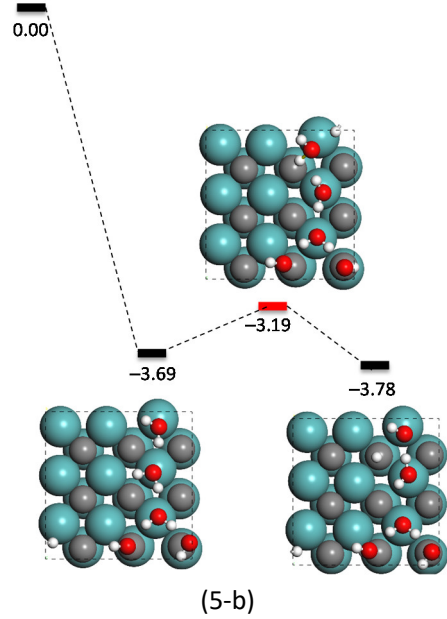

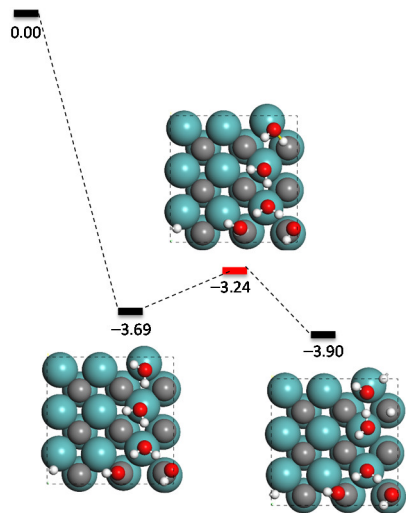

(5-c)

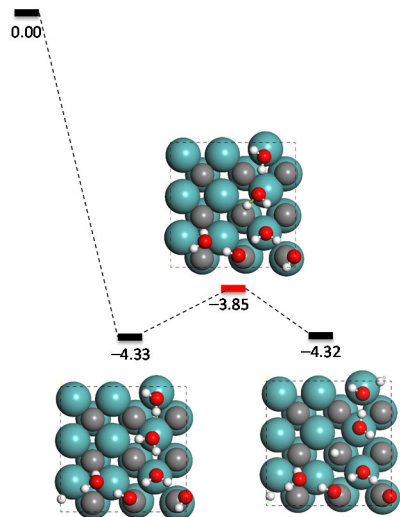

(6-a)

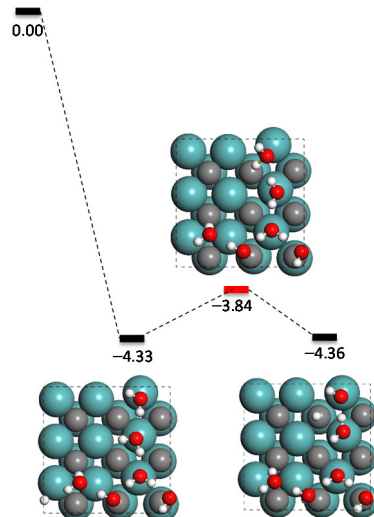

(6-b)

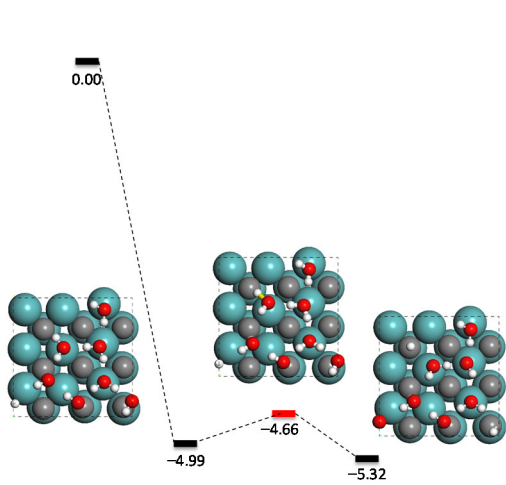

(7-a)

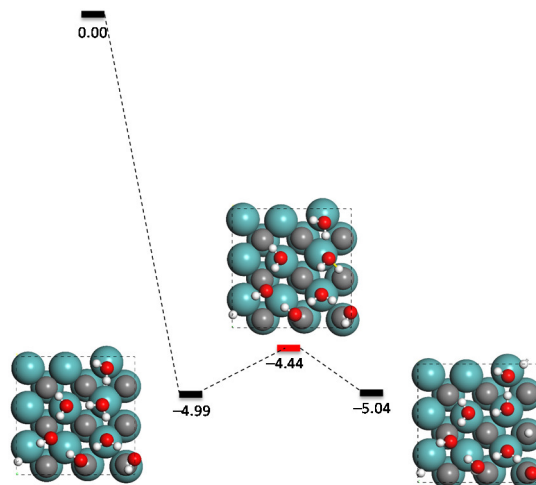

(7-b)

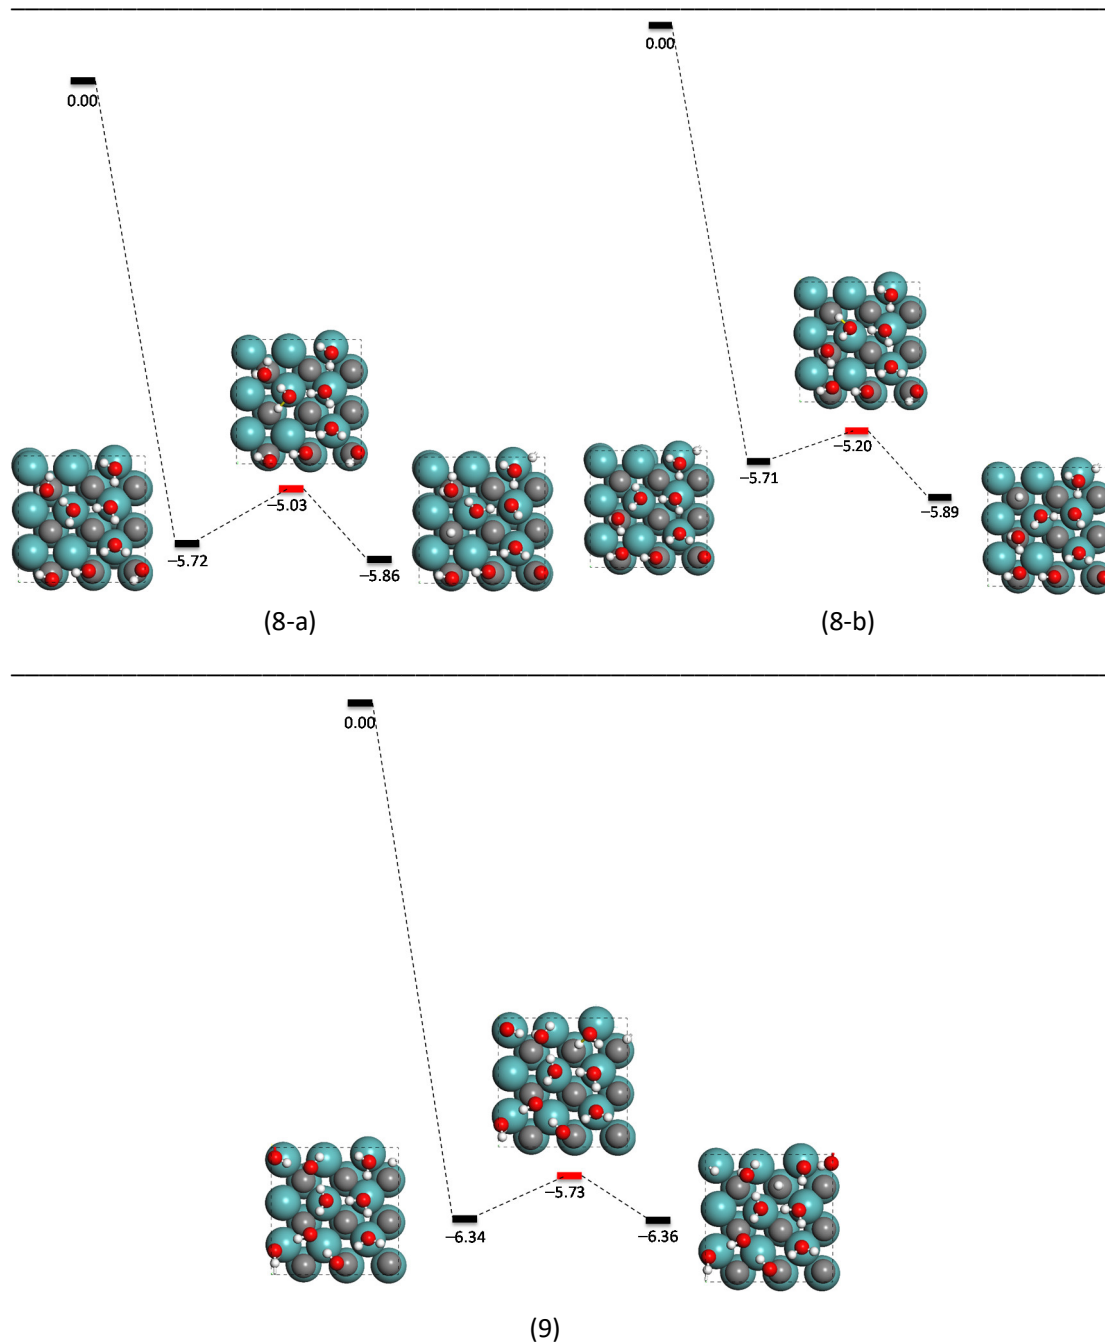

**Fig. S1** The potential energy profiles with ZPE correction for  $\text{H}_2\text{O}^*$  dissociation at different  $\text{H}_2\text{O}^*$  coverage (For each  $\text{H}_2\text{O}^*$  coverage, more than one site for  $\text{H}_2\text{O}$  dissociation may be considered, energies in eV with gas phase  $\text{H}_2\text{O}$  and  $\text{H}_2$  as reference)

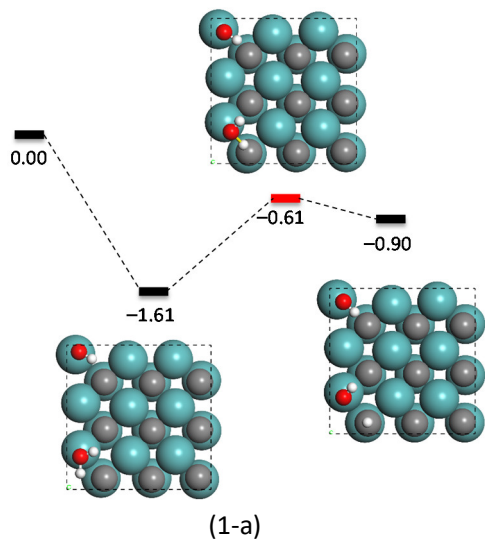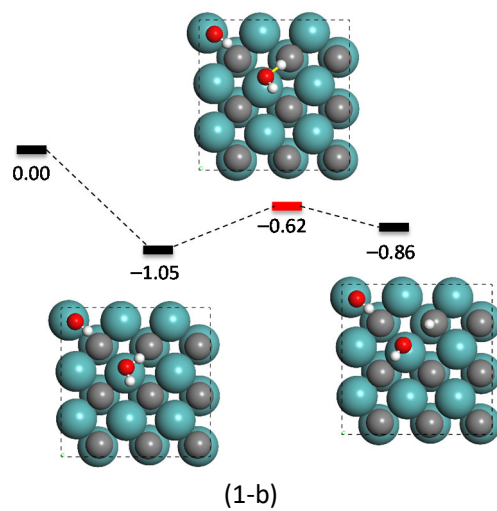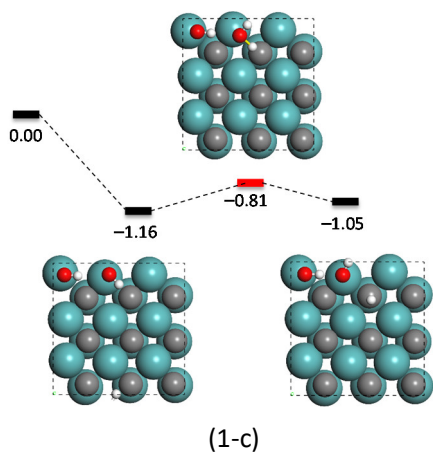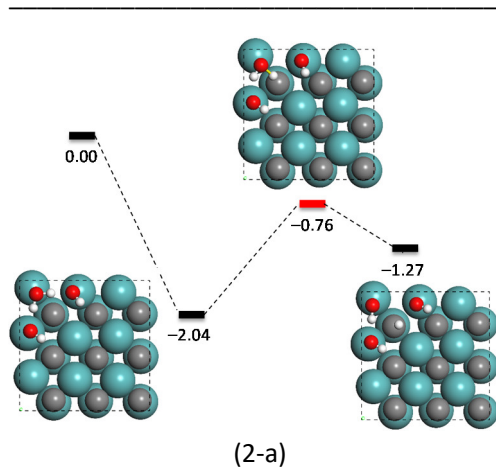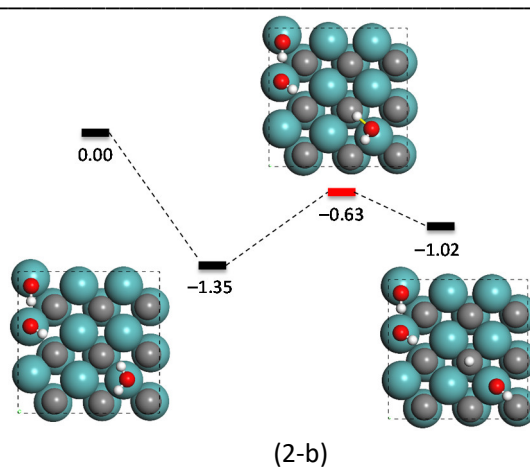

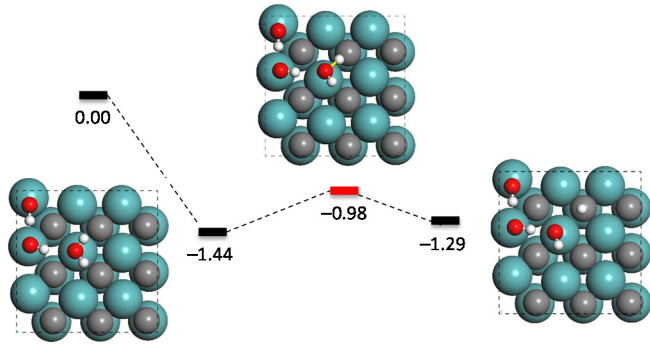

(2-c)

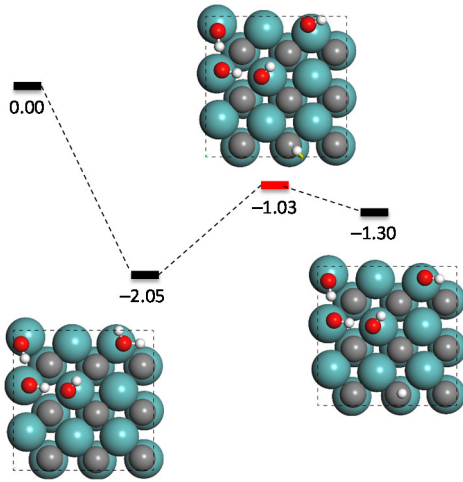

(3-a)

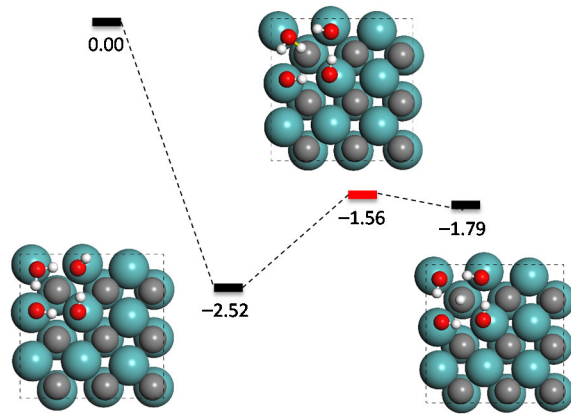

(3-b)

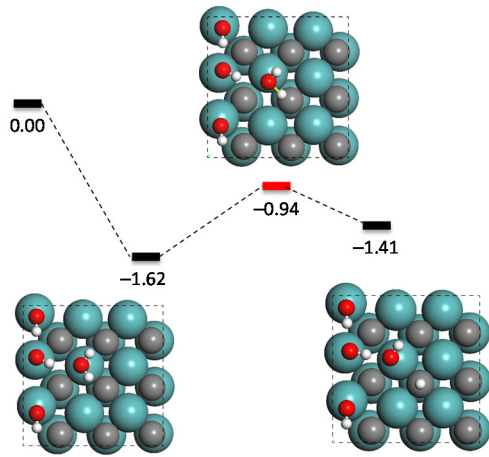

(3-c)



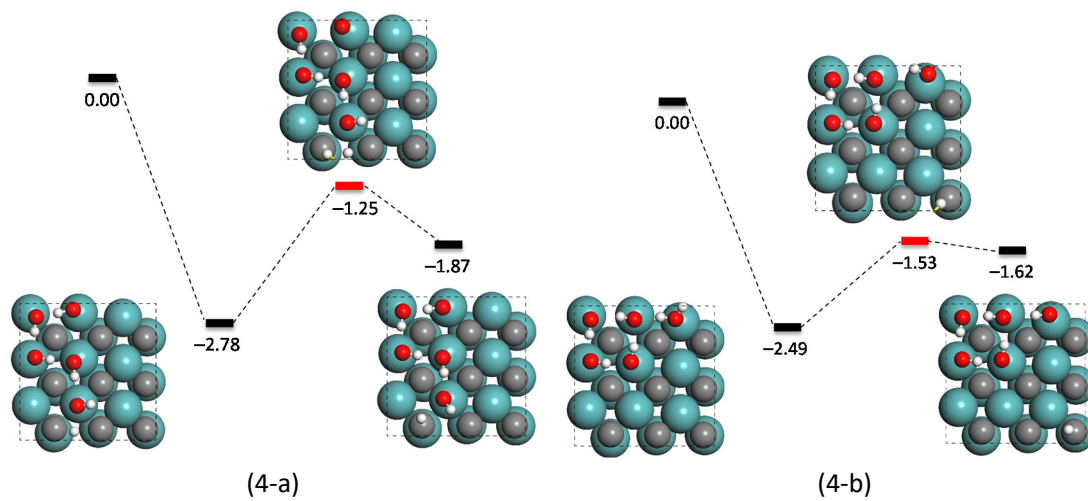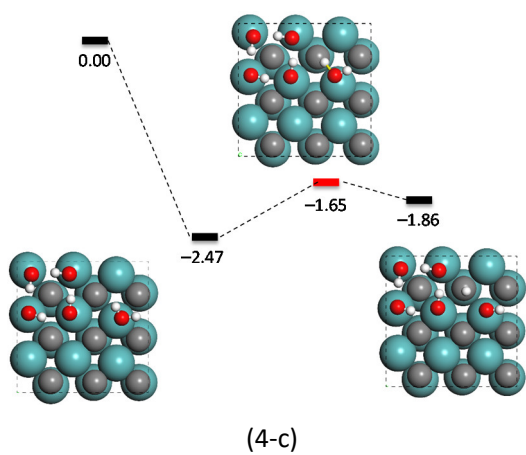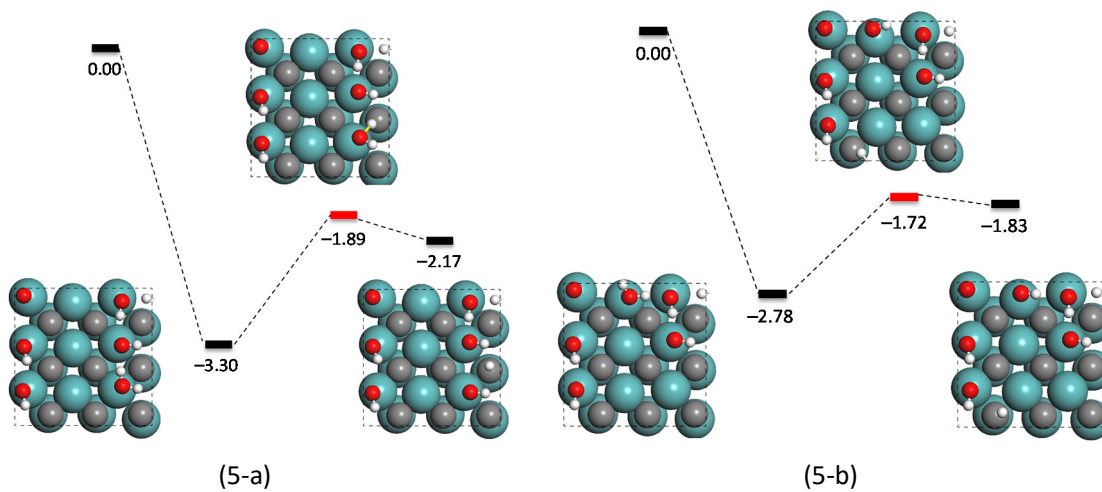

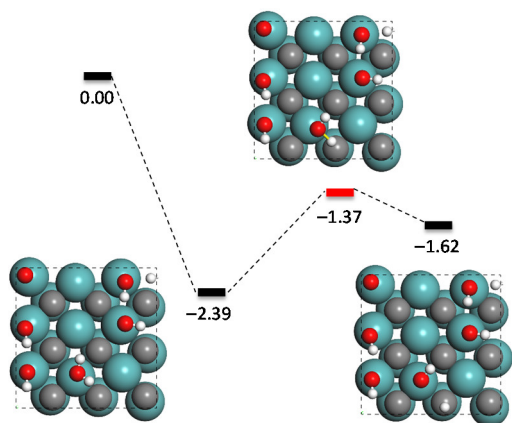

(5-c)

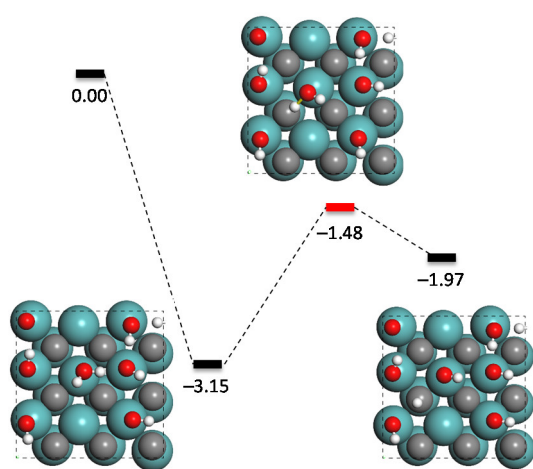

(6-a)

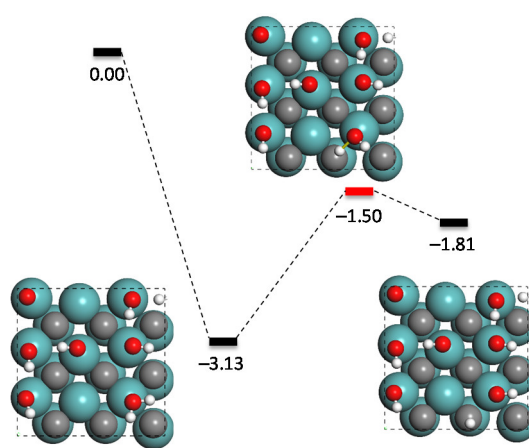

(6-b)

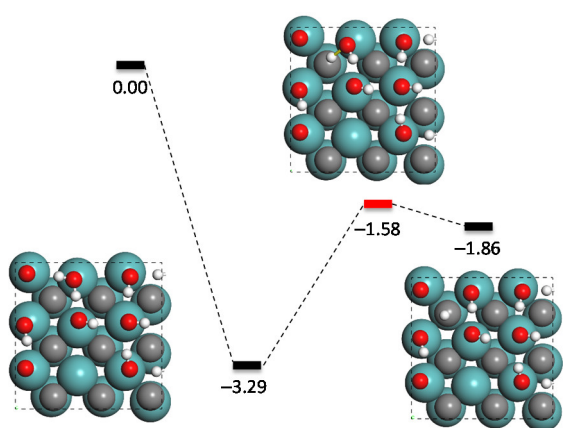

(7)

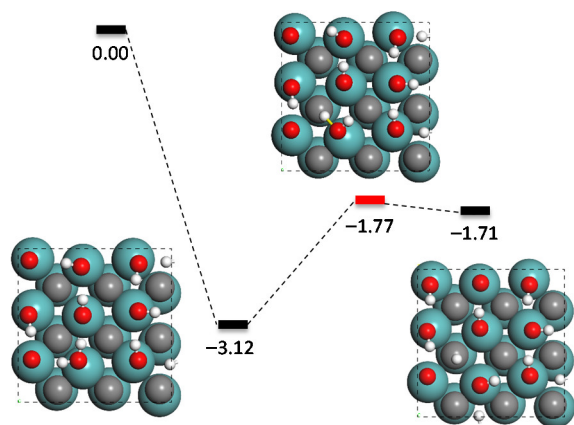

(8)

**Fig. S2** The potential energy profiles with ZPE correction for  $\text{H}_2\text{O}^*$  dissociation at different  $\text{OH}^*$  coverage (For each  $\text{OH}^*$  coverage, more than one site for  $\text{H}_2\text{O}$  dissociation may be considered, energies in eV with gas phase  $\text{H}_2\text{O}$  and  $\text{H}_2$  as reference)

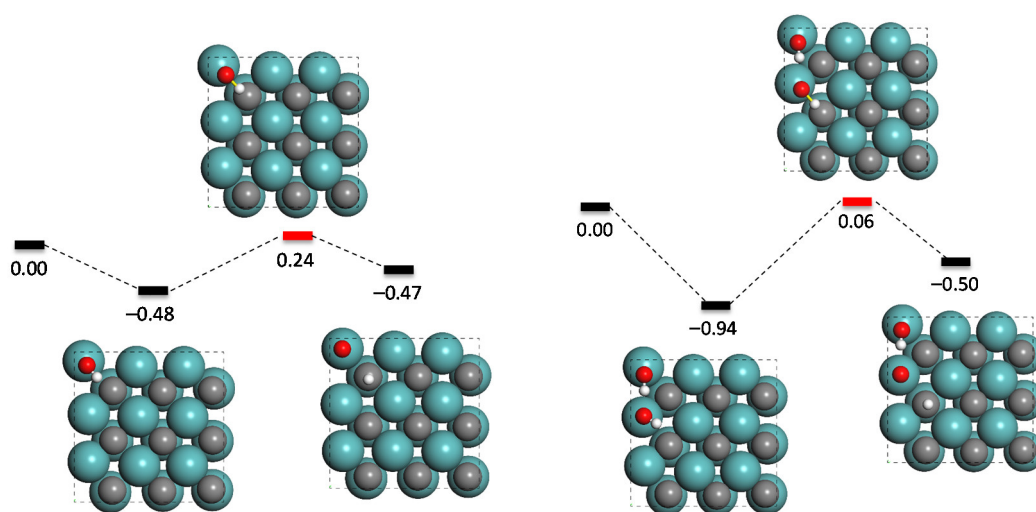

(1)

(2)

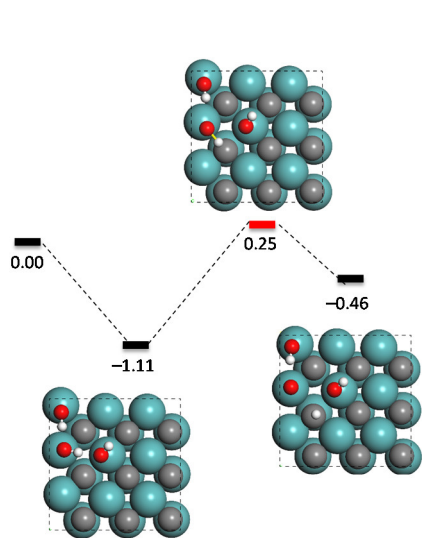

(3)

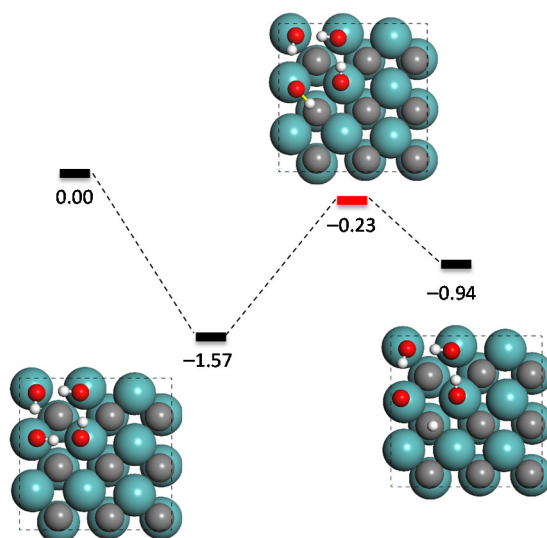

(4)

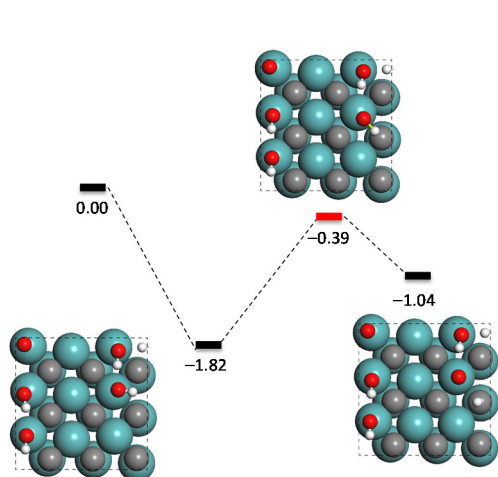

(5)

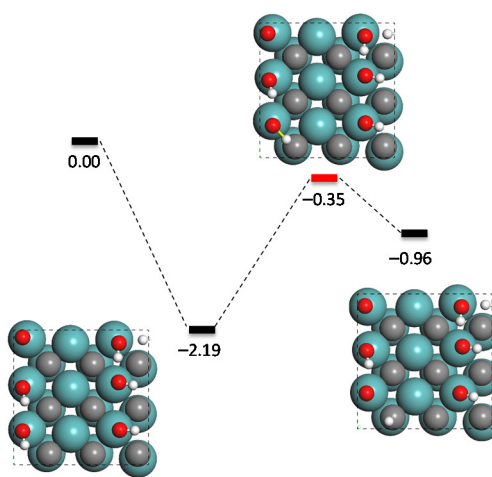

(6)

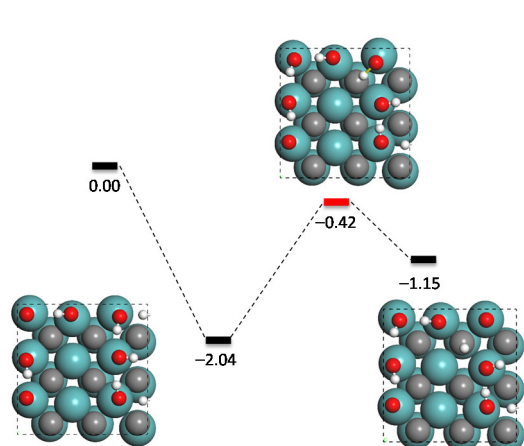

(7)

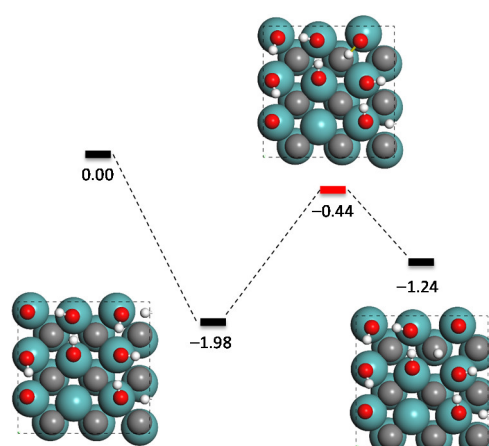

(8)

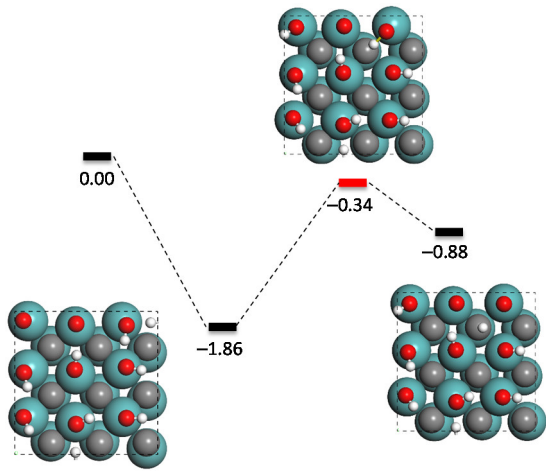

(9)

**Fig. S3** The potential energy profiles with ZPE correction for direct deprotonation of single OH\* at different OH\* coverage (Energies in eV with gas phase H<sub>2</sub>O and H<sub>2</sub> as reference)

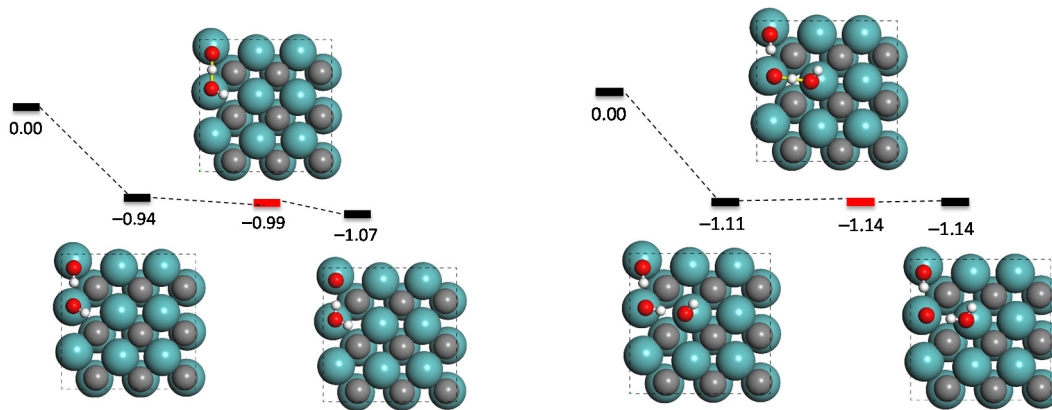

(1)

(2)

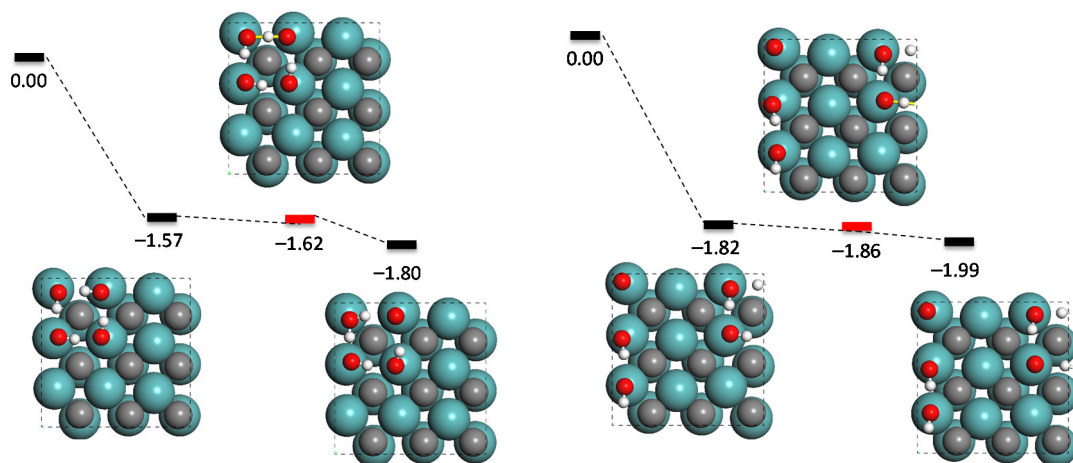

(3)

(4)

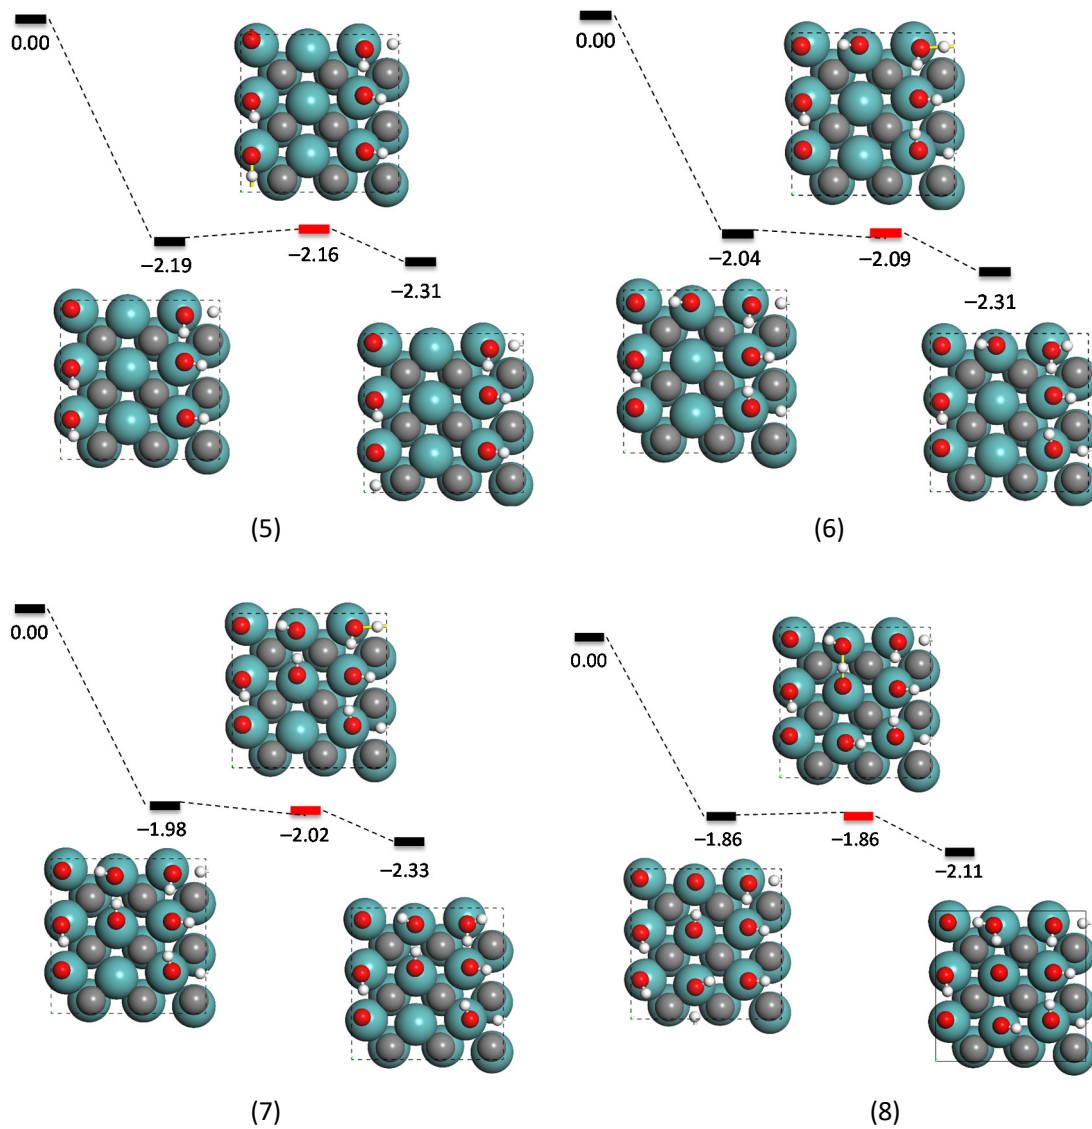

**Fig. S4** The potential energy profiles with ZPE correction for hydroxyls condensation at different OH\* coverage (Energies in eV with gas phase H<sub>2</sub>O and H<sub>2</sub> as reference)

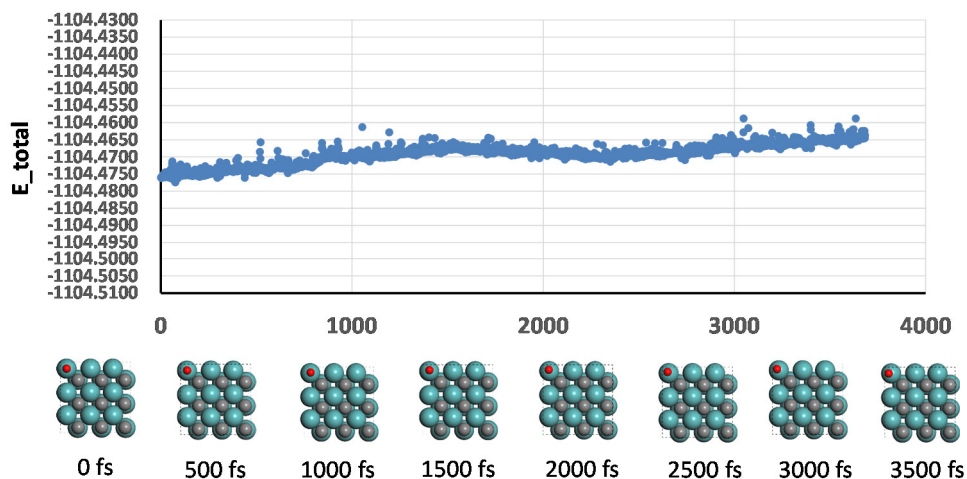

**Fig. S5** Structure evolution of surface O\* at 1/9 ML coverage with time scale of 1-3700 femtoseconds at temperature of 473.15K. A canonical ensemble with Nosé-Hoover thermostats was employed in the *ab initio* molecular dynamics (AIMD), and the time step was set to 1 fs.

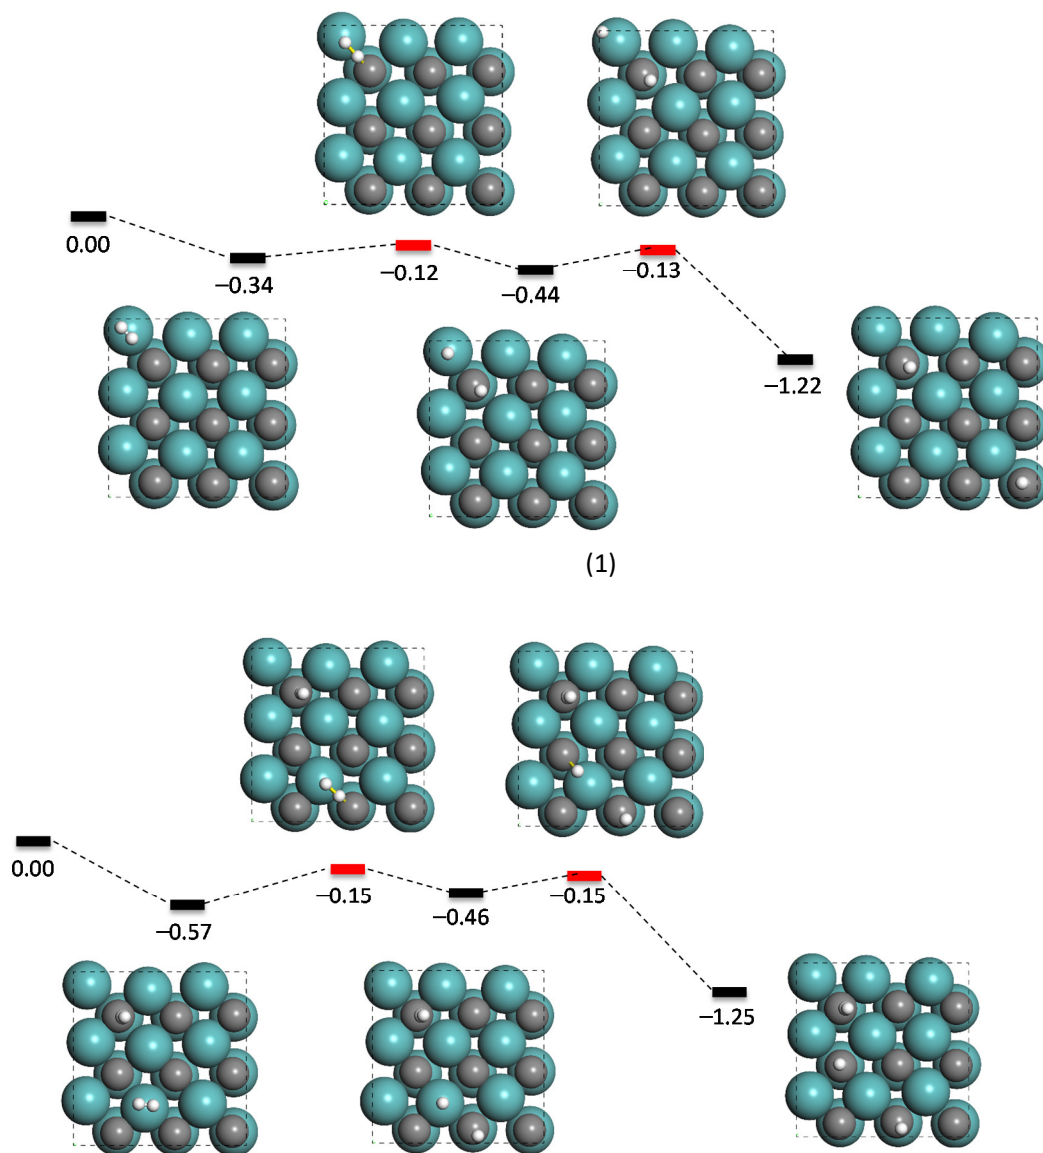

(2)

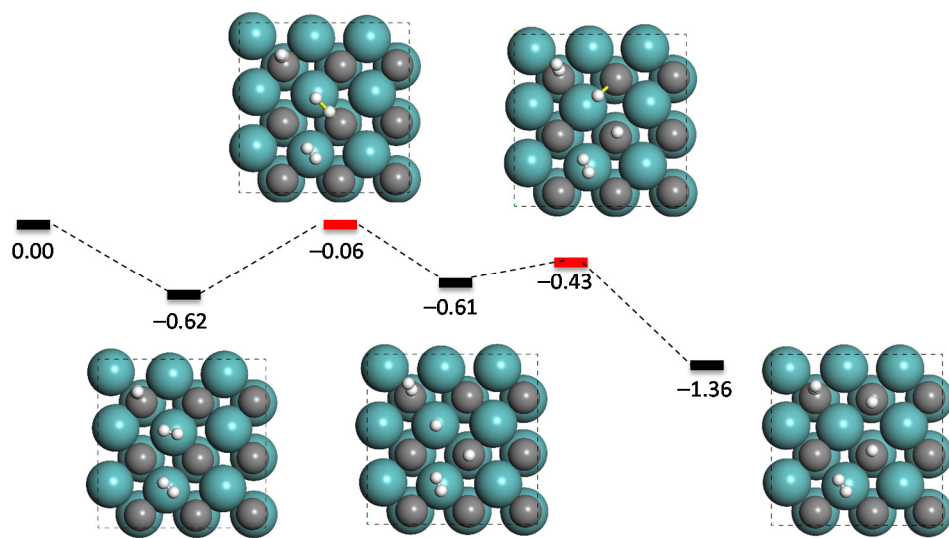

(3)

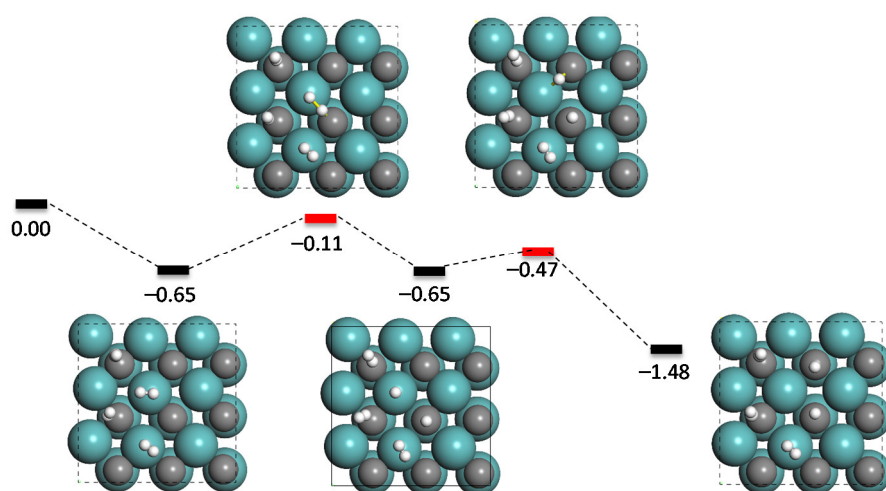

(4)

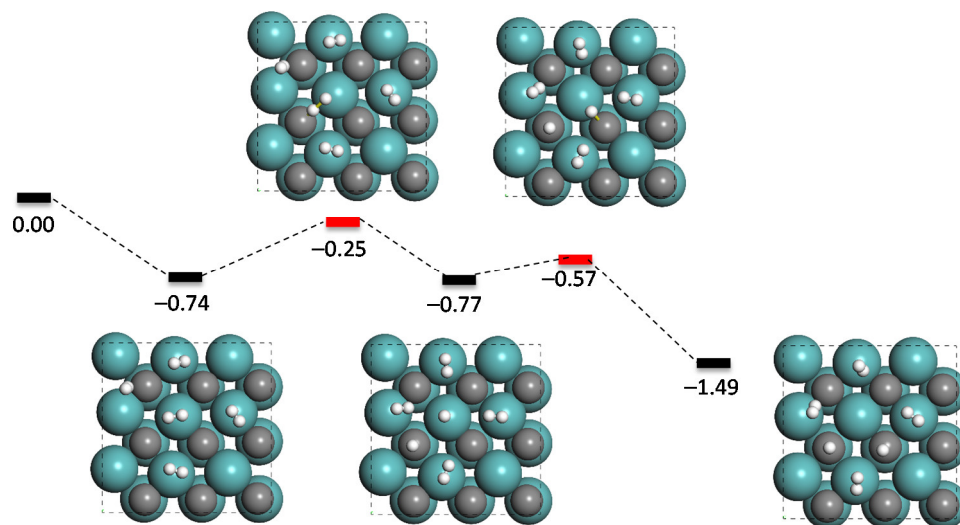

(5)



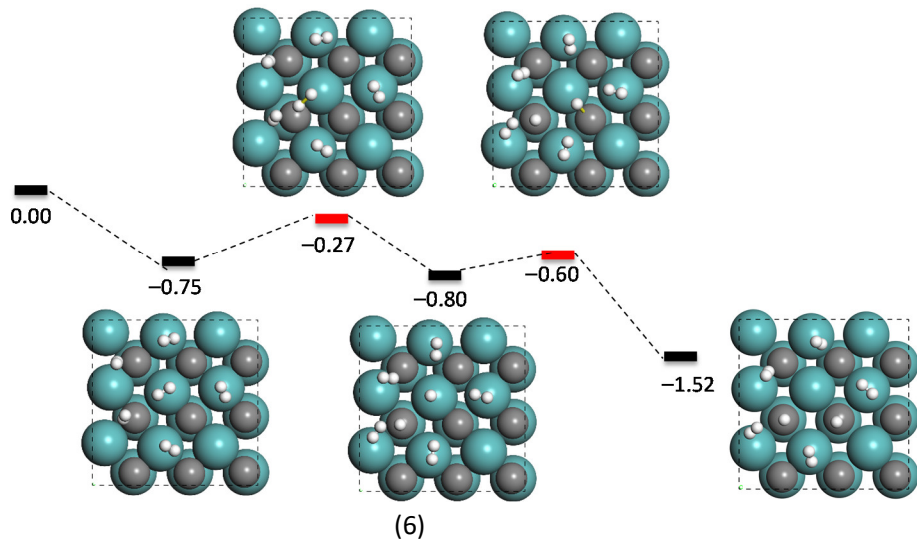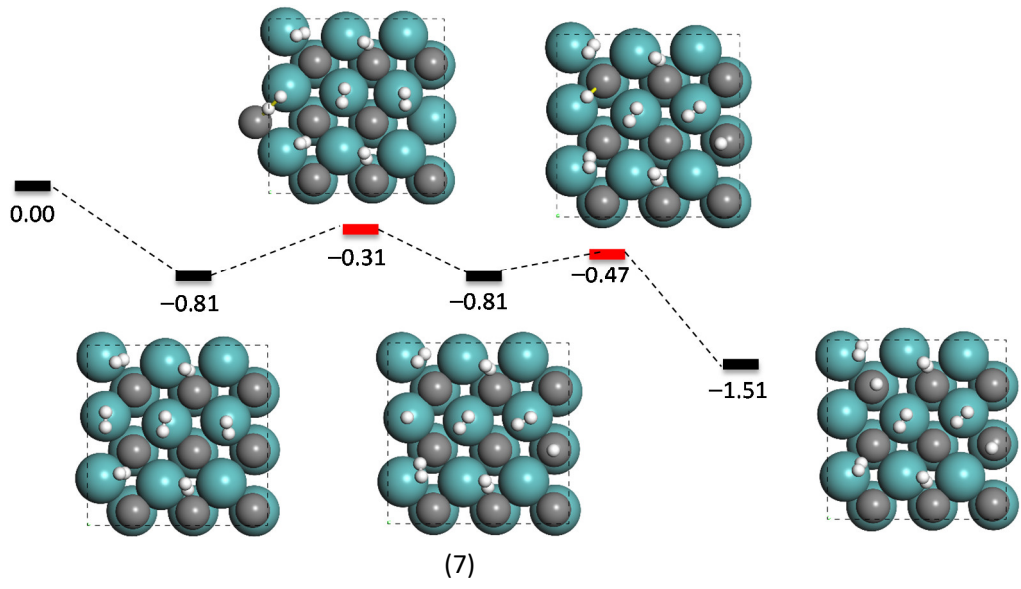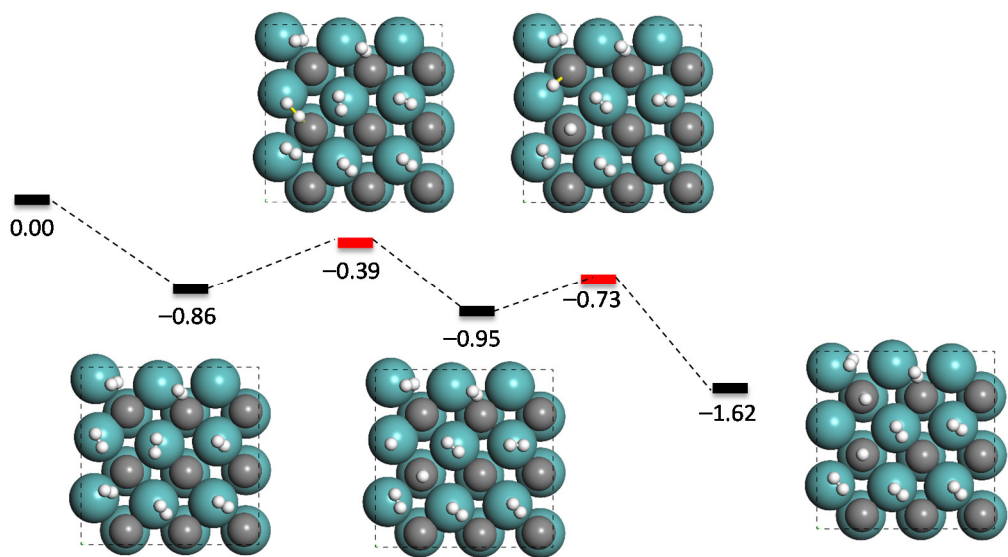

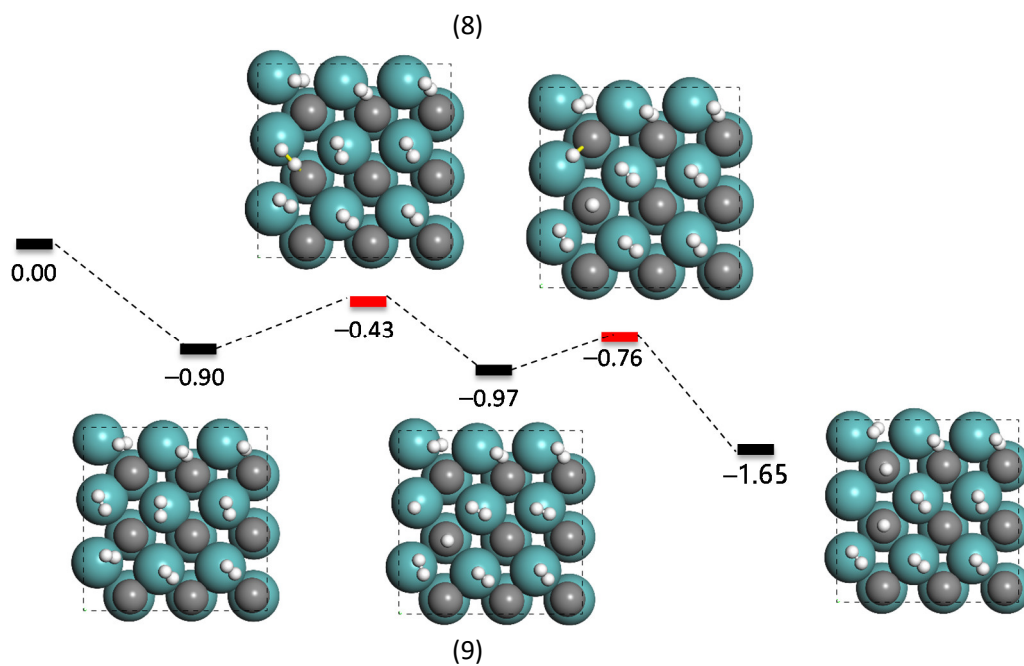

**Fig. S6** The potential energy profiles with ZPE correction for H-H bond breaking and H transfer at different  $\text{H}_2^*$  coverage. Energies in eV with gas phase  $\text{H}_2\text{O}$  and  $\text{H}_2$  as reference.

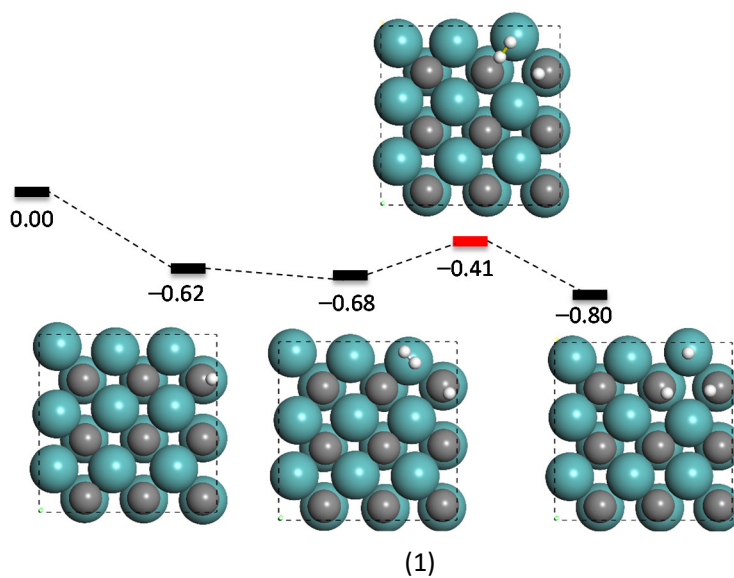

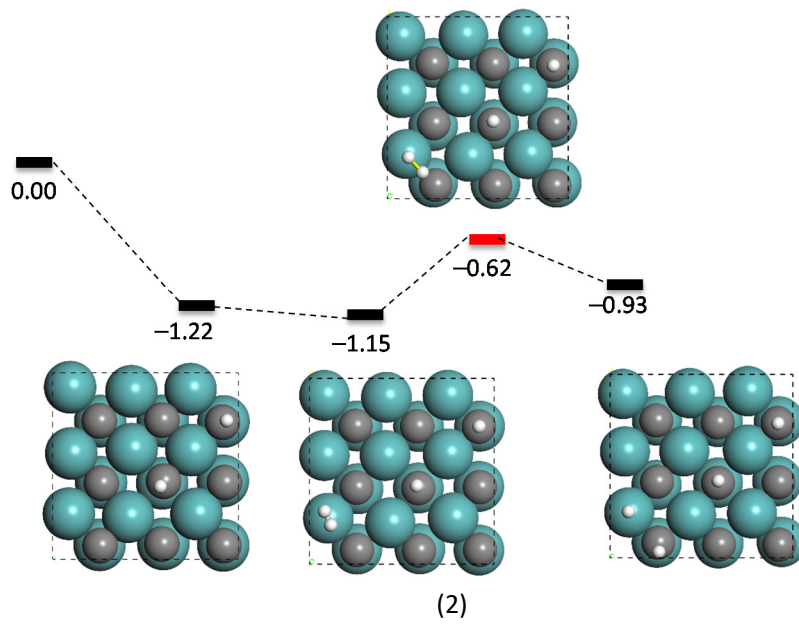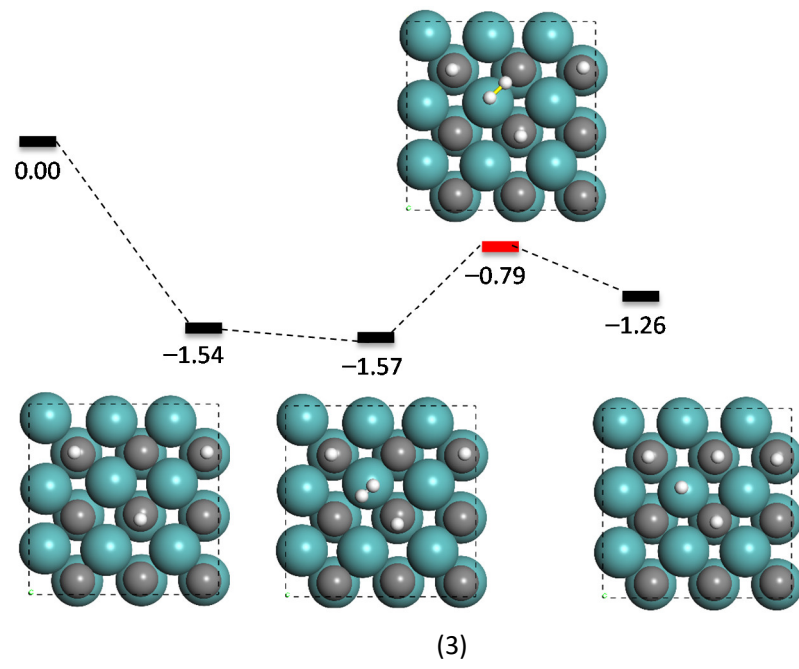

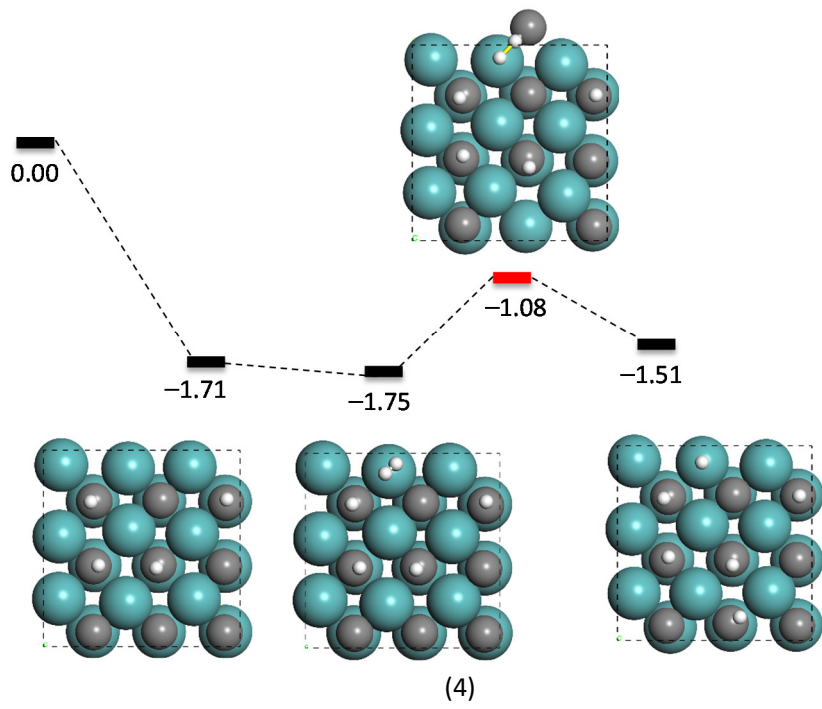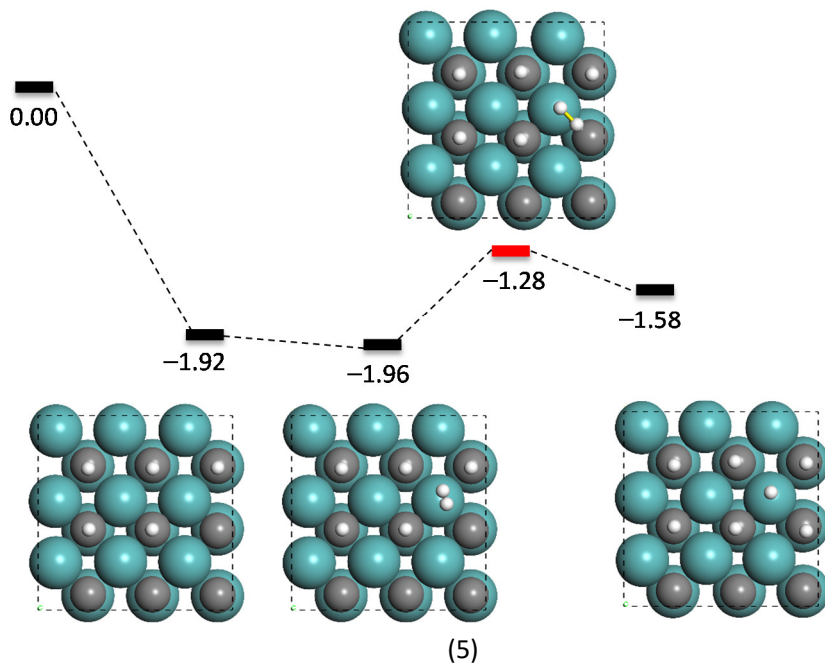

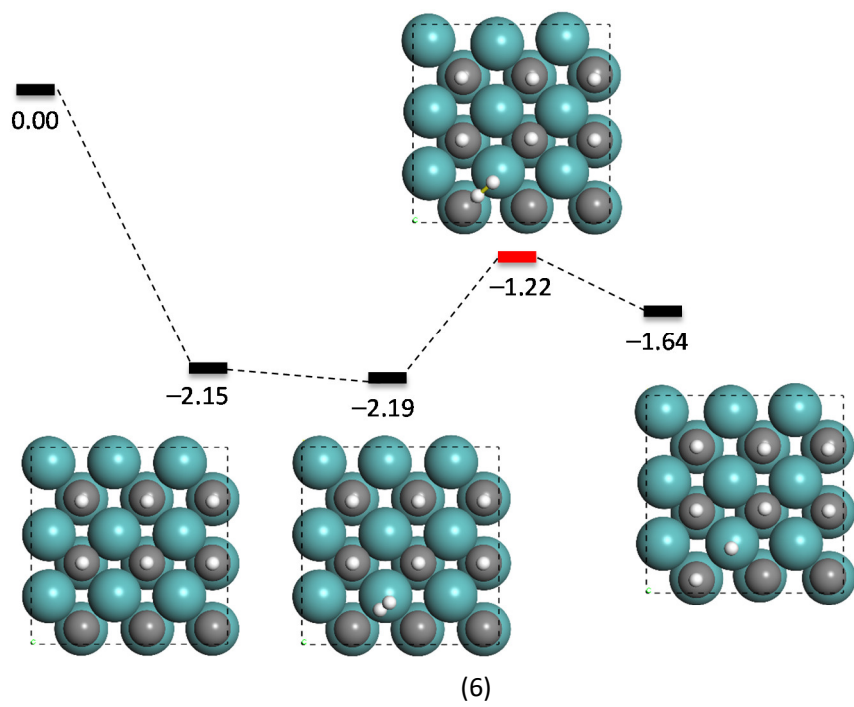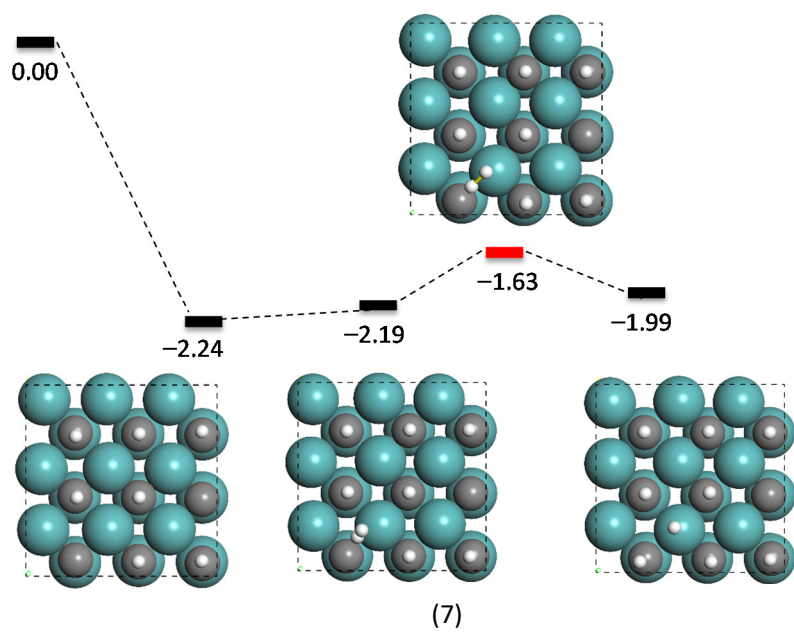

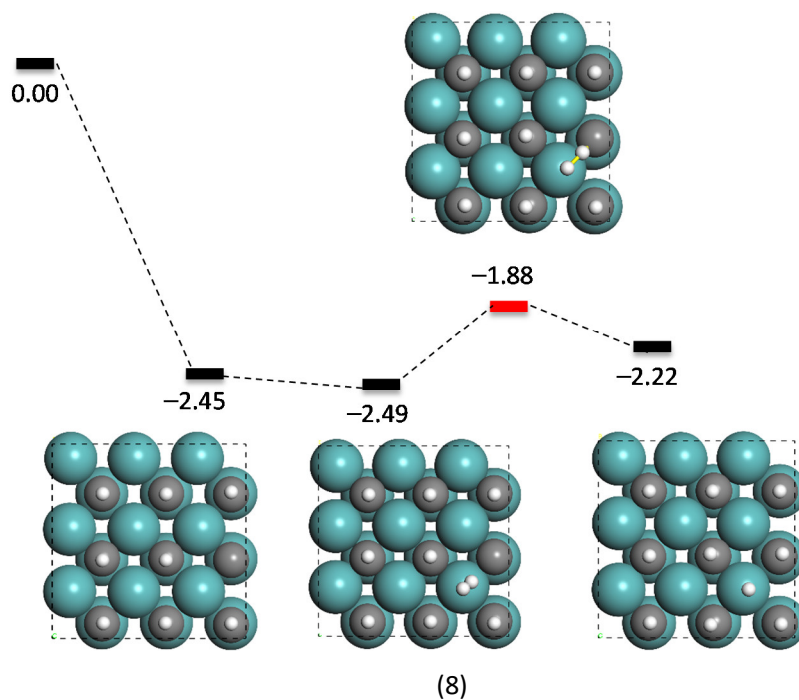

(8)

**Fig. S7** The potential energy profiles with ZPE correction for H-H bond breaking at different H\* coverage. Energies in eV with gas phase H<sub>2</sub>O and H<sub>2</sub> as reference.

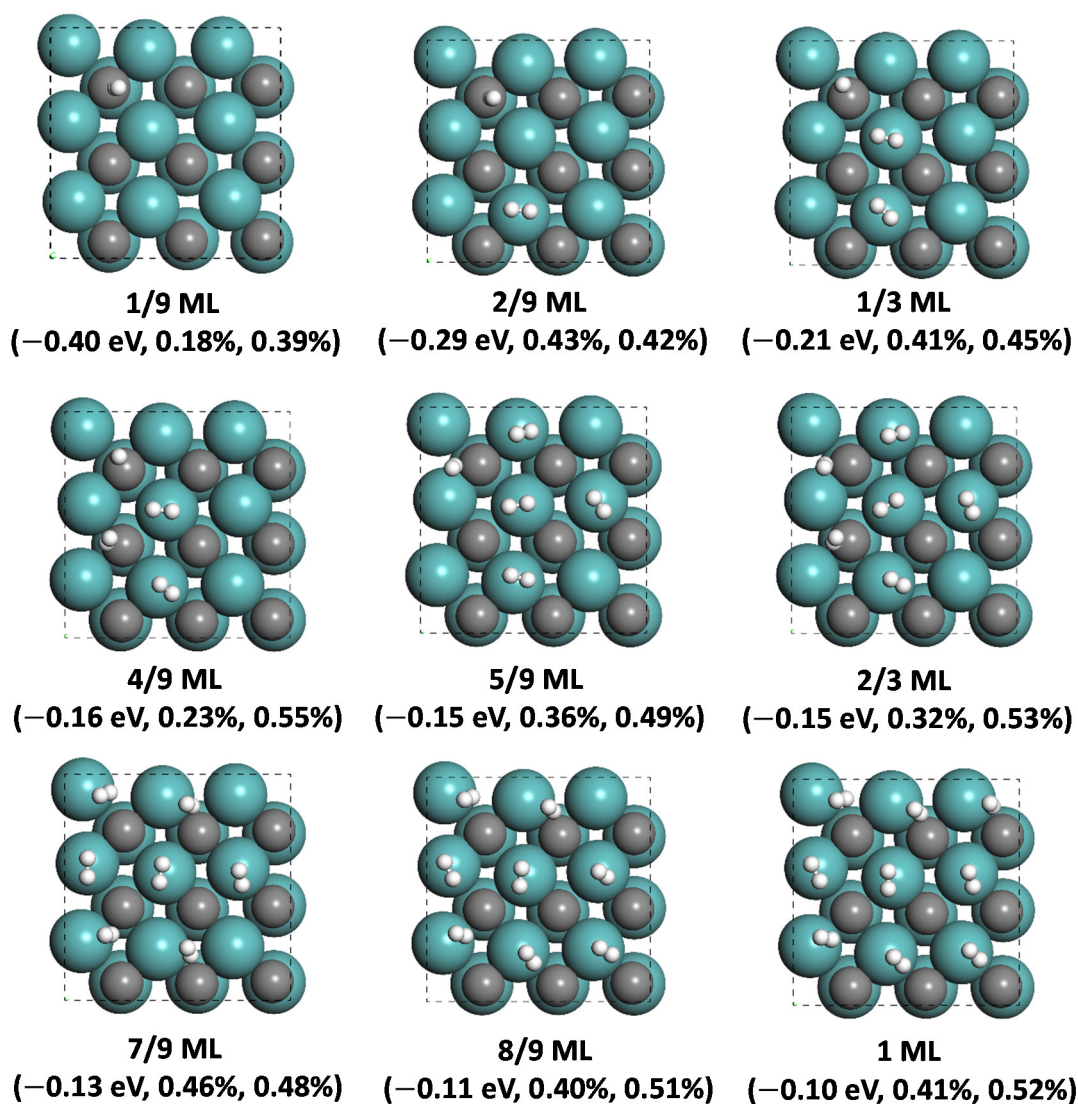

**Fig. S8** Configurations of H<sub>2</sub> adsorption, values in the parentheses from left to right represent average binding energies of H<sub>2</sub> ( $E_{AVG,n}^{H_2O}$ , n = 1-9), surface oxidation degree of Mo sites ( $OX_{Mo}$ ) and surface oxidation degree of C sites ( $OX_C$ ) at different coverage (1/9 – 1 ML, based on number of surface Mo sites) on fcc MoC (001) surface, respectively. Gaseous H<sub>2</sub> as energy reference.

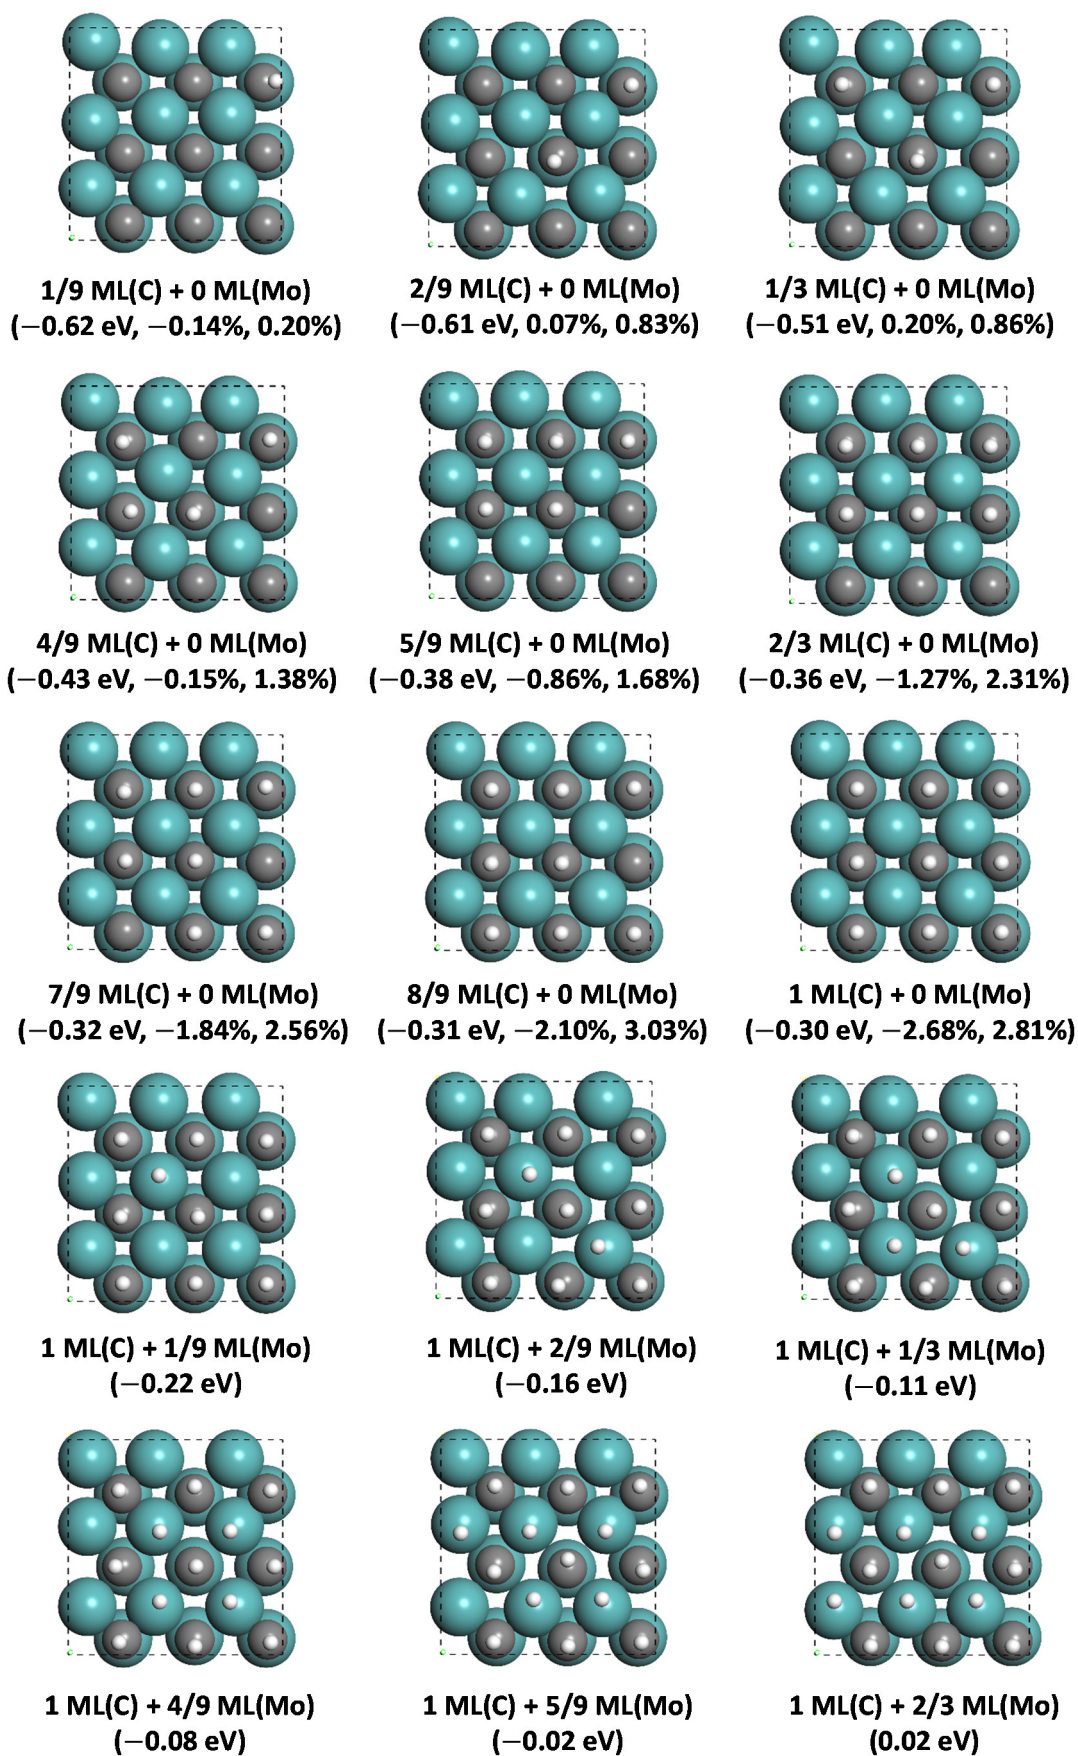

Fig. S9 Configurations of H\* species, values in the parentheses from left to right represent average



binding energies of  $H_2$  ( $E_{AVG,n}^{H_2O}$ ,  $n = 1-9$ ), surface oxidation degree of Mo sites ( $OX_{Mo}$ ) and surface oxidation degree of C sites ( $OX_C$ ) at different coverage ( $1/9 - 1$  ML, based on number of surface C and Mo sites, respectively) on fcc MoC (001) surface, respectively. Gaseous  $H_2$  as energy reference.

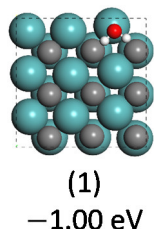

**Fig. S10** Configurations of  $H_2O^*$  (1/9 ML, based on number of surface Mo sites) and surface binding energy without ZPE correction. Gas phase  $H_2O$  and  $H_2$  as reference

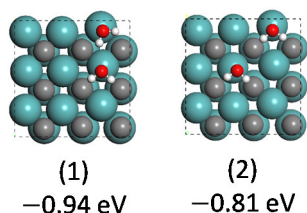

**Fig. S11** Configurations of  $H_2O^*$  (2/9 ML, based on number of surface Mo sites) and surface binding energy without ZPE correction. Gas phase  $H_2O$  and  $H_2$  as reference

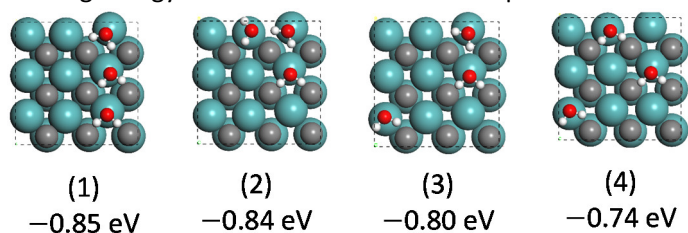

**Fig. S12** Configurations of  $H_2O^*$  (1/3 ML, based on number of surface Mo sites) and surface binding energy without ZPE correction. Gas phase  $H_2O$  and  $H_2$  as reference

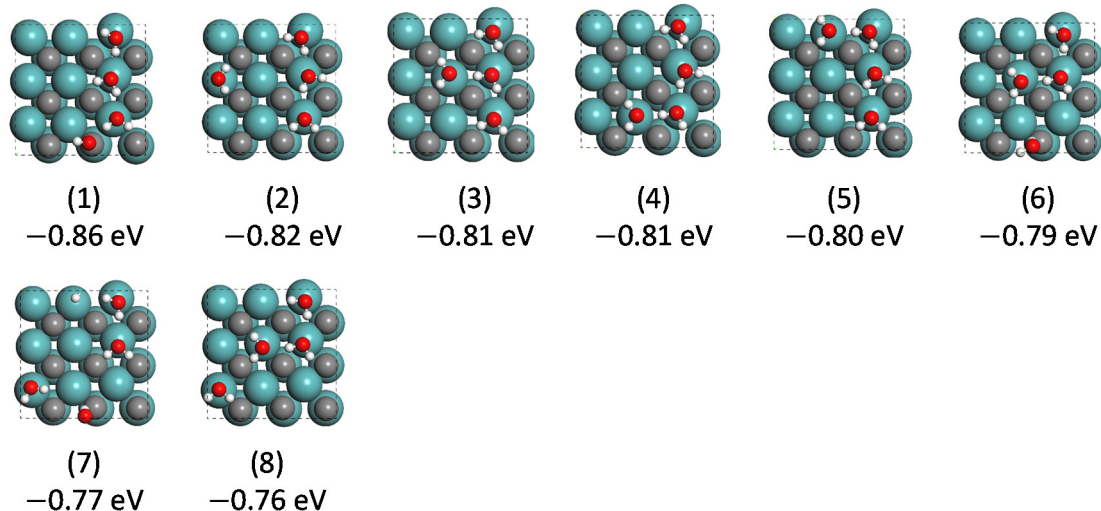

**Fig. S13** Configurations of  $H_2O^*$  (4/9 ML, based on number of surface Mo sites) and surface

binding energy without ZPE correction. Gas phase H<sub>2</sub>O and H<sub>2</sub> as reference

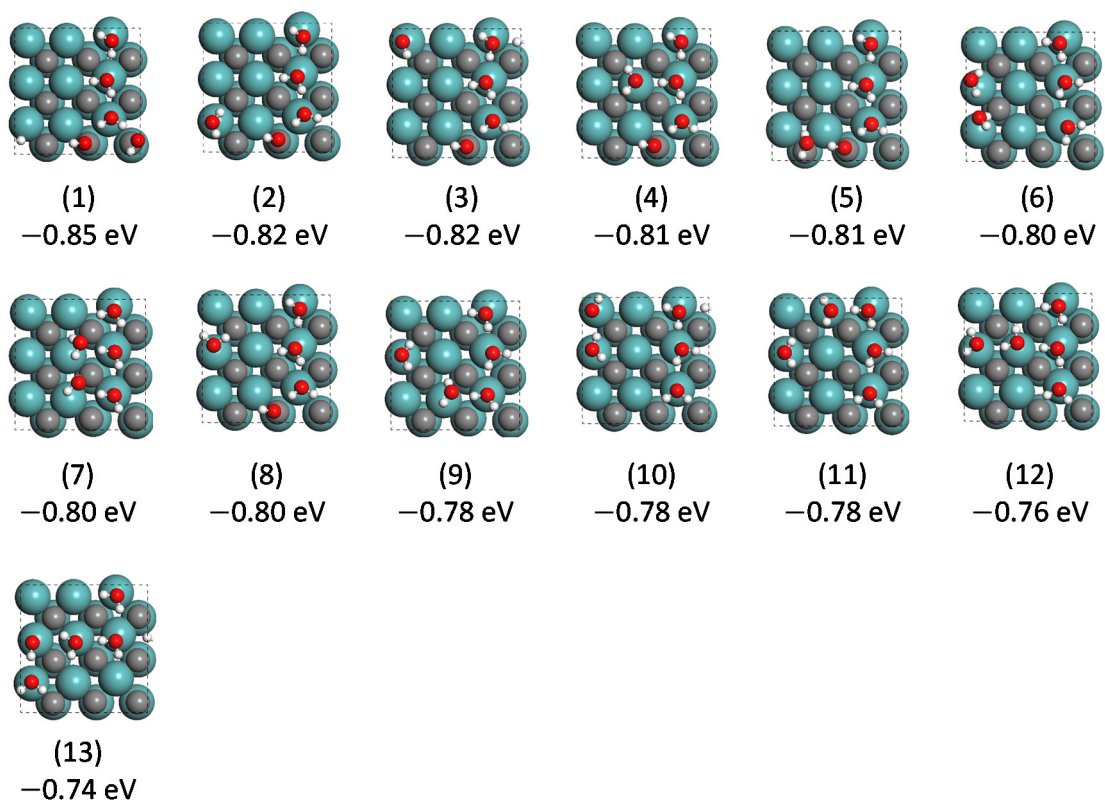

**Fig. S14** Configurations of H<sub>2</sub>O\* (5/9 ML, based on number of surface Mo sites) and surface binding energy without ZPE correction. Gas phase H<sub>2</sub>O and H<sub>2</sub> as reference

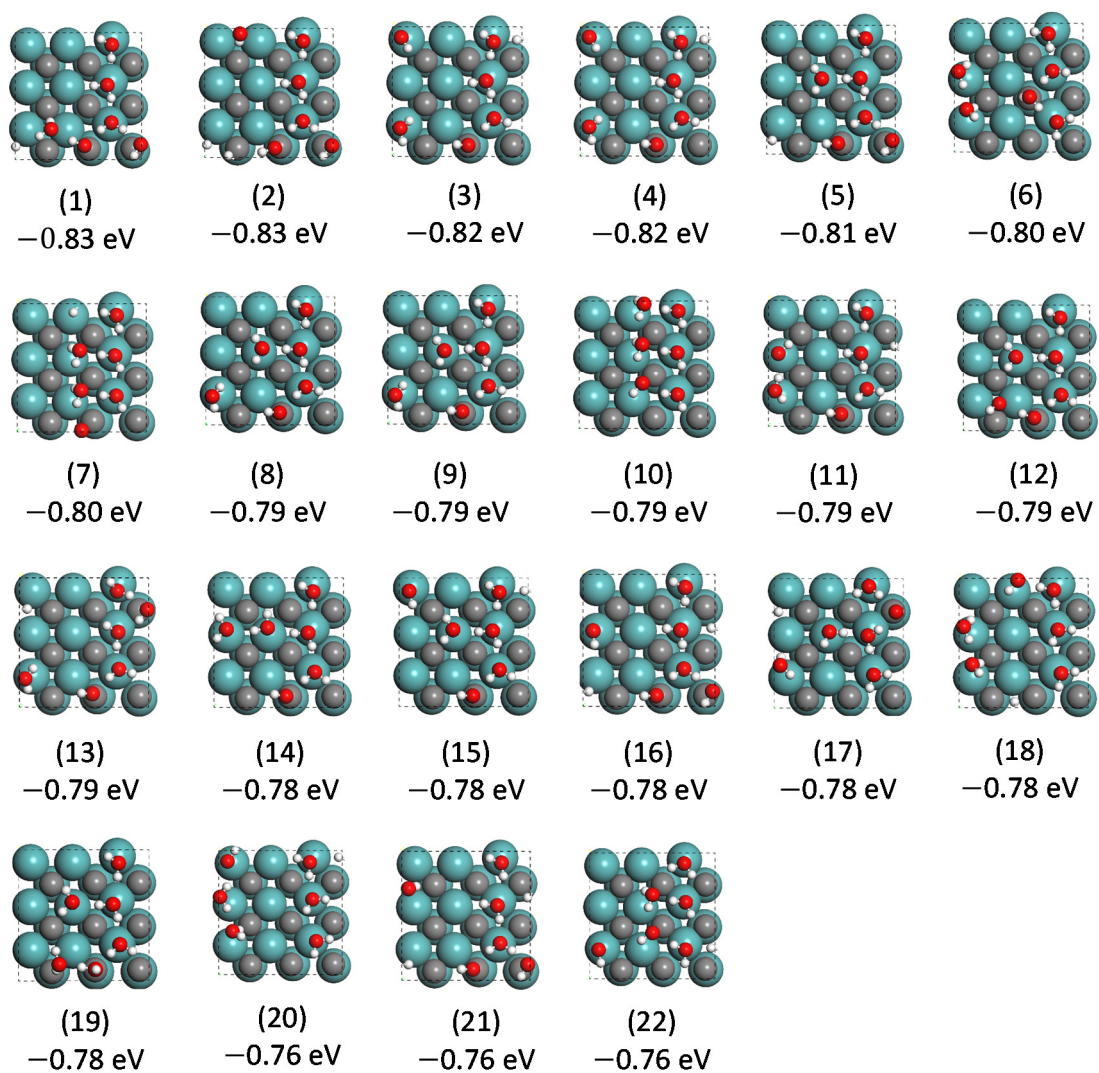

**Fig. S15** Configurations of  $\text{H}_2\text{O}^*$  (2/3 ML, based on number of surface Mo sites) and surface binding energy without ZPE correction. Gas phase  $\text{H}_2\text{O}$  and  $\text{H}_2$  as reference

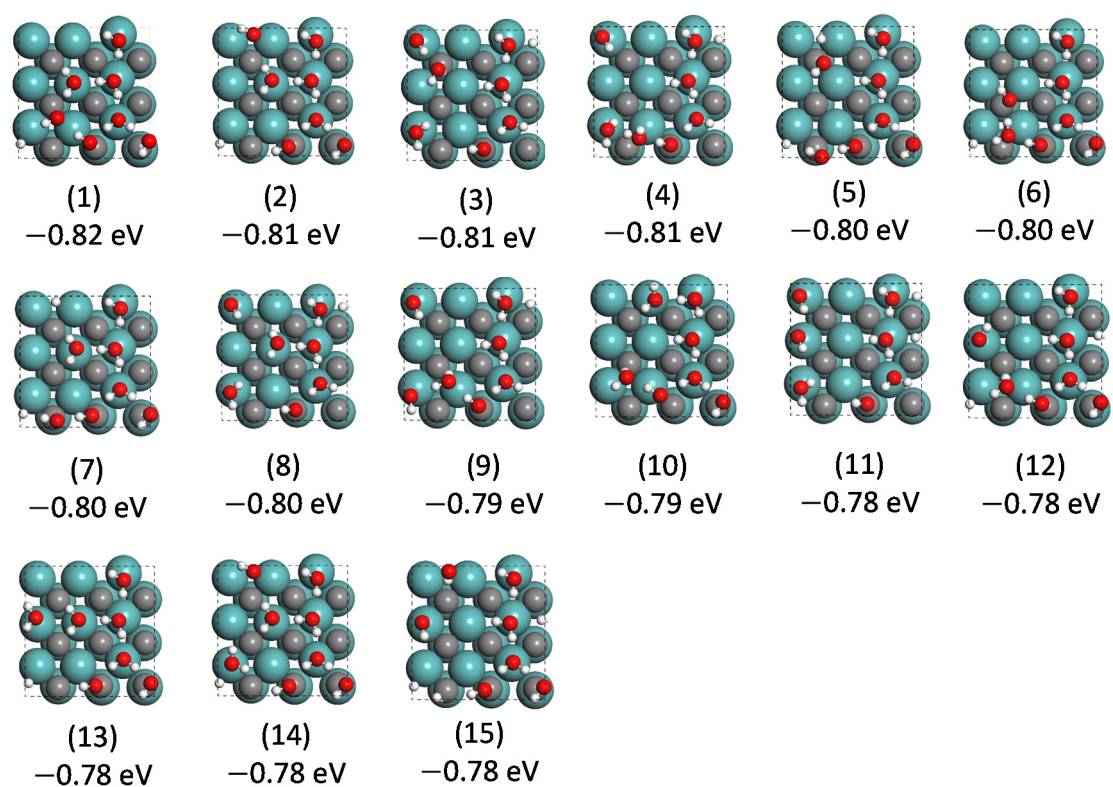

**Fig. S16** Configurations of H<sub>2</sub>O\* (7/9 ML, based on number of surface Mo sites) and surface binding energy without ZPE correction. Gas phase H<sub>2</sub>O and H<sub>2</sub> as reference

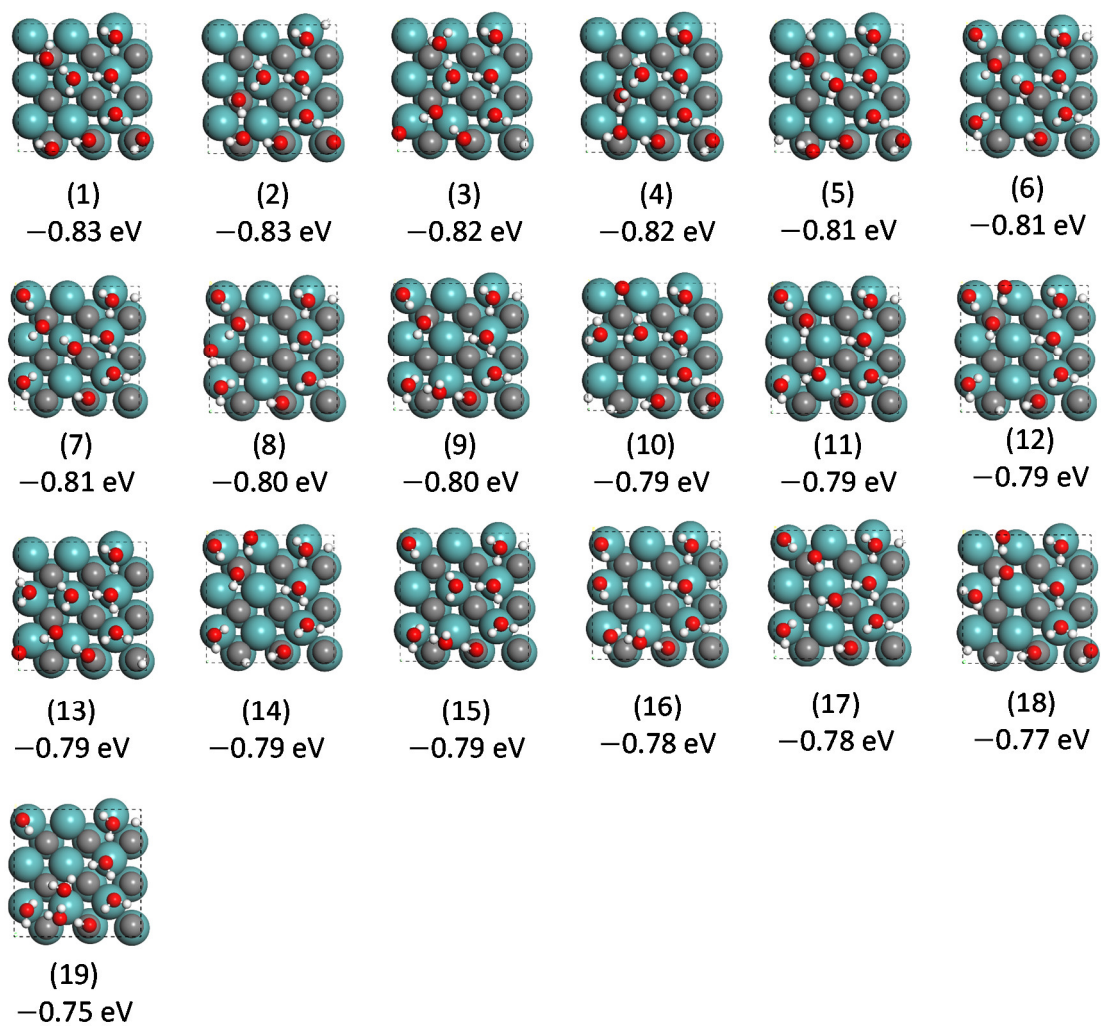

**Fig. S17** Configurations of  $\text{H}_2\text{O}^*$  (8/9 ML, based on number of surface Mo sites) and surface binding energy without ZPE correction. Gas phase  $\text{H}_2\text{O}$  and  $\text{H}_2$  as reference

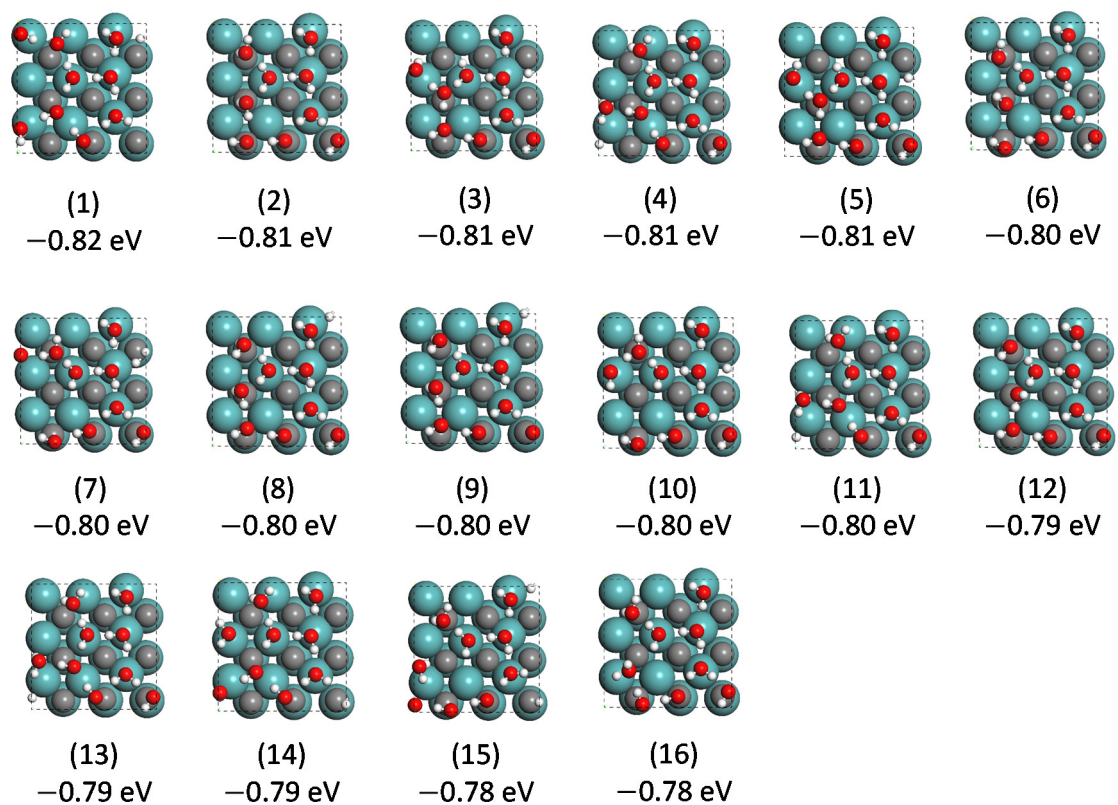

**Fig. S18** Configurations of  $\text{H}_2\text{O}^*$  (1 ML, based on number of surface Mo sites) and surface binding energy without ZPE correction. Gas phase  $\text{H}_2\text{O}$  and  $\text{H}_2$  as reference

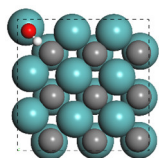

(1)  
0.40 eV

**Fig. S19** Configurations of OH\* (1/9 ML, based on number of surface Mo sites) and surface binding energy without ZPE correction. Gas phase H<sub>2</sub>O and H<sub>2</sub> as reference.

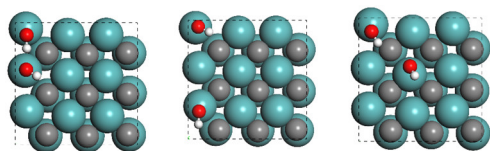

(1) (2) (3)  
-0.78 eV -0.74 eV -0.46 eV

**Fig. S20** Configurations of OH\* (2/9 ML, based on number of surface Mo sites) and surface binding energy without ZPE correction. Gas phase H<sub>2</sub>O and H<sub>2</sub> as reference.

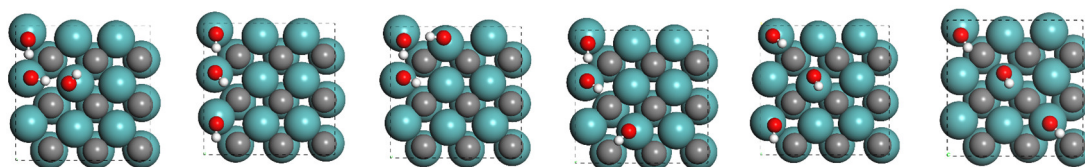

(1) (2) (3) (4) (5) (6)  
-0.89 eV -0.89 eV -0.83 eV -0.72 eV -0.51 eV -0.32 eV

**Fig. S21** Configurations of OH\* (1/3 ML, based on number of surface Mo sites) and surface binding energy without ZPE correction. Gas phase H<sub>2</sub>O and H<sub>2</sub> as reference.

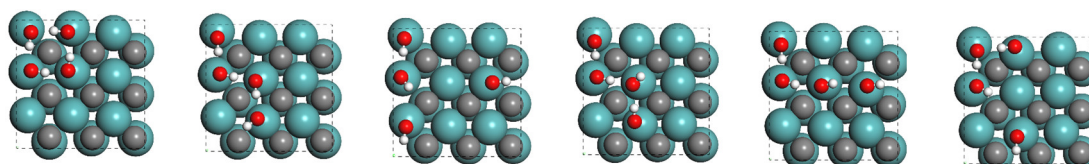

(1) (2) (3) (4) (5) (6)  
-1.31 eV -1.03 eV -0.98 eV -0.97 eV -0.96 eV -0.96 eV

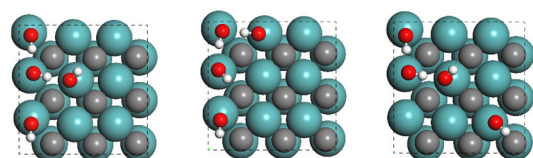

(7) (8) (9)  
-0.93 eV -0.88 eV -0.61 eV

**Fig. S22** Configurations of OH\* (4/9 ML, based on number of surface Mo sites) and surface binding energy without ZPE correction. Gas phase H<sub>2</sub>O and H<sub>2</sub> as reference.

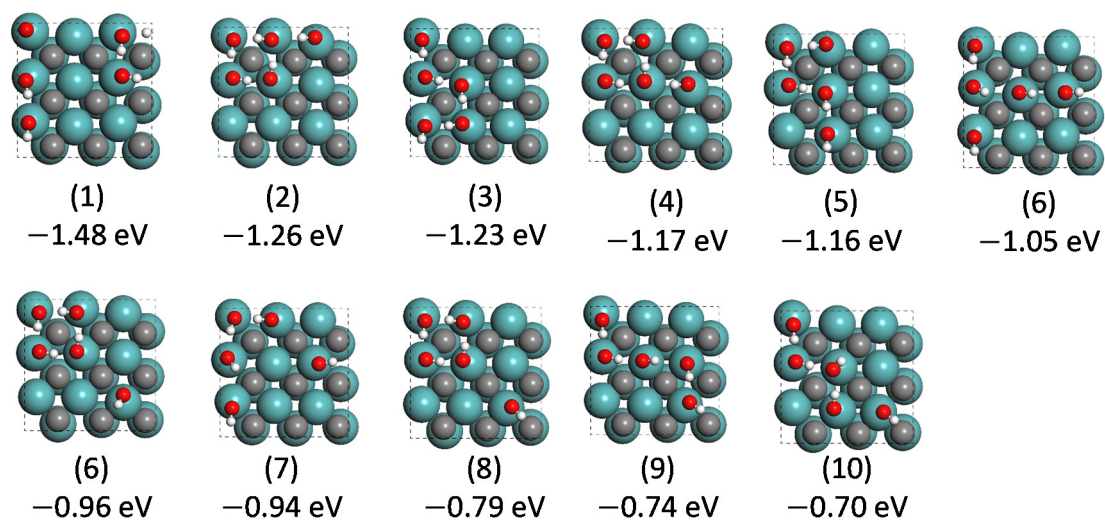

**Fig. S23** Configurations of OH\* (5/9 ML, based on number of surface Mo sites) and surface binding energy without ZPE correction. Gas phase H<sub>2</sub>O and H<sub>2</sub> as reference

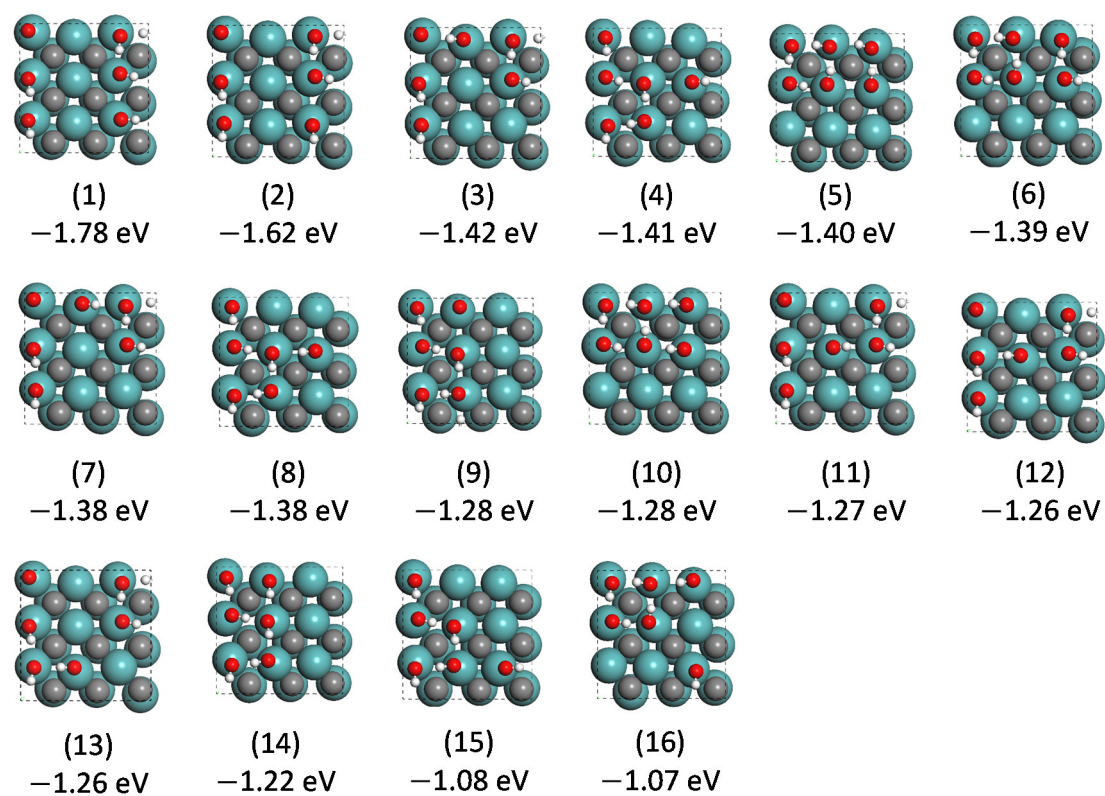

**Fig. S24** Configurations of OH\* (2/3 ML, based on number of surface Mo sites) and surface binding energy without ZPE correction. Gas phase H<sub>2</sub>O and H<sub>2</sub> as reference



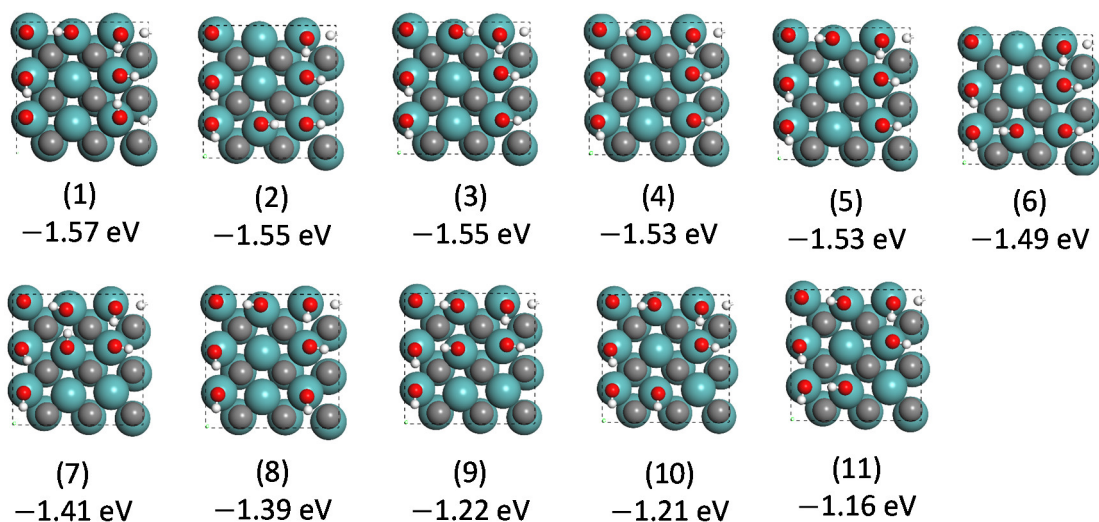

**Fig. S25** Configurations of OH\* (7/9 ML, based on number of surface Mo sites) and surface binding energy without ZPE correction. Gas phase H<sub>2</sub>O and H<sub>2</sub> as reference

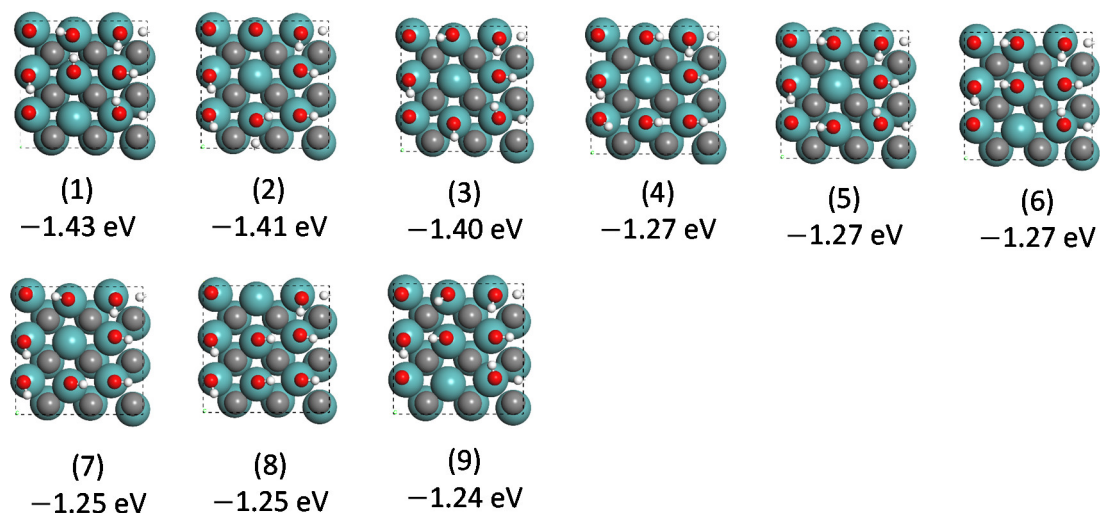

**Fig. S26** Configurations of OH\* (8/9 ML, based on number of surface Mo sites) and surface binding energy without ZPE correction. Gas phase H<sub>2</sub>O and H<sub>2</sub> as reference

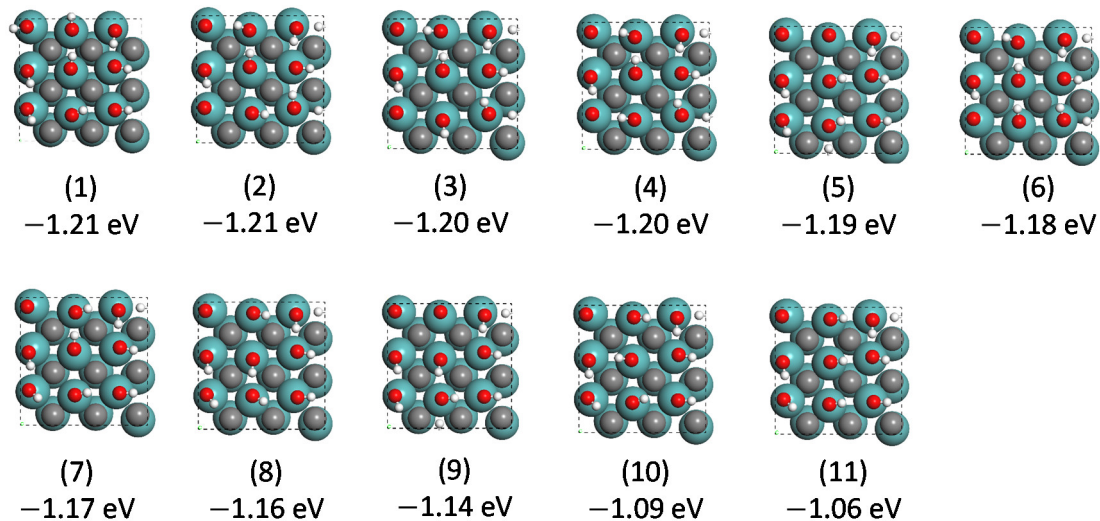

**Fig. S27** Configurations of OH\* (1 ML, based on number of surface Mo sites) and surface binding

energy without ZPE correction. Gas phase H<sub>2</sub>O and H<sub>2</sub> as reference

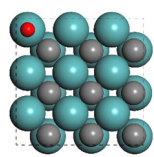

(1)  
0.17 eV

**Fig. S28** Configurations of O\* (1/9 ML, based on number of surface Mo sites) and surface binding energy without ZPE correction. Gas phase H<sub>2</sub>O and H<sub>2</sub> as reference

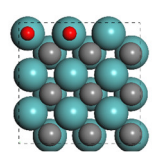

(1)  
0.20 eV

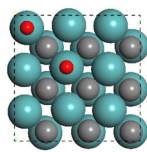

(2)  
0.22 eV

**Fig. S29** Configurations of O\* (2/9 ML, based on number of surface Mo sites) and surface binding energy without ZPE correction. Gas phase H<sub>2</sub>O and H<sub>2</sub> as reference

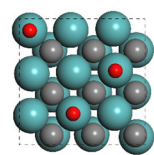

(1)  
0.28 eV

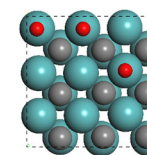

(2)  
0.32 eV

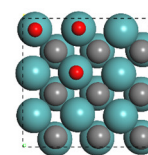

(3)  
0.37 eV

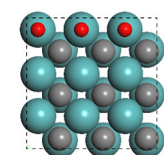

(3)  
0.38 eV

**Fig. S30** Configurations of O\* (1/3 ML, based on number of surface Mo sites) and surface binding energy without ZPE correction. Gas phase H<sub>2</sub>O and H<sub>2</sub> as reference

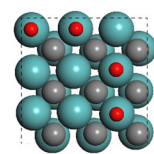

(1)  
0.39 eV

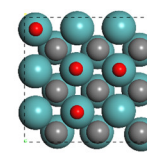

(2)  
0.40 eV

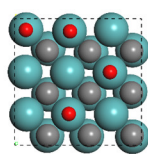

(3)  
0.40 eV

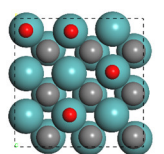

(4)  
0.40 eV

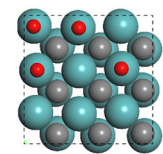

(5)  
0.42 eV

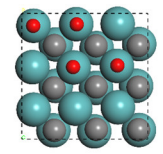

(6)  
0.42 eV

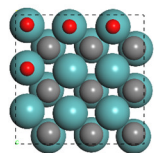

(7)  
0.45 eV

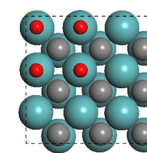

(8)  
0.47 eV

**Fig. S31** Configurations of O\* (4/9 ML, based on number of surface Mo sites) and surface binding energy without ZPE correction. Gas phase H<sub>2</sub>O and H<sub>2</sub> as reference

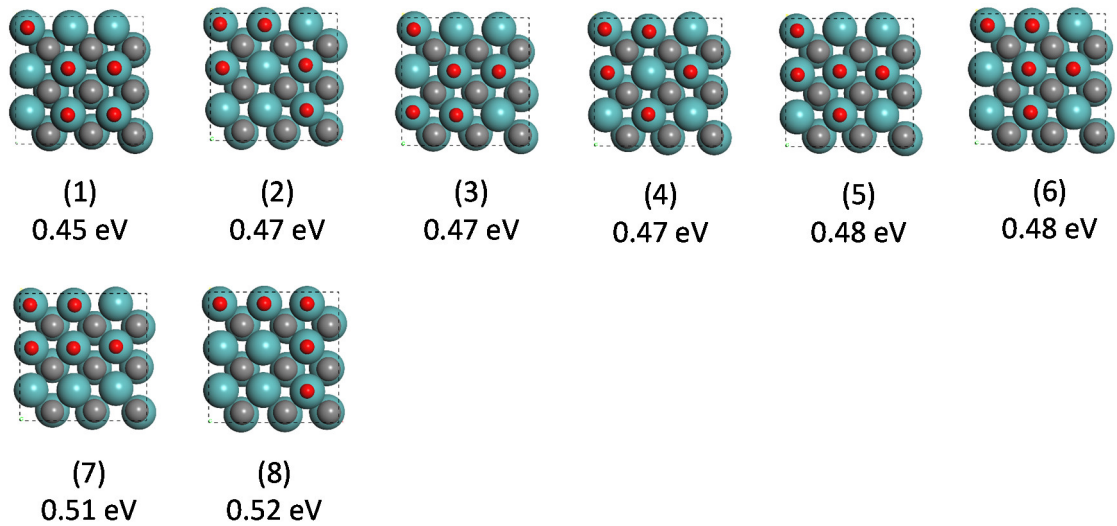

**Fig. S32** Configurations of O\* (5/9 ML, based on number of surface Mo sites) and surface binding energy without ZPE correction. Gas phase H<sub>2</sub>O and H<sub>2</sub> as reference

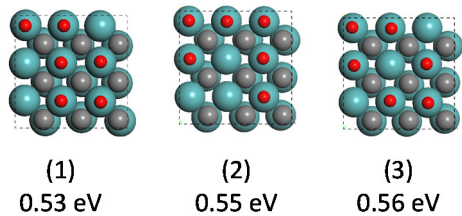

**Fig. S33** Configurations of O\* (2/3 ML, based on number of surface Mo sites) and surface binding energy without ZPE correction. Gas phase H<sub>2</sub>O and H<sub>2</sub> as reference

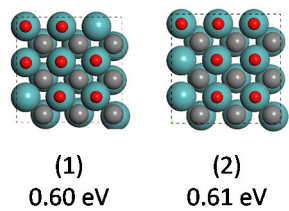

**Fig. S34** Configurations of O\* (7/9 ML, based on number of surface Mo sites) and surface binding energy without ZPE correction. Gas phase H<sub>2</sub>O and H<sub>2</sub> as reference

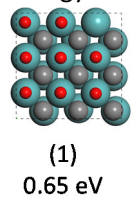

**Fig. S35** Configurations of O\* (8/9 ML, based on number of surface Mo sites) and surface binding energy without ZPE correction. Gas phase H<sub>2</sub>O and H<sub>2</sub> as reference

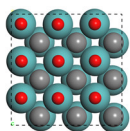

(1)  
0.72 eV

**Fig. S36** Configurations of O\* (1 ML, based on number of surface Mo sites) and surface binding energy without ZPE correction. Gas phase H<sub>2</sub>O and H<sub>2</sub> as reference

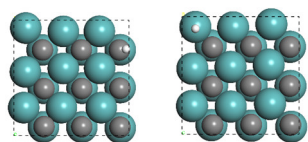

(1)      (2)  
-0.73 eV    -0.07 eV

**Fig. S37** Configurations of H\* (1/9 ML, based on number of surface Mo sites) and surface binding energy without ZPE correction. Gas phase H<sub>2</sub>O and H<sub>2</sub> as reference

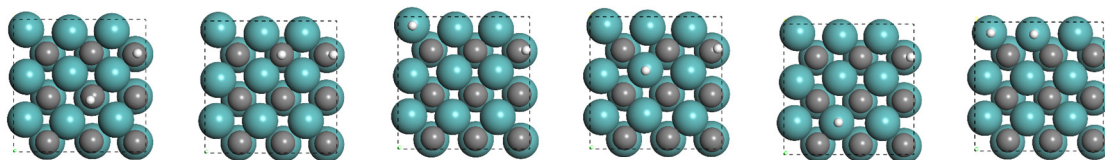

(1)      (2)      (3)      (4)      (5)      (6)  
-0.73 eV    -0.52 eV    -0.31 eV    -0.24 eV    -0.22 eV    0.03 eV

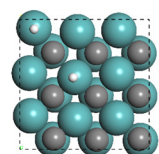

(6)  
0.05 eV

**Fig. S38** Configurations of H\* (2/9 ML, based on number of surface Mo sites) and surface binding energy without ZPE correction. Gas phase H<sub>2</sub>O and H<sub>2</sub> as reference

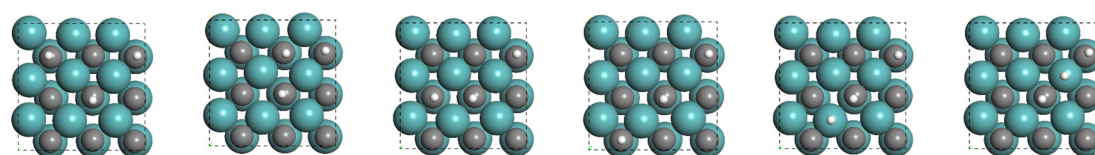

(1)      (2)      (3)      (4)      (5)      (6)  
-0.63 eV    -0.62 eV    -0.62 eV    -0.57 eV    -0.38 eV    -0.37 eV

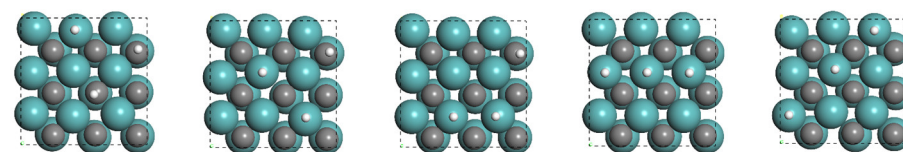

(7)      (8)      (9)      (10)      (11)  
-0.35 eV    -0.14 eV    -0.11 eV    0.10 eV    0.12 eV

**Fig. S39** Configurations of H\* (1/3 ML, based on number of surface Mo sites) and surface binding energy without ZPE correction. Gas phase H<sub>2</sub>O and H<sub>2</sub> as reference

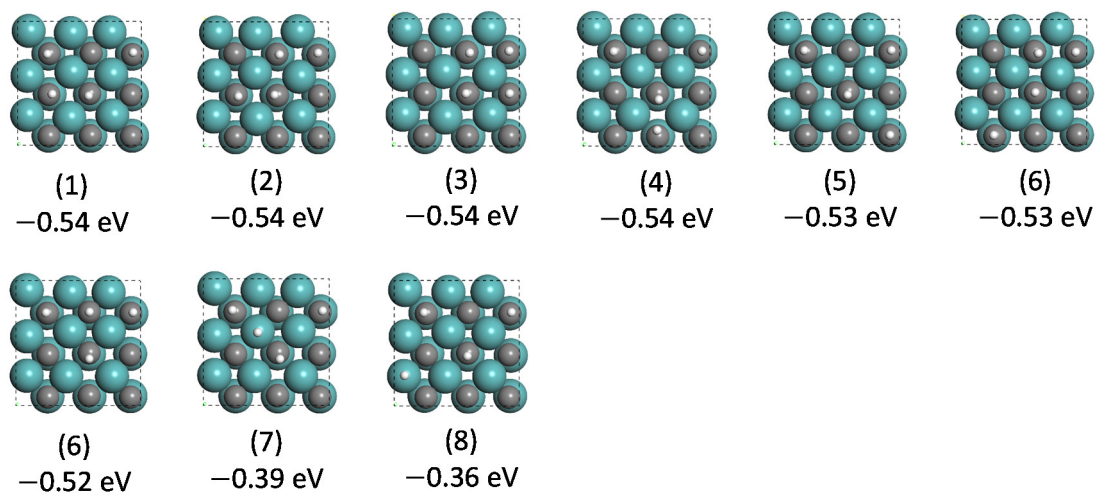

**Fig. S40** Configurations of H\* (4/9 ML, based on number of surface Mo sites) and surface binding energy without ZPE correction. Gas phase H<sub>2</sub>O and H<sub>2</sub> as reference

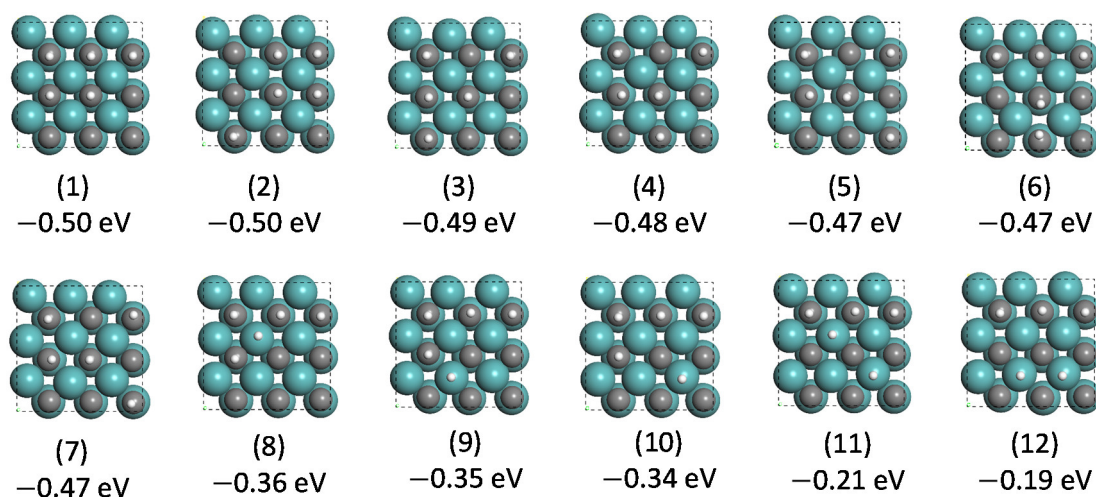

**Fig. S41** Configurations of H\* (5/9 ML, based on number of surface Mo sites) and surface binding energy without ZPE correction. Gas phase H<sub>2</sub>O and H<sub>2</sub> as reference

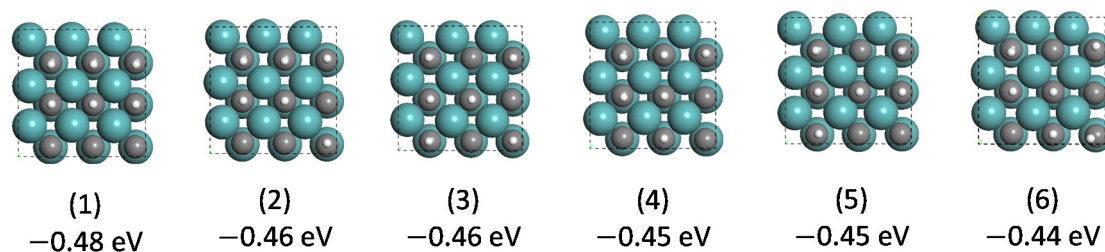

**Fig. S42** Configurations of H\* (2/3 ML, based on number of surface Mo sites) and surface binding energy without ZPE correction. Gas phase H<sub>2</sub>O and H<sub>2</sub> as reference

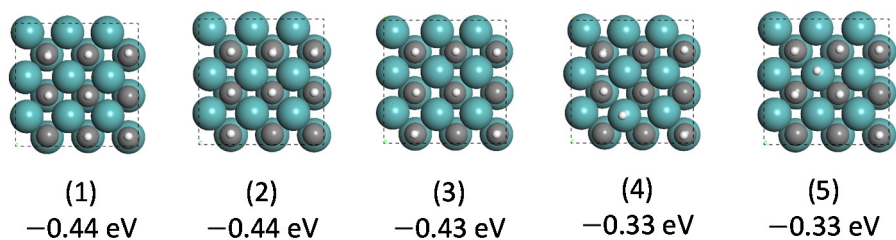

**Fig. S43** Configurations of H\* (7/9 ML, based on number of surface Mo sites) and surface binding energy without ZPE correction. Gas phase H<sub>2</sub>O and H<sub>2</sub> as reference

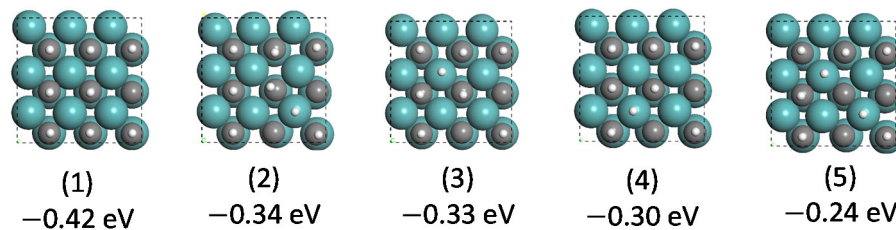

**Fig. S44** Configurations of H\* (8/9 ML, based on number of surface Mo sites) and surface binding energy without ZPE correction. Gas phase H<sub>2</sub>O and H<sub>2</sub> as reference

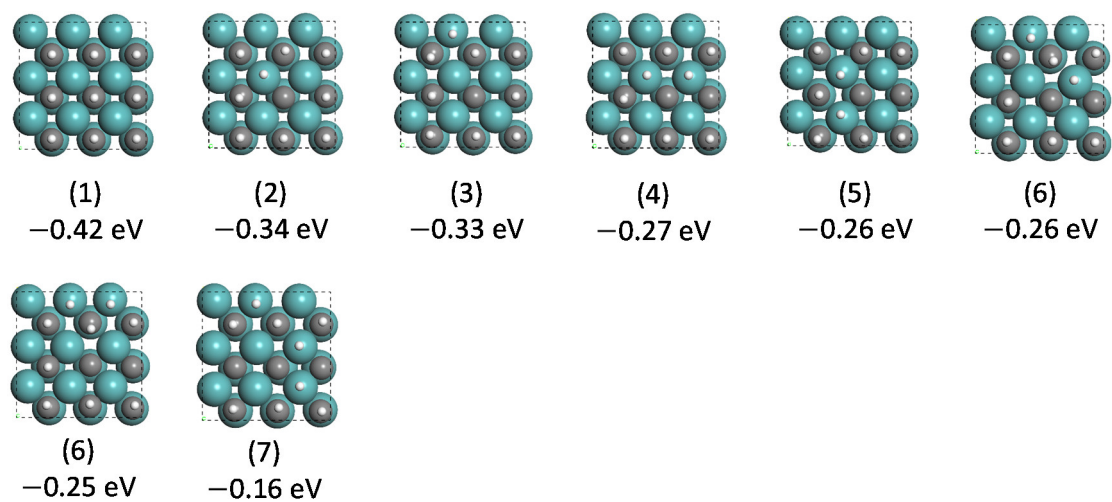

**Fig. S45** Configurations of H\* (1 ML, based on number of surface Mo sites) and surface binding energy without ZPE correction. Gas phase H<sub>2</sub>O and H<sub>2</sub> as reference

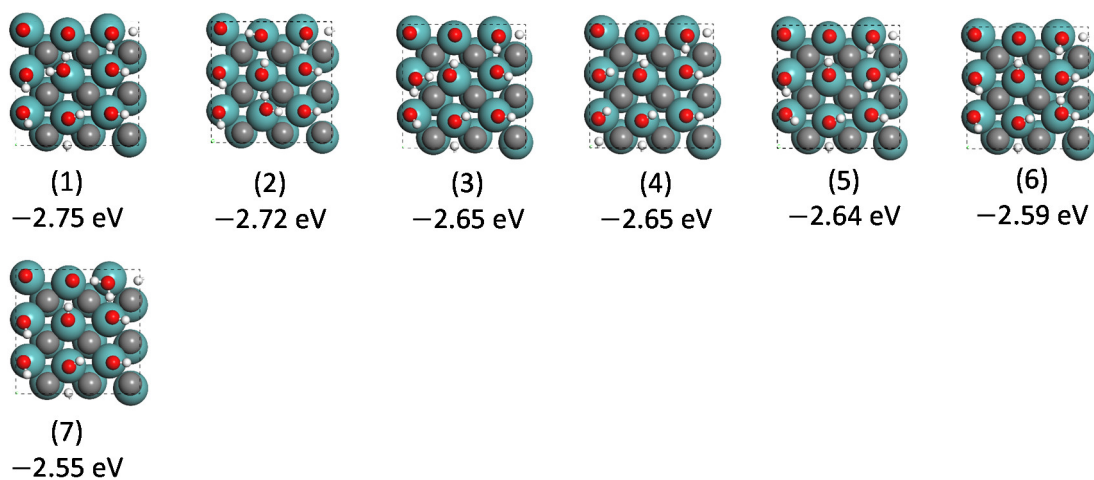

**Fig. S46** Configurations of 8OH\_1H<sub>2</sub>O (mixed 8/9 ML OH and 1/9 ML H<sub>2</sub>O) and surface energies without ZPE correction. Gas phase H<sub>2</sub>O and H<sub>2</sub> as reference

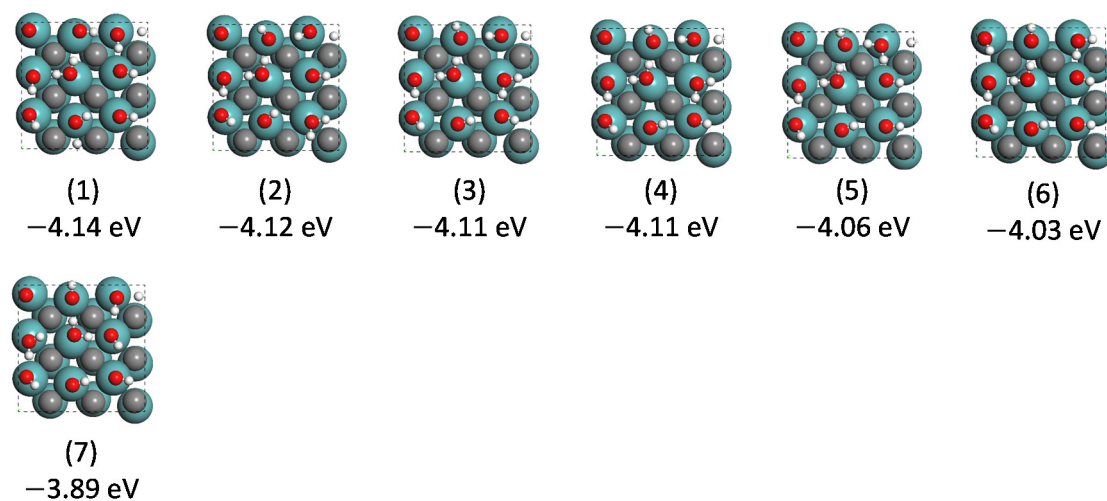

**Fig. S47** Configurations of 7OH\_2H<sub>2</sub>O (mixed 7/9 ML OH and 2/9 ML H<sub>2</sub>O) and surface energies without ZPE correction. Gas phase H<sub>2</sub>O and H<sub>2</sub> as reference

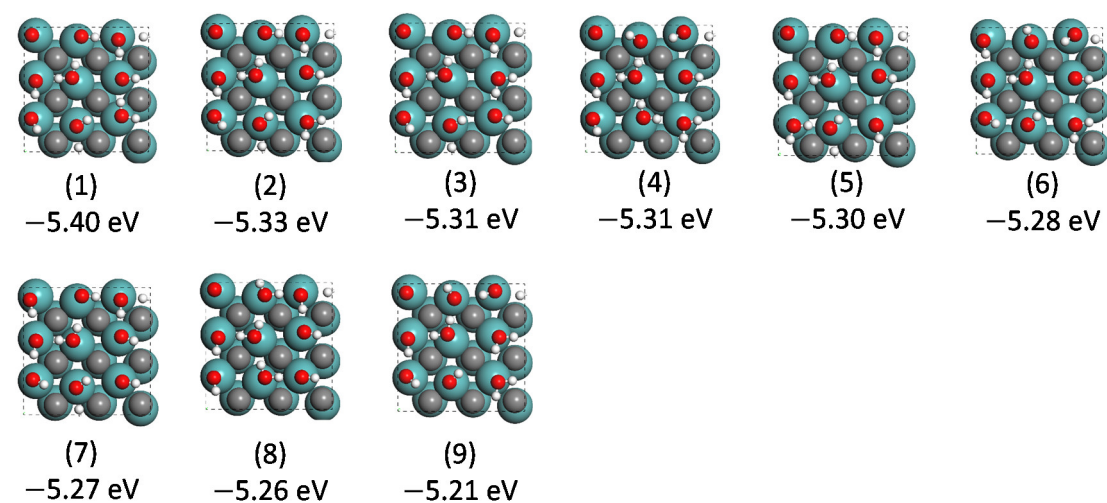

**Fig. S48** Configurations of 6OH\_3H<sub>2</sub>O (mixed 2/3 ML OH and 1/3 ML H<sub>2</sub>O) and surface energies without ZPE correction. Gas phase H<sub>2</sub>O and H<sub>2</sub> as reference

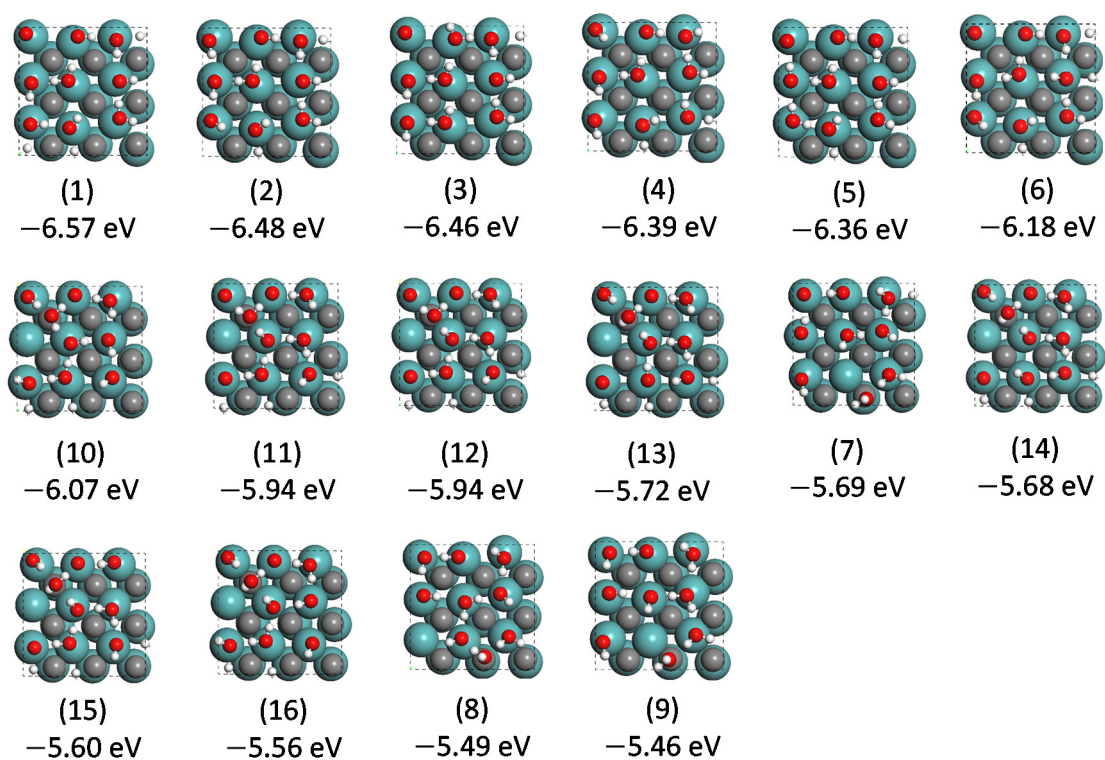

**Fig. S49** Configurations of 5OH\_4H<sub>2</sub>O (mixed 5/9 ML OH and 4/9 ML H<sub>2</sub>O) and surface energies without ZPE correction. Gas phase H<sub>2</sub>O and H<sub>2</sub> as reference

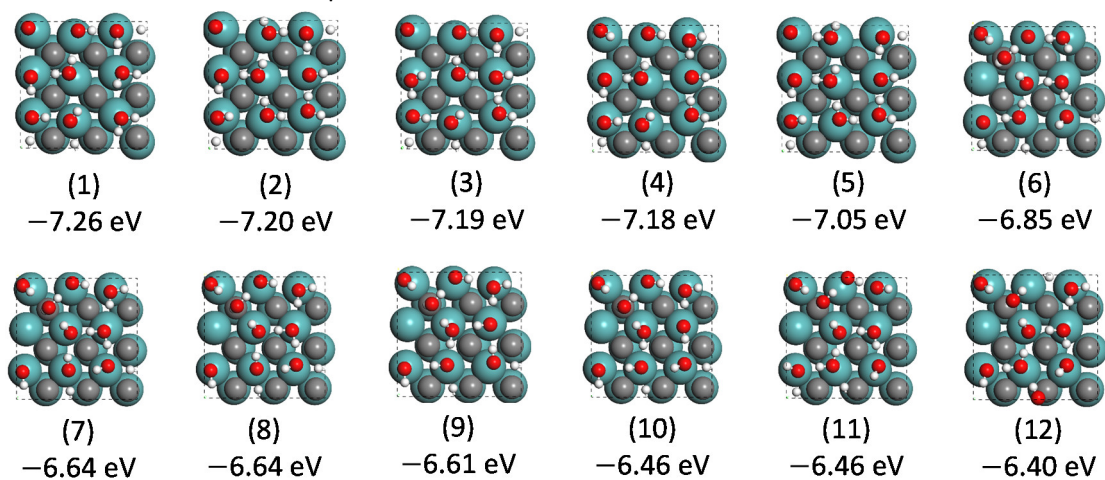

**Fig. S50** Configurations of 4OH\_5H<sub>2</sub>O (mixed 4/9 ML OH and 5/9 ML H<sub>2</sub>O) and surface energies without ZPE correction. Gas phase H<sub>2</sub>O and H<sub>2</sub> as reference



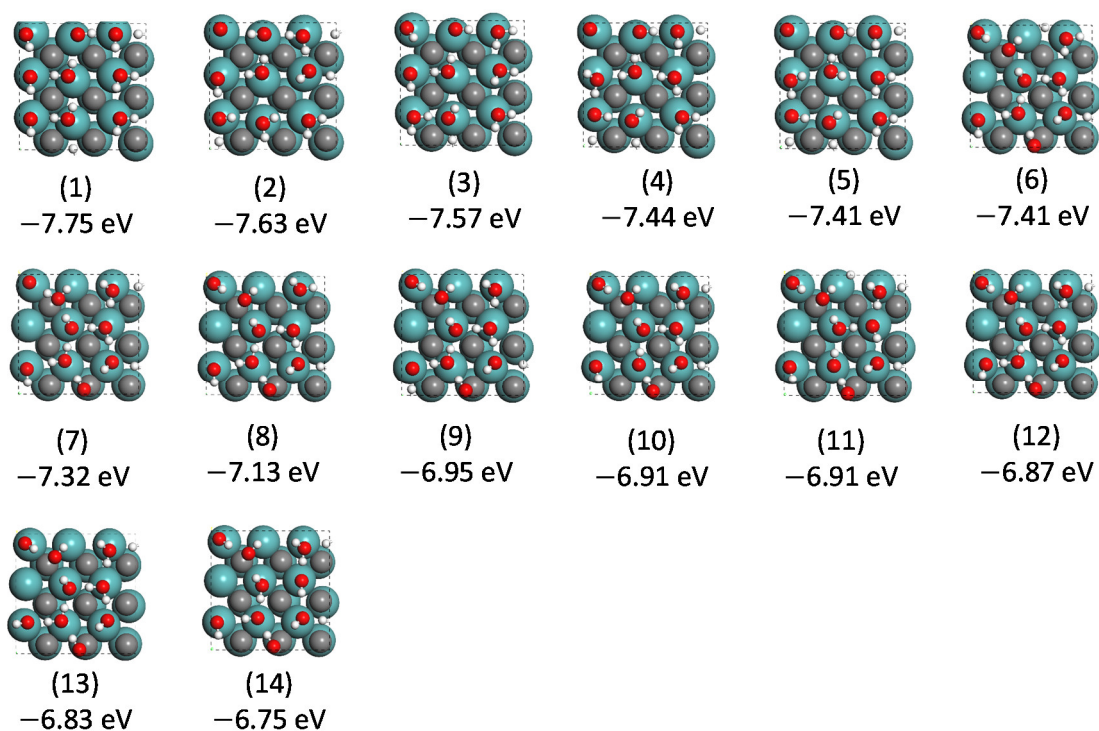

**Fig. S51** Configurations of 3OH\_6H<sub>2</sub>O (mixed 1/3 ML OH and 2/3 ML H<sub>2</sub>O) and surface energies without ZPE correction. Gas phase H<sub>2</sub>O and H<sub>2</sub> as reference

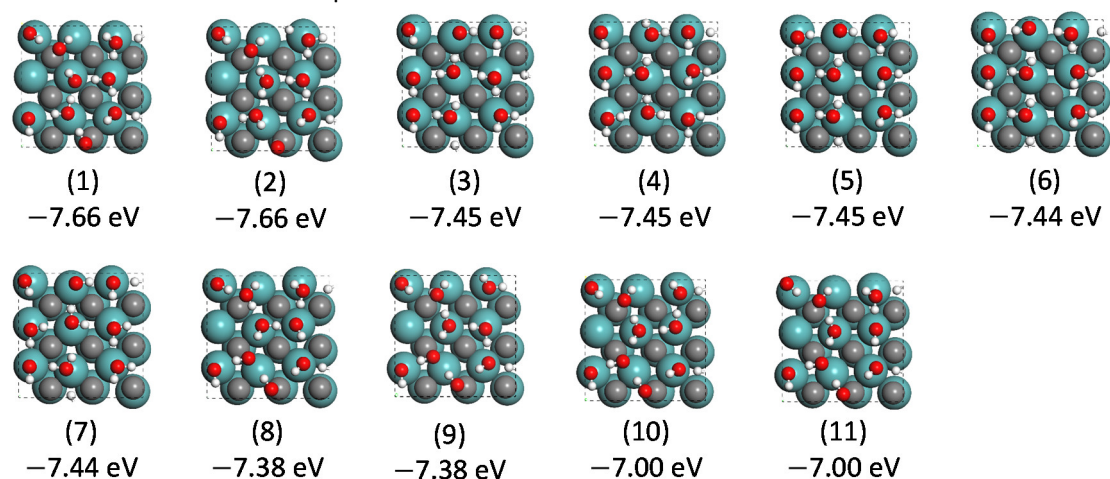

**Fig. S52** Configurations of 2OH\_7H<sub>2</sub>O (mixed 2/9 ML OH and 7/9 ML H<sub>2</sub>O) and surface energies without ZPE correction. Gas phase H<sub>2</sub>O and H<sub>2</sub> as reference

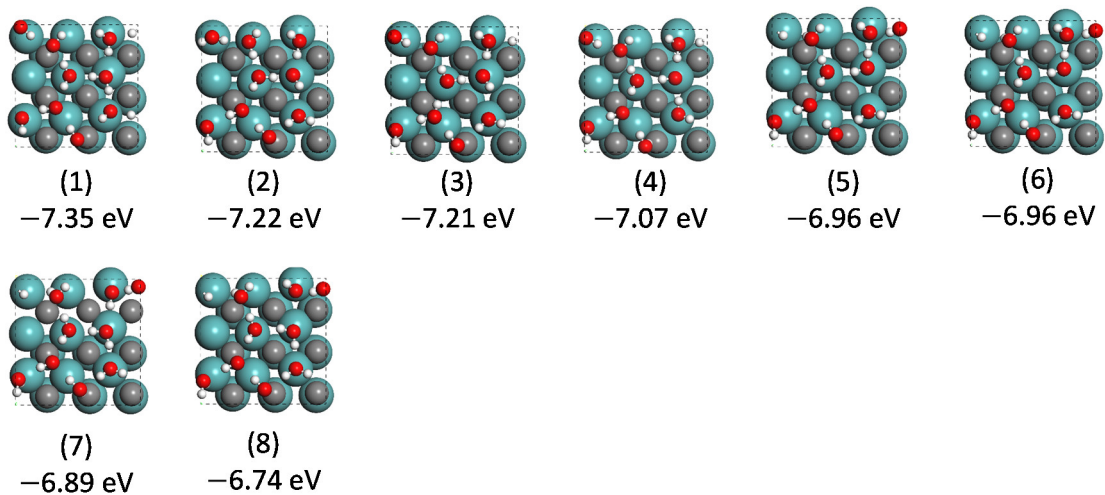

**Fig. S53** Configurations of 10OH\_8H<sub>2</sub>O (mixed 1/9 ML OH and 8/9 ML H<sub>2</sub>O) and surface energies without ZPE correction. Gas phase H<sub>2</sub>O and H<sub>2</sub> as reference

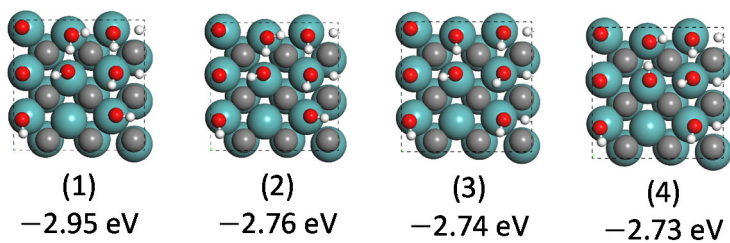

**Fig. S54** Configurations of 7OH\_1H<sub>2</sub>O (mixed 7/9 ML OH and 1/9 ML H<sub>2</sub>O) and surface energies without ZPE correction. Gas phase H<sub>2</sub>O and H<sub>2</sub> as reference

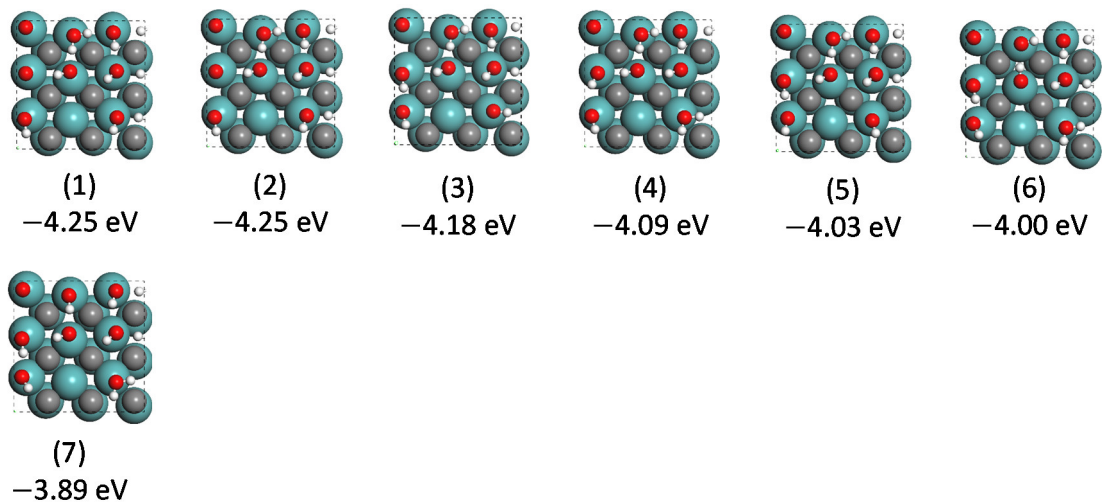

**Fig. S55** Configurations of 6OH\_2H<sub>2</sub>O (mixed 2/3 ML OH and 2/9 ML H<sub>2</sub>O) and surface energies without ZPE correction. Gas phase H<sub>2</sub>O and H<sub>2</sub> as reference

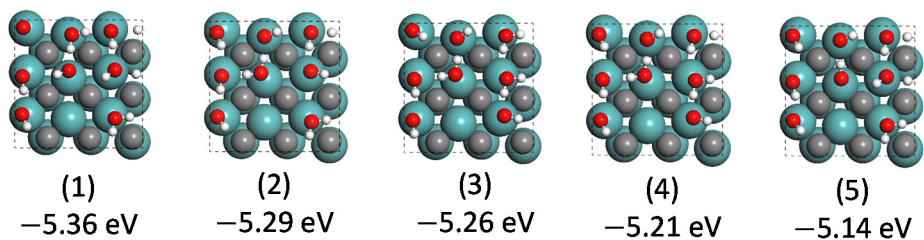

**Fig. S56** Configurations of 5OH\_3H<sub>2</sub>O (mixed 5/9 ML OH and 1/3 ML H<sub>2</sub>O) and surface energies without ZPE correction. Gas phase H<sub>2</sub>O and H<sub>2</sub> as reference

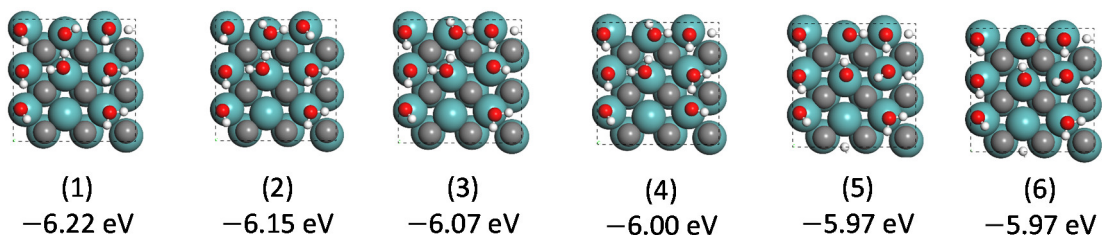

**Fig. S57** Configurations of 4OH\_4H<sub>2</sub>O (mixed 4/9 ML OH and 4/9 ML H<sub>2</sub>O) and surface energies without ZPE correction. Gas phase H<sub>2</sub>O and H<sub>2</sub> as reference

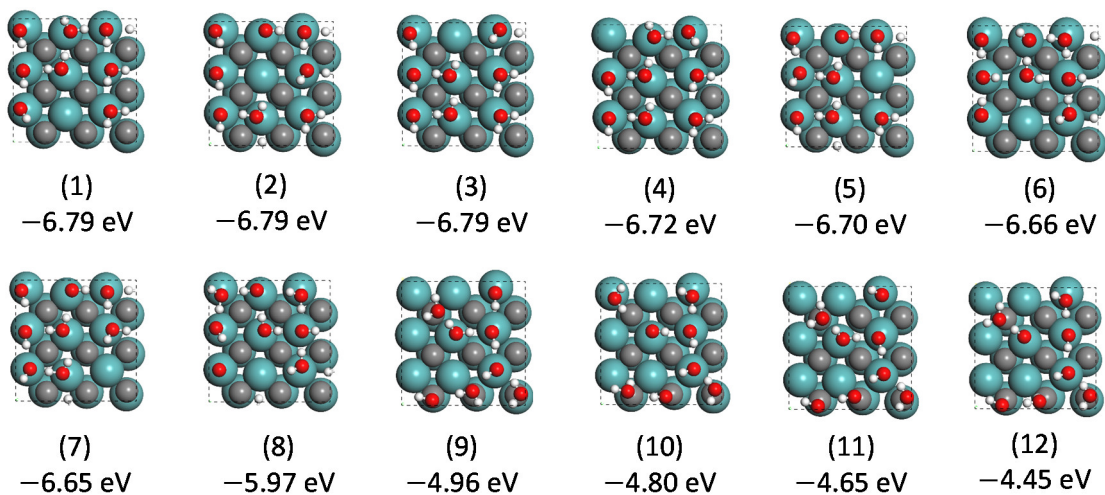

**Fig. S58** Configurations of 3OH\_5H<sub>2</sub>O (mixed 1/3 ML OH and 5/9 ML H<sub>2</sub>O) and surface energies without ZPE correction. Gas phase H<sub>2</sub>O and H<sub>2</sub> as reference

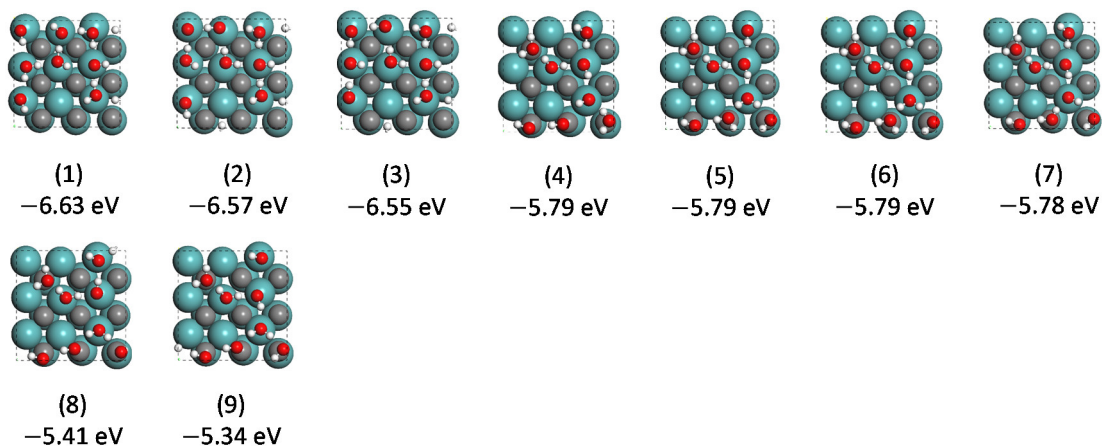

**Fig. S59** Configurations of 2OH\_6H<sub>2</sub>O (mixed 2/9 ML OH and 2/3 ML H<sub>2</sub>O) and surface energies without ZPE correction. Gas phase H<sub>2</sub>O and H<sub>2</sub> as reference

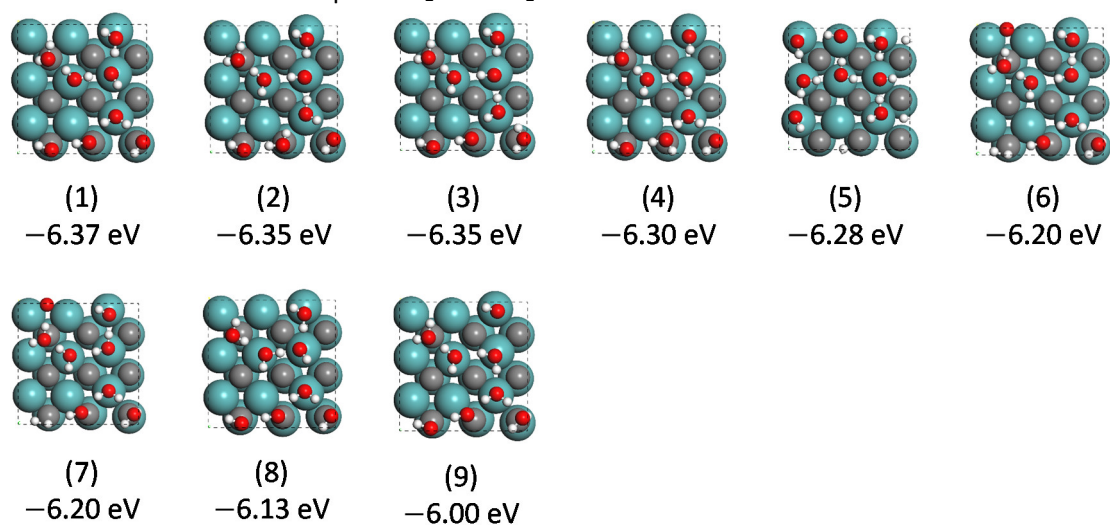

**Fig. S60** Configurations of 1OH\_7H<sub>2</sub>O (mixed 1/9 ML OH and 7/9 ML H<sub>2</sub>O) and surface energies without ZPE correction. Gas phase H<sub>2</sub>O and H<sub>2</sub> as reference

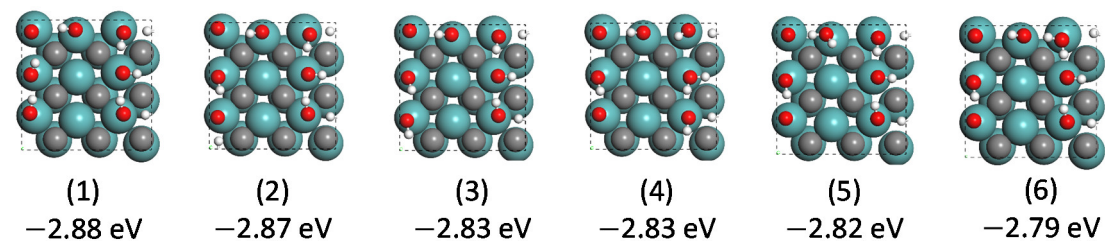

**Fig. S61** Configurations of 6OH\_1H<sub>2</sub>O (mixed 2/3 ML OH and 1/9 ML H<sub>2</sub>O) and surface energies without ZPE correction. Gas phase H<sub>2</sub>O and H<sub>2</sub> as reference

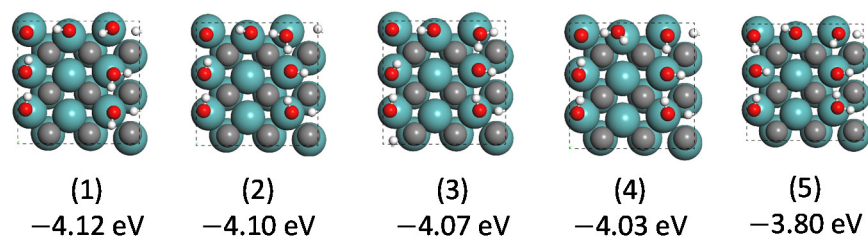

**Fig. S62** Configurations of 5OH\_2H<sub>2</sub>O (mixed 5/9 ML OH and 2/9 ML H<sub>2</sub>O) and surface energies without ZPE correction. Gas phase H<sub>2</sub>O and H<sub>2</sub> as reference

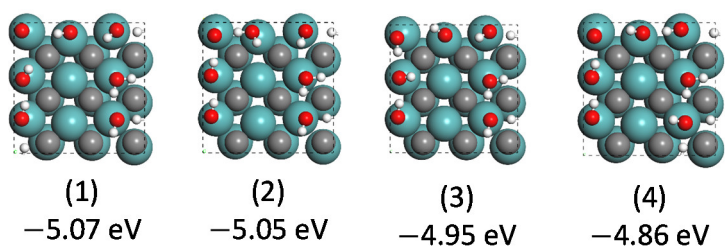

**Fig. S63** Configurations of 4OH\_3H<sub>2</sub>O (mixed 4/9 ML OH and 1/3 ML H<sub>2</sub>O) and surface energies without ZPE correction. Gas phase H<sub>2</sub>O and H<sub>2</sub> as reference

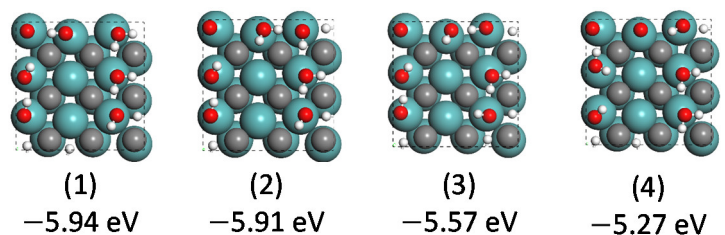

**Fig. S64** Configurations of 3OH\_4H<sub>2</sub>O (mixed 1/3 ML OH and 4/9 ML H<sub>2</sub>O) and surface energies without ZPE correction. Gas phase H<sub>2</sub>O and H<sub>2</sub> as reference

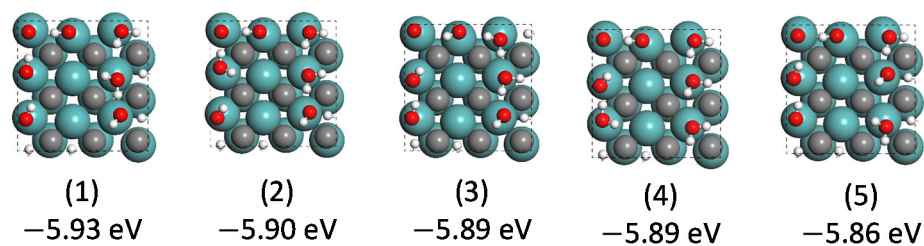

**Fig. S65** Configurations of 2OH\_5H<sub>2</sub>O (mixed 2/9 ML OH and 5/9 ML H<sub>2</sub>O) and surface energies without ZPE correction. Gas phase H<sub>2</sub>O and H<sub>2</sub> as reference

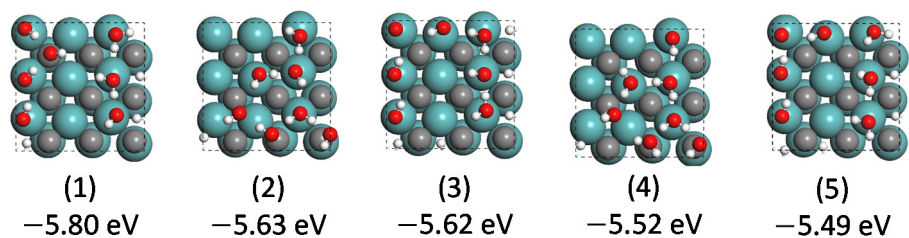

**Fig. S66** Configurations of 1OH\_6H<sub>2</sub>O (mixed 1/9 ML OH and 2/3 ML H<sub>2</sub>O) and surface energies without ZPE correction. Gas phase H<sub>2</sub>O and H<sub>2</sub> as reference

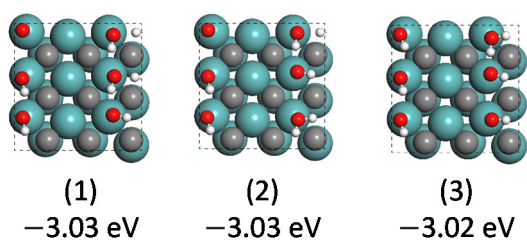

**Fig. S67** Configurations of 5OH\_1H<sub>2</sub>O (mixed 5/9 ML OH and 1/9 ML H<sub>2</sub>O) and surface energies without ZPE correction. Gas phase H<sub>2</sub>O and H<sub>2</sub> as reference

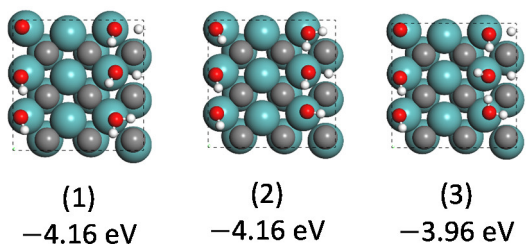

**Fig. S68** Configurations of 4OH\_2H<sub>2</sub>O (mixed 4/9 ML OH and 2/9 ML H<sub>2</sub>O) and surface energies without ZPE correction. Gas phase H<sub>2</sub>O and H<sub>2</sub> as reference

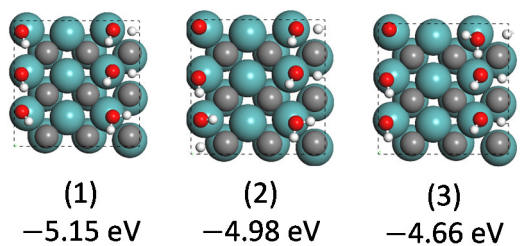

**Fig. S69** Configurations of 3OH\_3H<sub>2</sub>O (mixed 1/3 ML OH and 1/3 ML H<sub>2</sub>O) and surface energies without ZPE correction. Gas phase H<sub>2</sub>O and H<sub>2</sub> as reference

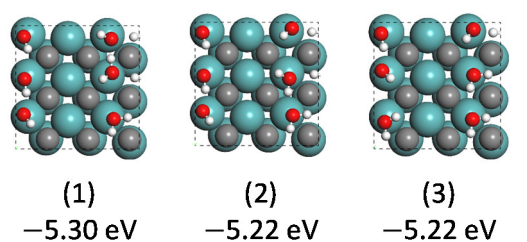

**Fig. S70** Configurations of 2OH\_4H<sub>2</sub>O (mixed 2/9 ML OH and 4/9 ML H<sub>2</sub>O) and surface energies without ZPE correction. Gas phase H<sub>2</sub>O and H<sub>2</sub> as reference

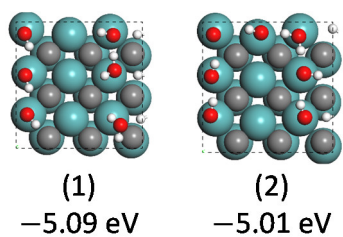

**Fig. S71** Configurations of 10H\_5H<sub>2</sub>O (mixed 1/9 ML OH and 5/9 ML H<sub>2</sub>O) and surface energies without ZPE correction. Gas phase H<sub>2</sub>O and H<sub>2</sub> as reference

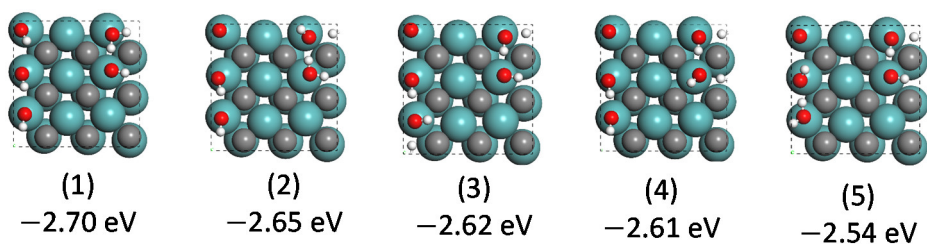

**Fig. S72** Configurations of 4OH\_1H<sub>2</sub>O (mixed 4/9 ML OH and 1/9 ML H<sub>2</sub>O) and surface energies without ZPE correction. Gas phase H<sub>2</sub>O and H<sub>2</sub> as reference

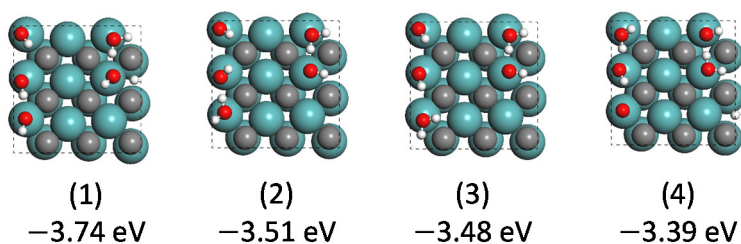

**Fig. S73** Configurations of 3OH\_2H<sub>2</sub>O (mixed 1/3 ML OH and 2/9 ML H<sub>2</sub>O) and surface energies without ZPE correction. Gas phase H<sub>2</sub>O and H<sub>2</sub> as reference

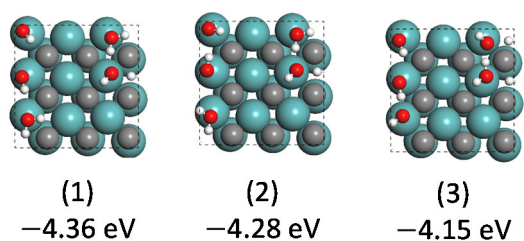

**Fig. S74** Configurations of 2OH\_3H<sub>2</sub>O (mixed 2/9 ML OH and 1/3 ML H<sub>2</sub>O) and surface energies without ZPE correction. Gas phase H<sub>2</sub>O and H<sub>2</sub> as reference

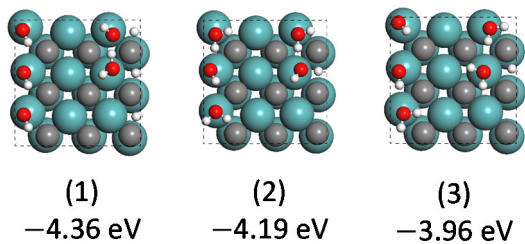

**Fig. S75** Configurations of 1OH\_4H<sub>2</sub>O (mixed 1/9 ML OH and 4/9 ML H<sub>2</sub>O) and surface energies without ZPE correction. Gas phase H<sub>2</sub>O and H<sub>2</sub> as reference

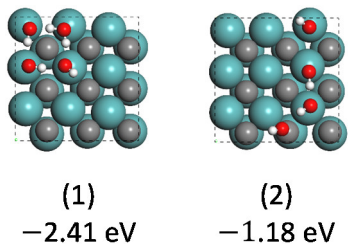

**Fig. S76** Configurations of 3OH\_1H<sub>2</sub>O (mixed 1/3 ML OH and 1/9 ML H<sub>2</sub>O) and surface energies without ZPE correction. Gas phase H<sub>2</sub>O and H<sub>2</sub> as reference

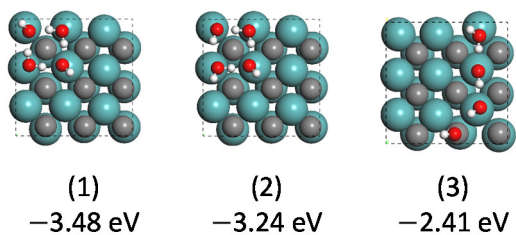

**Fig. S77** Configurations of 2OH\_2H<sub>2</sub>O (mixed 2/9 ML OH and 2/9 ML H<sub>2</sub>O) and surface energies without ZPE correction. Gas phase H<sub>2</sub>O and H<sub>2</sub> as reference

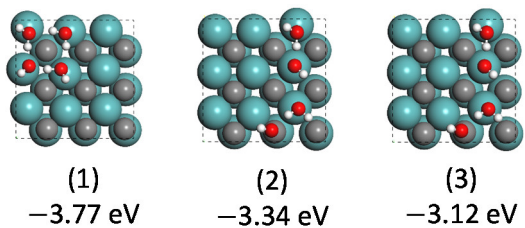

**Fig. S78** Configurations of 1OH\_3H<sub>2</sub>O (mixed 1/9 ML OH and 1/3 ML H<sub>2</sub>O) and surface energies without ZPE correction. Gas phase H<sub>2</sub>O and H<sub>2</sub> as reference



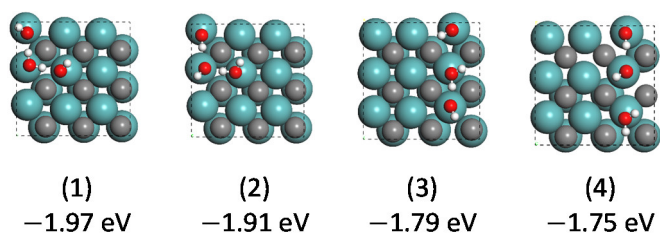

**Fig. S79** Configurations of 2OH\_1H<sub>2</sub>O (mixed 2/9 ML OH and 1/9 ML H<sub>2</sub>O) and surface energies without ZPE correction. Gas phase H<sub>2</sub>O and H<sub>2</sub> as reference

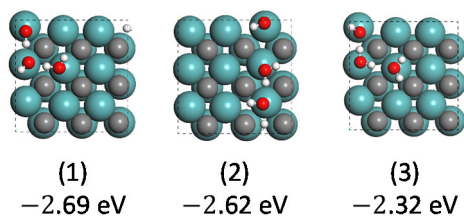

**Fig. S80** Configurations of 1OH\_2H<sub>2</sub>O (mixed 1/9 ML OH and 2/9 ML H<sub>2</sub>O) and surface energies without ZPE correction. Gas phase H<sub>2</sub>O and H<sub>2</sub> as reference

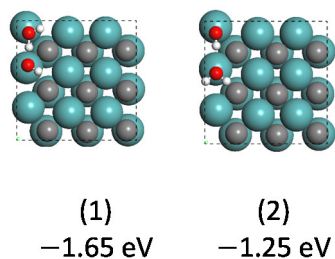

**Fig. S81** Configurations of 1OH\_1H<sub>2</sub>O (mixed 1/9 ML OH and 1/9 ML H<sub>2</sub>O) and surface energies without ZPE correction. Gas phase H<sub>2</sub>O and H<sub>2</sub> as reference

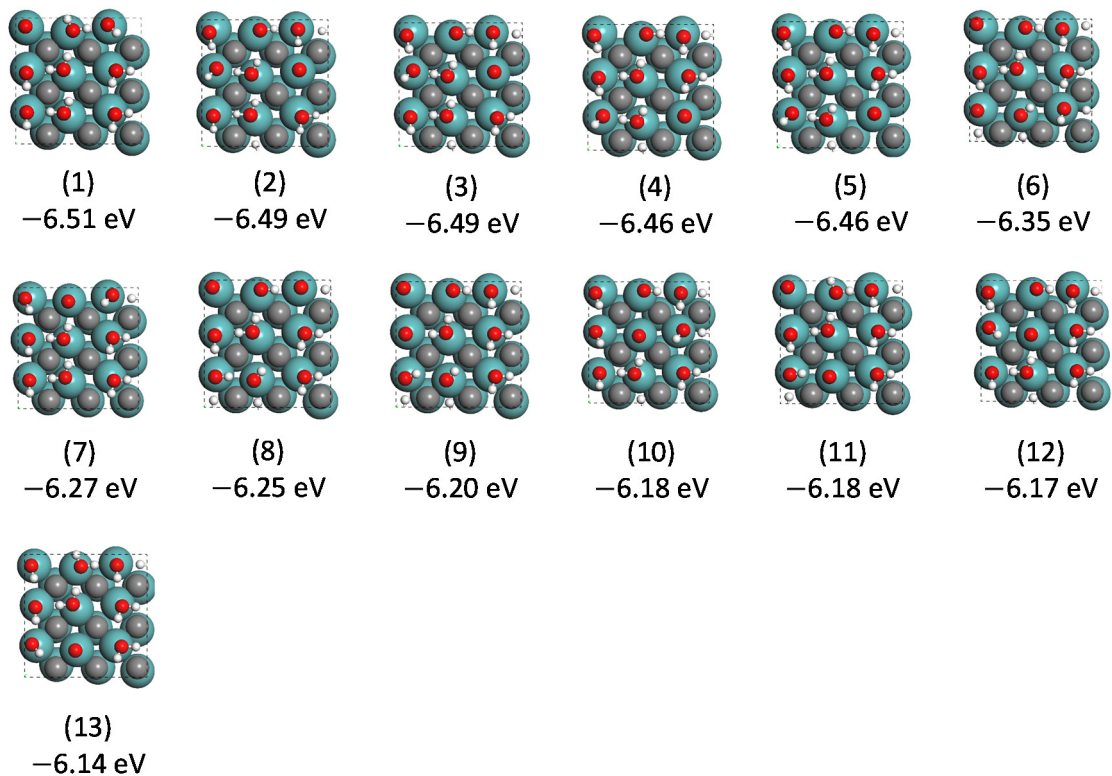

**Fig. S82** Configurations of 3OH\_5H<sub>2</sub>O\_10 (mixed 1/3 ML OH\*, 5/9 ML H<sub>2</sub>O\* and 1/9 ML O\*) and surface energies without ZPE correction. Gas phase H<sub>2</sub>O and H<sub>2</sub> as reference

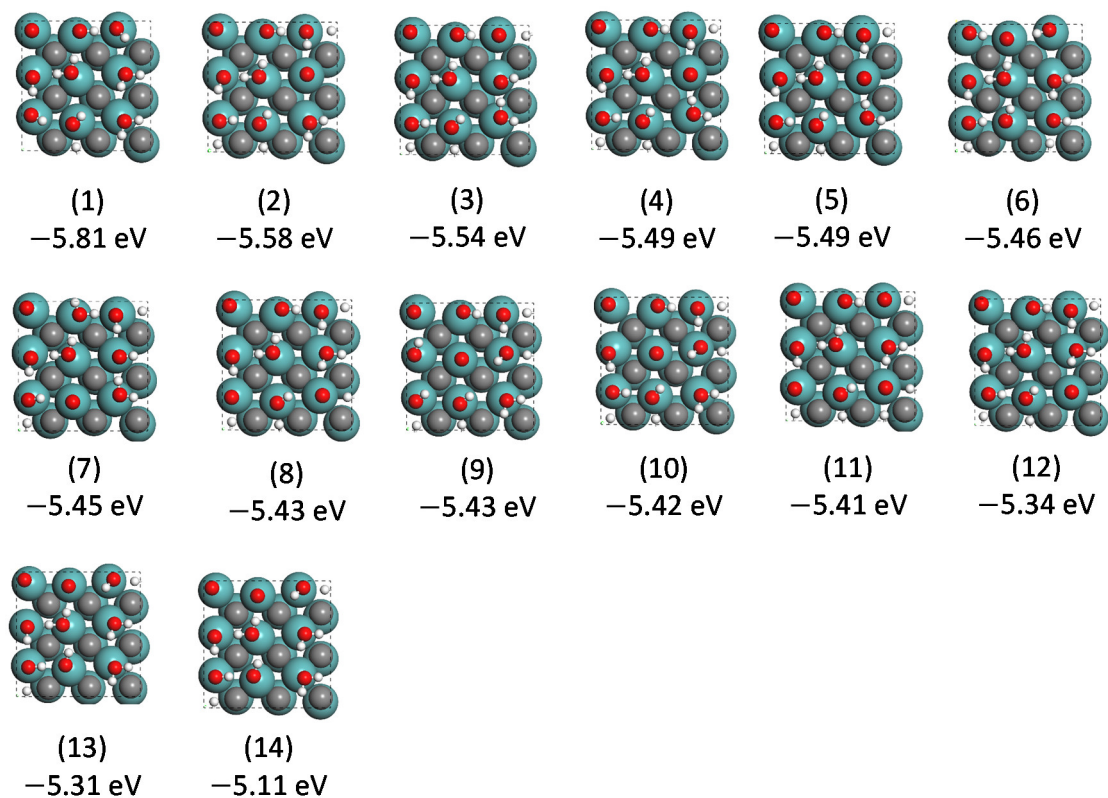

**Fig. S83** Configurations of 4OH\_4H<sub>2</sub>O\_10 (mixed 4/9 ML OH\*, 4/9 ML H<sub>2</sub>O\* and 1/9 ML O\*) and surface energies without ZPE correction. Gas phase H<sub>2</sub>O and H<sub>2</sub> as reference.

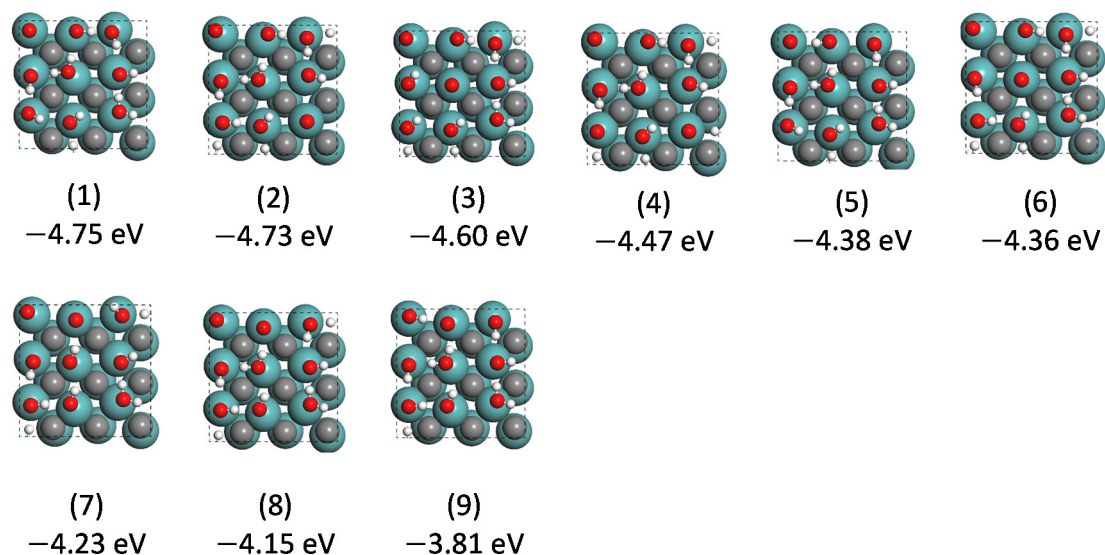

**Fig. S84** Configurations of 5OH\_3H<sub>2</sub>O\_10 (mixed 5/9 ML OH\*, 1/3 ML H<sub>2</sub>O\* and 1/9 ML O\*) and surface energies without ZPE correction. Gas phase H<sub>2</sub>O and H<sub>2</sub> as reference

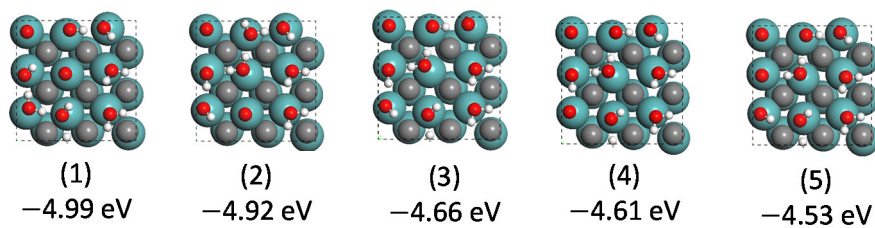

**Fig. S85** Configurations of 3OH\_4H<sub>2</sub>O\_20 (mixed 1/3 ML OH\*, 4/9 ML H<sub>2</sub>O\* and 2/9 ML O\*) and surface energies without ZPE correction. Gas phase H<sub>2</sub>O and H<sub>2</sub> as reference

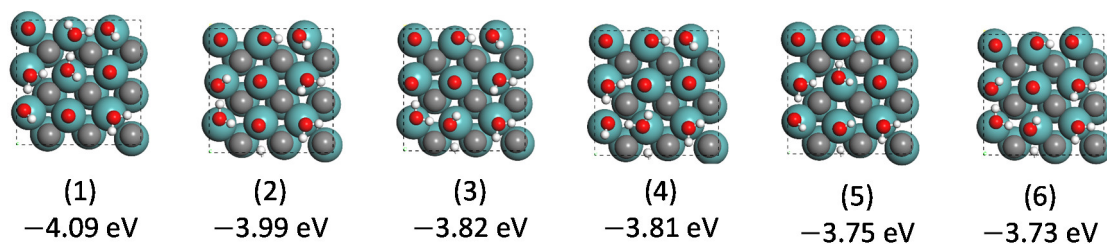

**Fig. S86** Configurations of 2OH\_4H<sub>2</sub>O\_30 (mixed 2/9 ML OH\*, 4/9 ML H<sub>2</sub>O\* and 1/3 ML O\*) and surface energies without ZPE correction. Gas phase H<sub>2</sub>O and H<sub>2</sub> as reference

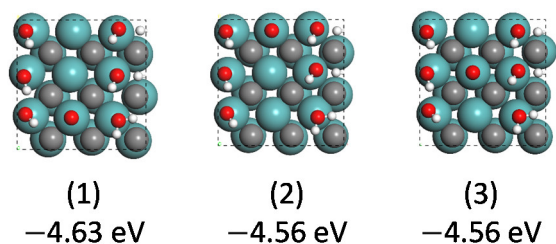

**Fig. S87** Configurations of 3OH\_3H<sub>2</sub>O\_10 (mixed 1/3 ML OH\*, 4/9 ML H<sub>2</sub>O\* and 1/9 ML O\*) and surface energies without ZPE correction. Gas phase H<sub>2</sub>O and H<sub>2</sub> as reference

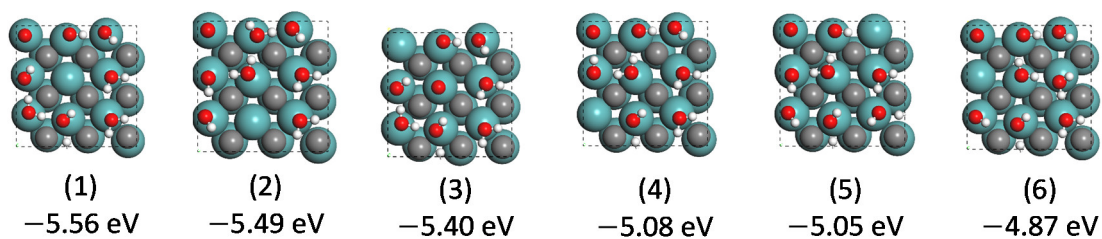

**Fig. S88** Configurations of 3OH\_4H<sub>2</sub>O\_10 (mixed 1/3 ML OH\*, 4/9 ML H<sub>2</sub>O\* and 1/9 ML O\*) and surface energies without ZPE correction. Gas phase H<sub>2</sub>O and H<sub>2</sub> as reference

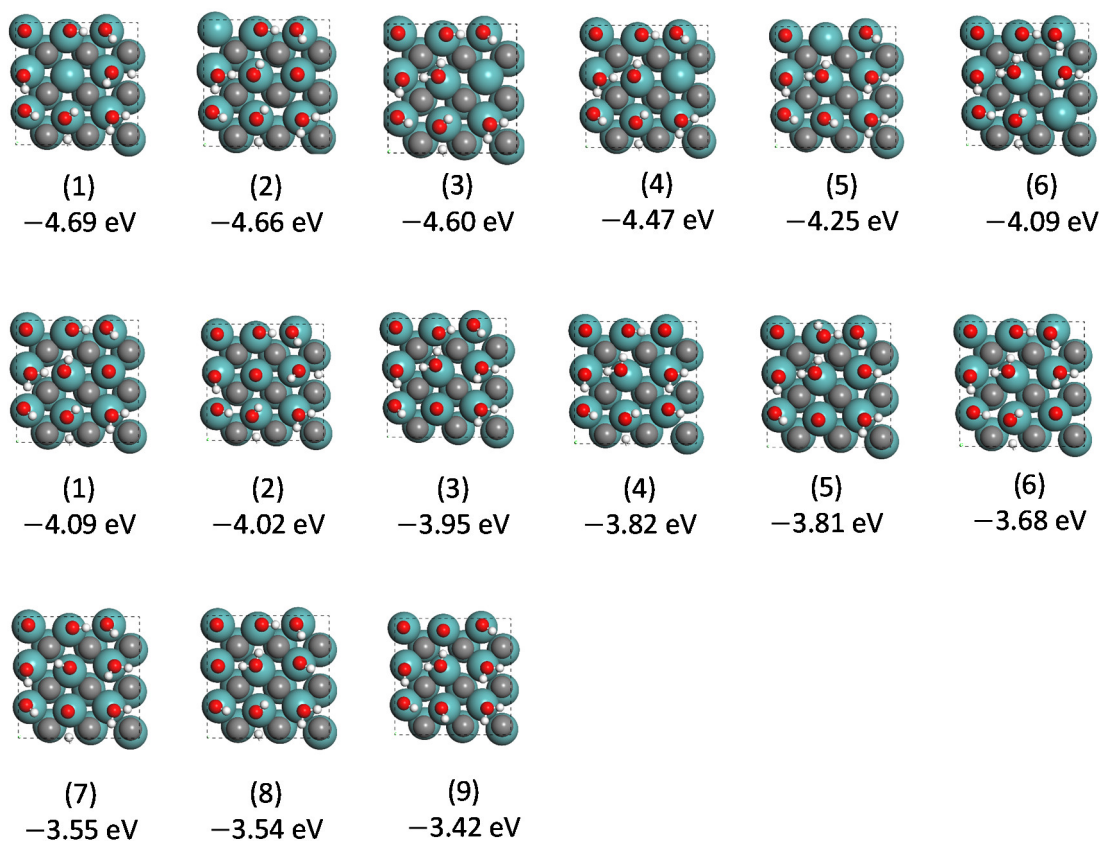

**Fig. S89** Configurations of 4OH\_3H<sub>2</sub>O\_10 (mixed 4/9 ML OH\*, 1/3 ML H<sub>2</sub>O\* and 1/9 ML O\*) and surface energies without ZPE correction. Gas phase H<sub>2</sub>O and H<sub>2</sub> as reference

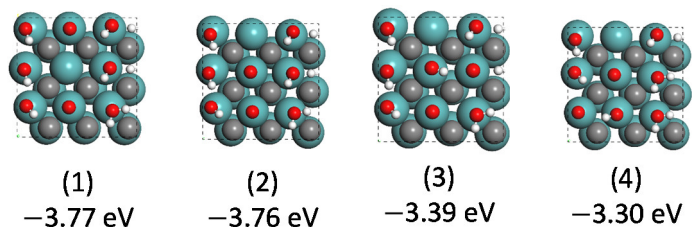

**Fig. S90** Configurations of 3OH\_3H<sub>2</sub>O\_20 (mixed 1/3 ML OH\*, 1/3 ML H<sub>2</sub>O\* and 2/9 ML O\*) and surface energies without ZPE correction. Gas phase H<sub>2</sub>O and H<sub>2</sub> as reference

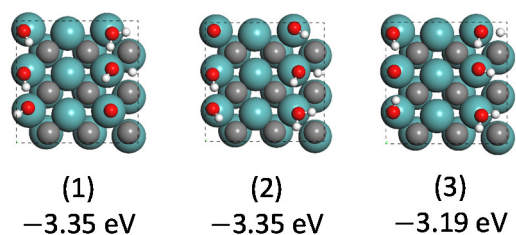

**Fig. S91** Configurations of 3OH\_2H<sub>2</sub>O\_10 (mixed 1/3 ML OH\*, 2/9 ML H<sub>2</sub>O\* and 1/9 ML O\*) and surface energies without ZPE correction. Gas phase H<sub>2</sub>O and H<sub>2</sub> as reference

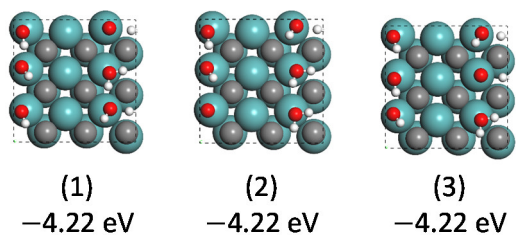

**Fig. S92** Configurations of 2OH\_3H<sub>2</sub>O\_1O (mixed 2/9 ML OH\*, 1/3 ML H<sub>2</sub>O\* and 1/9 ML O\*) and surface energies without ZPE correction. Gas phase H<sub>2</sub>O and H<sub>2</sub> as reference

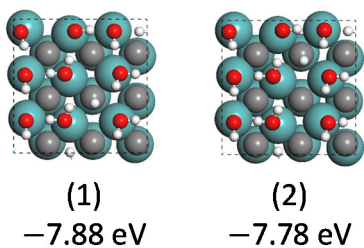

**Fig. S93** Configurations of 3OH\_6H<sub>2</sub>O\_1H (mixed 1/3 ML OH\*, 2/3 ML H<sub>2</sub>O\* and 1/9 ML H\*) and surface energies without ZPE correction. Gas phase H<sub>2</sub>O and H<sub>2</sub> as reference

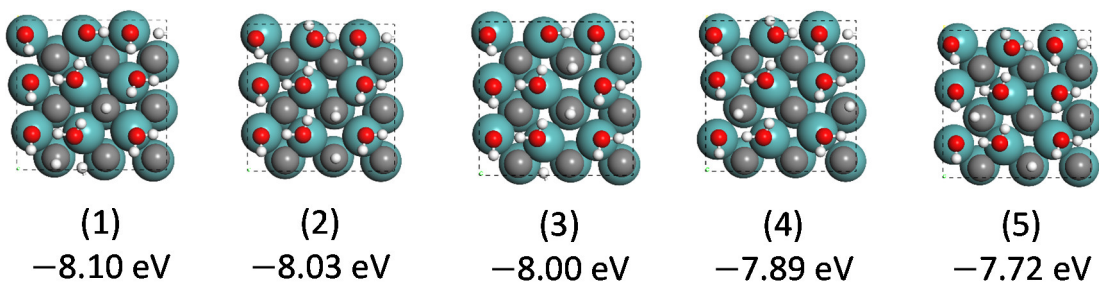

**Fig. S94** Configurations of 3OH\_6H<sub>2</sub>O\_2H (mixed 1/3 ML OH\*, 2/3 ML H<sub>2</sub>O\* and 2/9 ML H\*) and surface energies without ZPE correction. Gas phase H<sub>2</sub>O and H<sub>2</sub> as reference

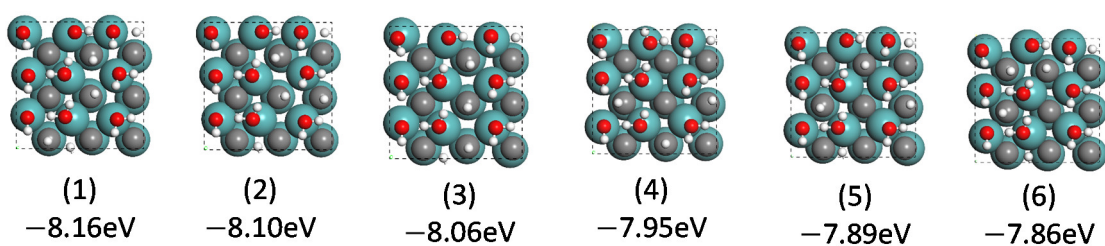

**Fig. S95** Configurations of 3OH\_6H<sub>2</sub>O\_3H (mixed 1/3 ML OH\*, 2/3 ML H<sub>2</sub>O\* and 1/3 ML H\*) and surface energies without ZPE correction. Gas phase H<sub>2</sub>O and H<sub>2</sub> as reference

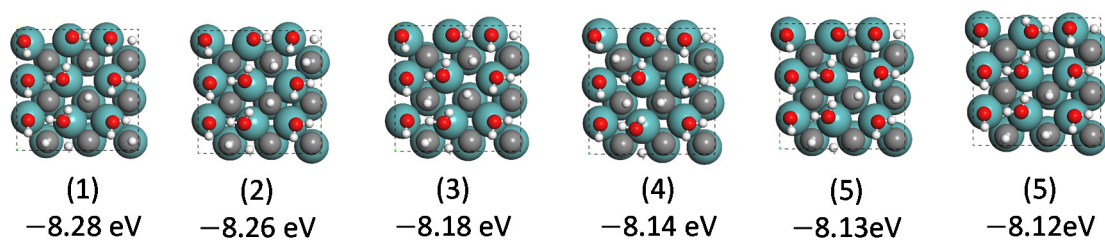

**Fig. S96** Configurations of 3OH\_6H<sub>2</sub>O\_4H (mixed 1/3 ML OH\*, 2/3 ML H<sub>2</sub>O\* and 4/9 ML H\*) and surface energies without ZPE correction. Gas phase H<sub>2</sub>O and H<sub>2</sub> as reference

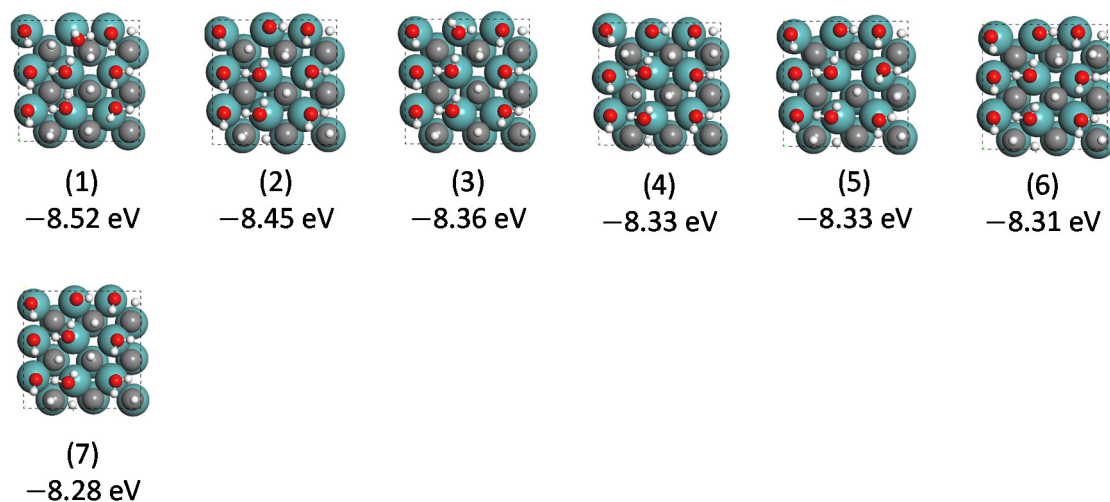

**Fig. S97** Configurations of 3OH\_6H<sub>2</sub>O\_5H (mixed 1/3 ML OH\*, 2/3 ML H<sub>2</sub>O\* and 5/9 ML H\*) and surface energies without ZPE correction. Gas phase H<sub>2</sub>O and H<sub>2</sub> as reference

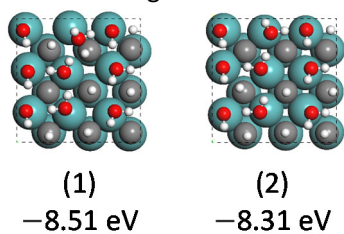

**Fig. S98** Configurations of 3OH\_6H<sub>2</sub>O\_6H (mixed 1/3 ML OH\*, 2/3 ML H<sub>2</sub>O\* and 2/3 ML H\*) and surface energies without ZPE correction. Gas phase H<sub>2</sub>O and H<sub>2</sub> as reference

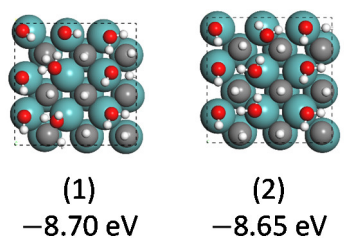

**Fig. S99** Configurations of 3OH\_6H<sub>2</sub>O\_7H (mixed 1/3 ML OH\*, 2/3 ML H<sub>2</sub>O\* and 7/9 ML H\*) and surface energies without ZPE correction. Gas phase H<sub>2</sub>O and H<sub>2</sub> as reference

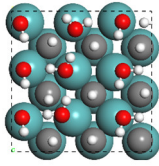

(1)  
-8.59 eV

**Fig. S100** Configurations of 3OH\_6H<sub>2</sub>O\_8H (mixed 1/3 ML OH\*, 2/3 ML H<sub>2</sub>O\* and 8/9 ML H\*) and surface energies without ZPE correction. Gas phase H<sub>2</sub>O and H<sub>2</sub> as reference

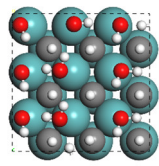

(1)  
-8.89 eV

**Fig. S101** Configurations of 3OH\_6H<sub>2</sub>O\_9H (mixed 1/3 ML OH\*, 2/3 ML H<sub>2</sub>O\* and 1 ML H\*) and surface energies without ZPE correction. Gas phase H<sub>2</sub>O and H<sub>2</sub> as reference

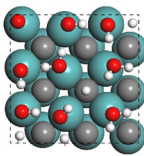

(1)  
-7.37 eV

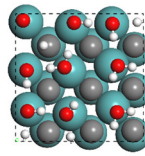

(2)  
-7.32 eV

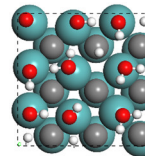

(3)  
-7.28 eV

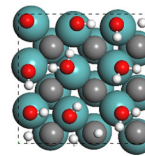

(4)  
-7.27 eV

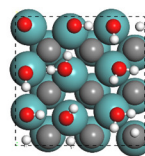

(5)  
-7.20 eV

**Fig. S102** Configurations of 4OH\_5H<sub>2</sub>O\_1H (mixed 4/9 ML OH\*, 5/9 ML H<sub>2</sub>O\* and 1/9 ML H\*) and surface energies without ZPE correction. Gas phase H<sub>2</sub>O and H<sub>2</sub> as reference

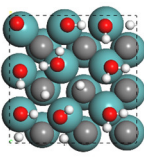

(1)  
-7.84 eV

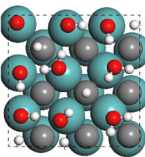

(2)  
-7.74 eV

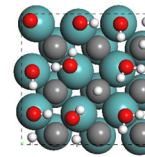

(3)  
-7.65 eV

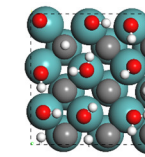

(4)  
-7.56 eV

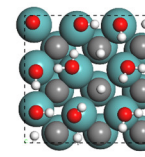

(5)  
-7.53 eV

**Fig. S103** Configurations of 4OH\_5H<sub>2</sub>O\_2H (mixed 4/9 ML OH\*, 5/9 ML H<sub>2</sub>O\* and 2/9 ML H\*) and surface energies without ZPE correction. Gas phase H<sub>2</sub>O and H<sub>2</sub> as reference

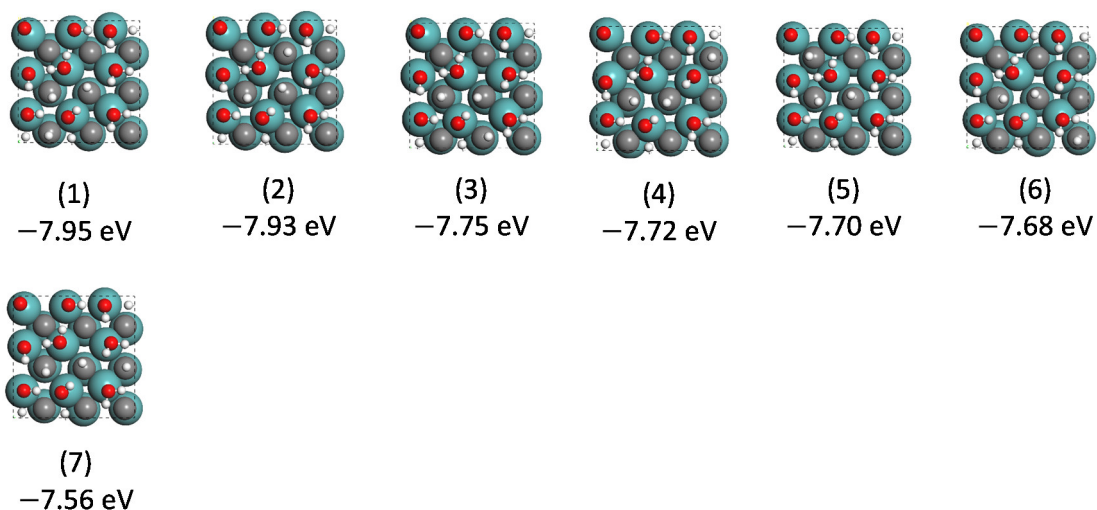

**Fig. S104** Configurations of 4OH\_5H<sub>2</sub>O\_3H (mixed 4/9 ML OH\*, 5/9 ML H<sub>2</sub>O\* and 1/3 ML H\*) and surface energies without ZPE correction. Gas phase H<sub>2</sub>O and H<sub>2</sub> as reference

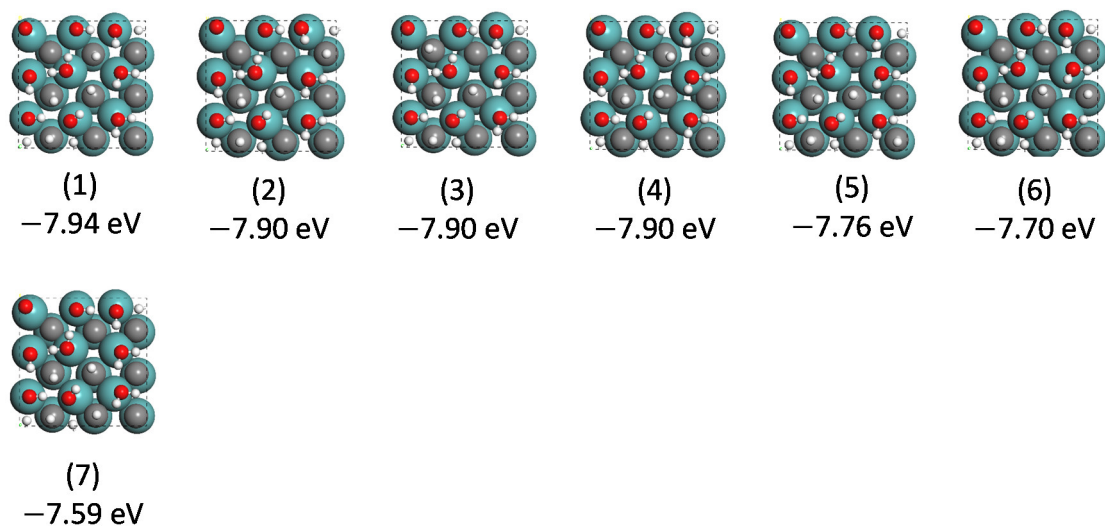

**Fig. S105** Configurations of 4OH\_5H<sub>2</sub>O\_4H (mixed 4/9 ML OH\*, 5/9 ML H<sub>2</sub>O\* and 4/9 ML H\*) and surface energies without ZPE correction. Gas phase H<sub>2</sub>O and H<sub>2</sub> as reference

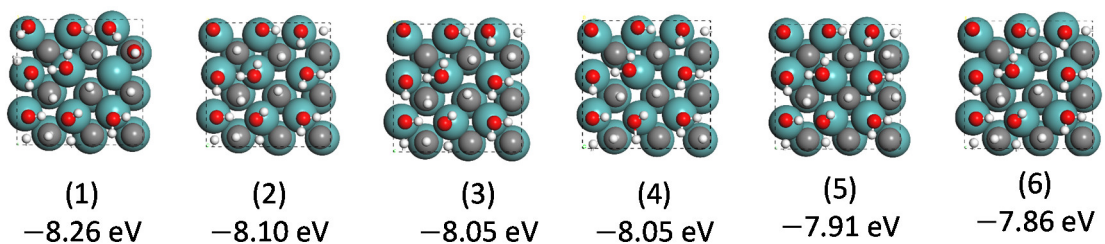

**Fig. S106** Configurations of 4OH\_5H<sub>2</sub>O\_5H (mixed 4/9 ML OH\*, 5/9 ML H<sub>2</sub>O\* and 5/9 ML H\*) and surface energies without ZPE correction. Gas phase H<sub>2</sub>O and H<sub>2</sub> as reference



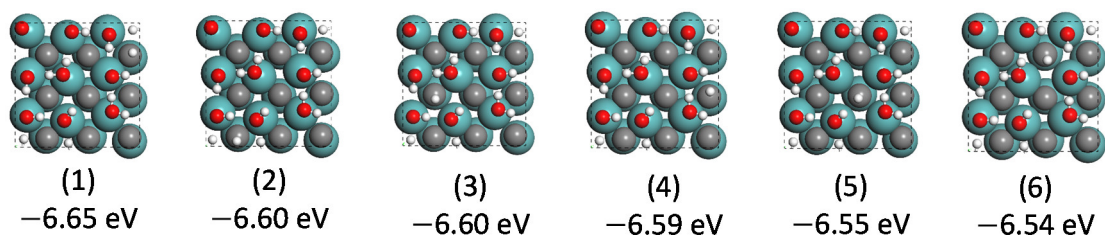

**Fig. S107** Configurations of 5OH\_4H<sub>2</sub>O\_1H (mixed 5/9 ML OH\*, 4/9 ML H<sub>2</sub>O\* and 1/9 ML H\*) and surface energies without ZPE correction. Gas phase H<sub>2</sub>O and H<sub>2</sub> as reference

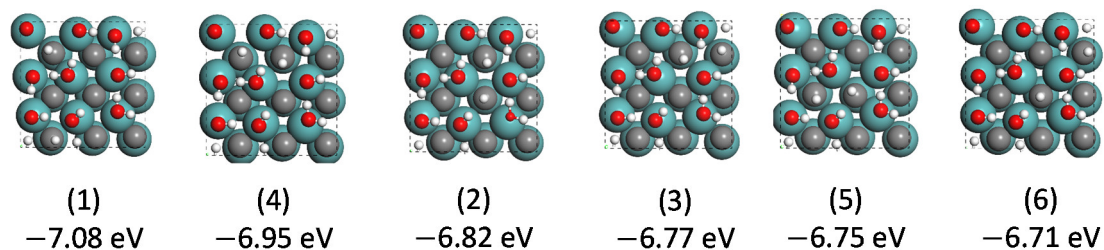

**Fig. S108** Configurations of 5OH\_4H<sub>2</sub>O\_2H (mixed 5/9 ML OH\*, 4/9 ML H<sub>2</sub>O\* and 2/9 ML H\*) and surface energies without ZPE correction. Gas phase H<sub>2</sub>O and H<sub>2</sub> as reference

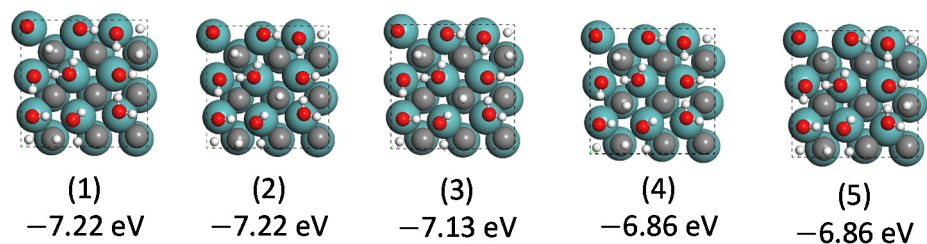

**Fig. S109** Configurations of 5OH\_4H<sub>2</sub>O\_3H (mixed 5/9 ML OH\*, 4/9 ML H<sub>2</sub>O\* and 1/3 ML H\*) and surface energies without ZPE correction. Gas phase H<sub>2</sub>O and H<sub>2</sub> as reference

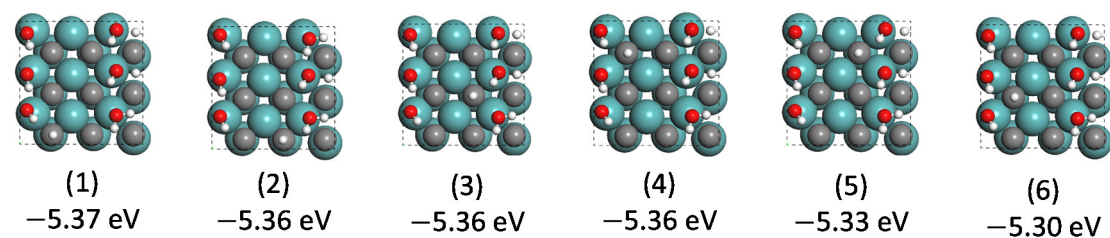

**Fig. S110** Configurations of 3OH\_3H<sub>2</sub>O\_1H (mixed 1/3 ML OH\*, 1/3 ML H<sub>2</sub>O\* and 1/9 ML H\*) and surface energies without ZPE correction. Gas phase H<sub>2</sub>O and H<sub>2</sub> as reference

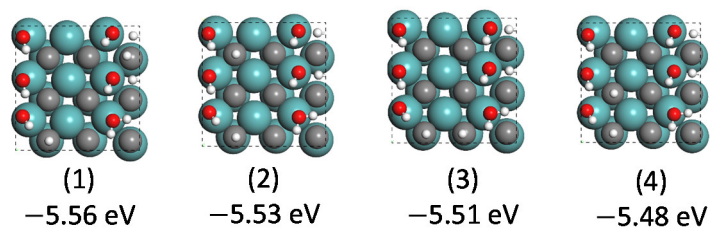

**Fig. S111** Configurations of 3OH\_3H<sub>2</sub>O\_2H (mixed 1/3 ML OH\*, 1/3 ML H<sub>2</sub>O\* and 2/9 ML H\*) and surface energies without ZPE correction. Gas phase H<sub>2</sub>O and H<sub>2</sub> as reference

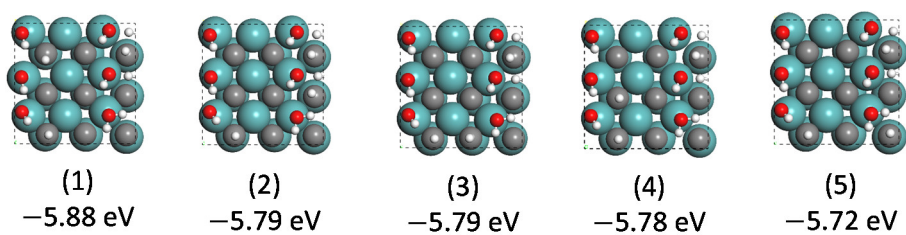

**Fig. S112** Configurations of 3OH\_3H<sub>2</sub>O\_3H (mixed 1/3 ML OH\*, 1/3 ML H<sub>2</sub>O\* and 1/3 ML H\*) and surface energies without ZPE correction. Gas phase H<sub>2</sub>O and H<sub>2</sub> as reference

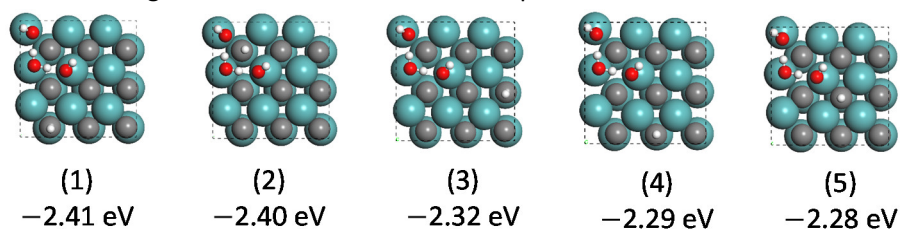

**Fig. S113** Configurations of 2OH\_1H<sub>2</sub>O\_1H (mixed 2/9 ML OH\*, 1/9 ML H<sub>2</sub>O\* and 1/9 ML H\*) and surface energies without ZPE correction. Gas phase H<sub>2</sub>O and H<sub>2</sub> as reference

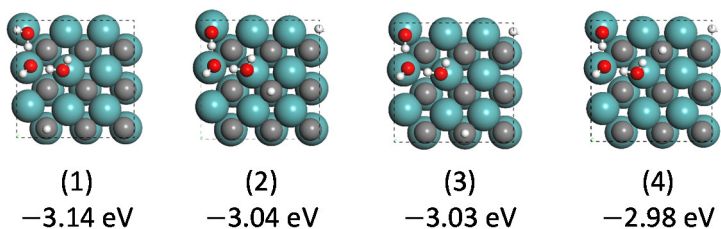

**Fig. S114** Configurations of 1OH\_2H<sub>2</sub>O\_1H (mixed 1/9 ML OH\*, 2/9 ML H<sub>2</sub>O\* and 1/9 ML H\*) and surface energies without ZPE correction. Gas phase H<sub>2</sub>O and H<sub>2</sub> as reference

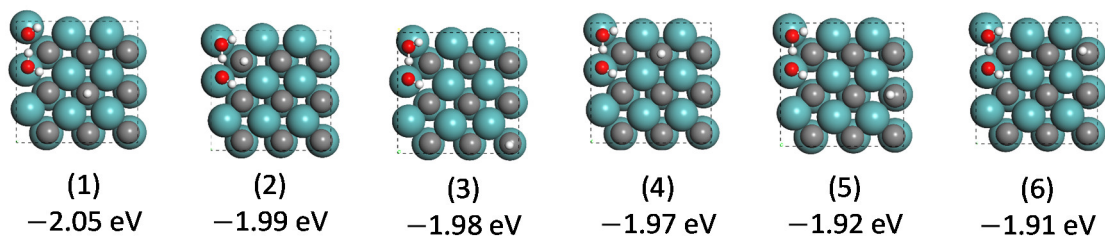

**Fig. S115** Configurations of 1OH\_1H<sub>2</sub>O\_1H (mixed 1/9 ML OH\*, 1/9 ML H<sub>2</sub>O\* and 1/9 ML H\*) and surface energies without ZPE correction. Gas phase H<sub>2</sub>O and H<sub>2</sub> as reference

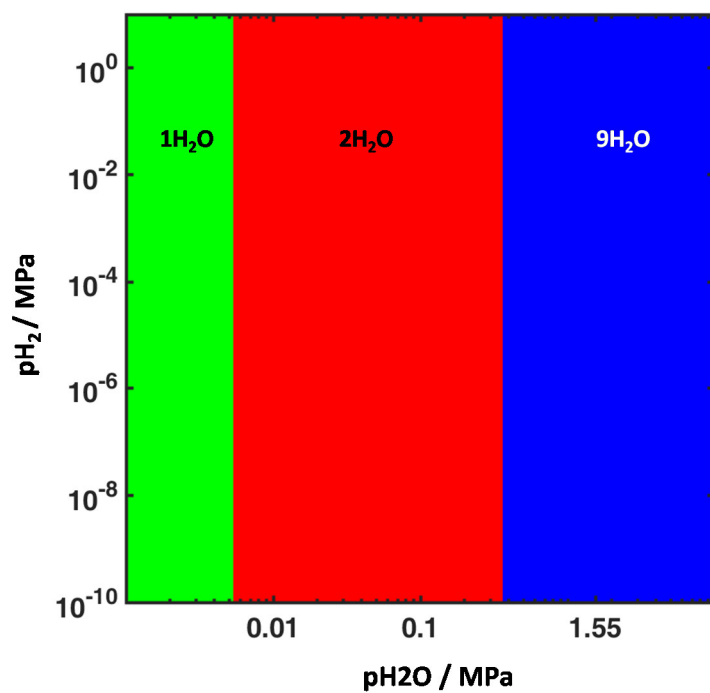

**Fig. S116** Surface phase structures of fcc MoC (001) surface under H<sub>2</sub>O/H<sub>2</sub> environment at 473.15 K (only molecular H<sub>2</sub>O adsorption structures were considered).

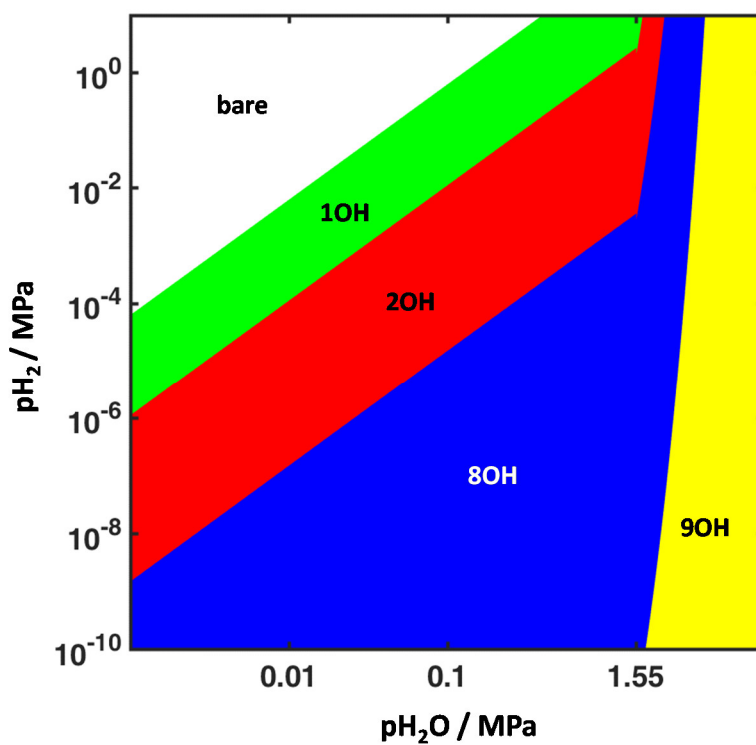

**Fig. S117** Surface phase structures of fcc MoC (001) surface under H<sub>2</sub>O/H<sub>2</sub> environment at 473.15 K (only surface OH\* structures were considered).

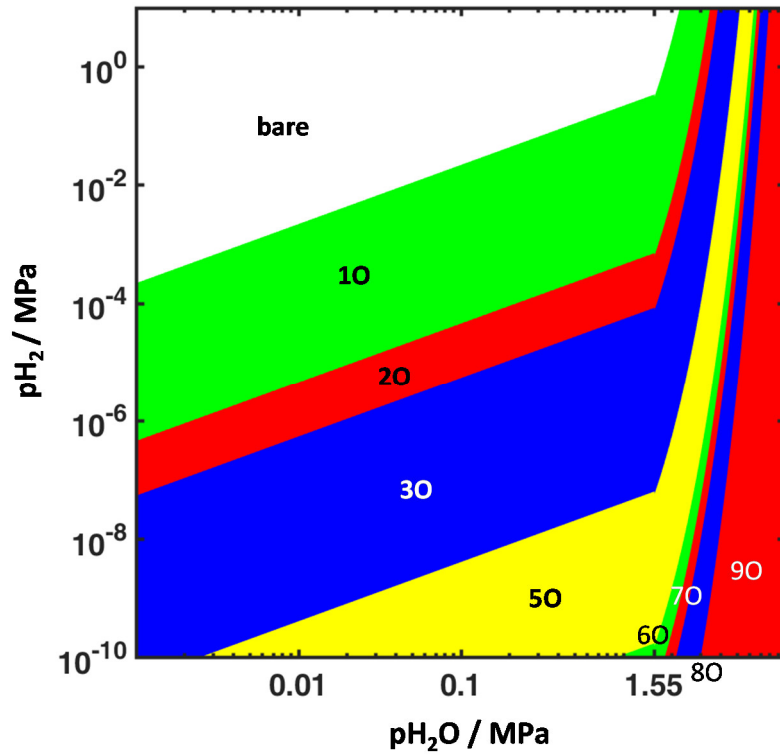

**Fig. S118** Surface phase structures of fcc MoC (001) surface under H<sub>2</sub>O/H<sub>2</sub> environment at 473.15 K (only surface O\* structures were considered).

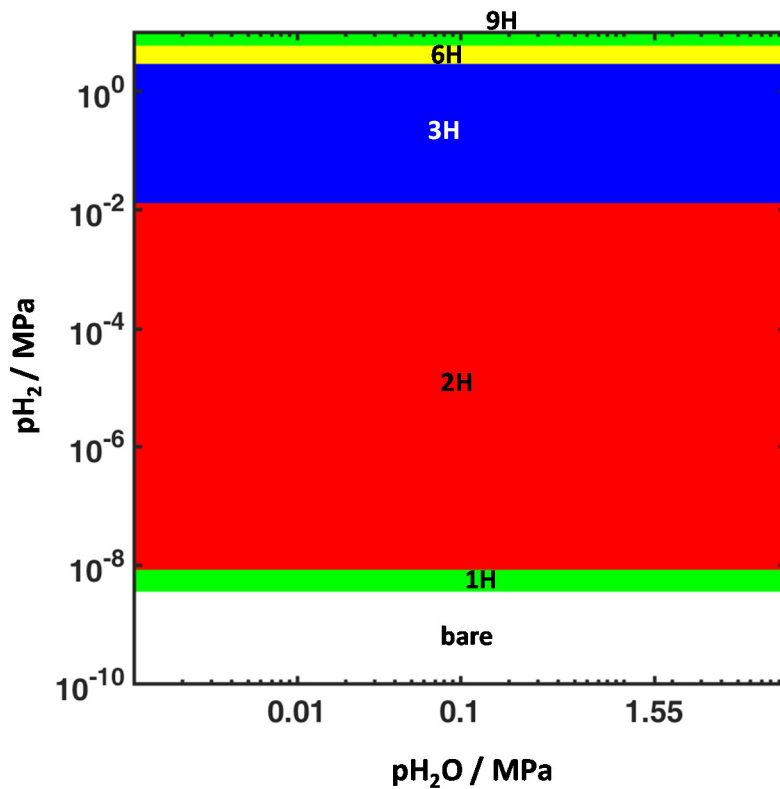

**Fig. S119** Surface phase structures of fcc MoC (001) surface under H<sub>2</sub>O/H<sub>2</sub> environment at 473.15 K (only surface H\* structures were considered).

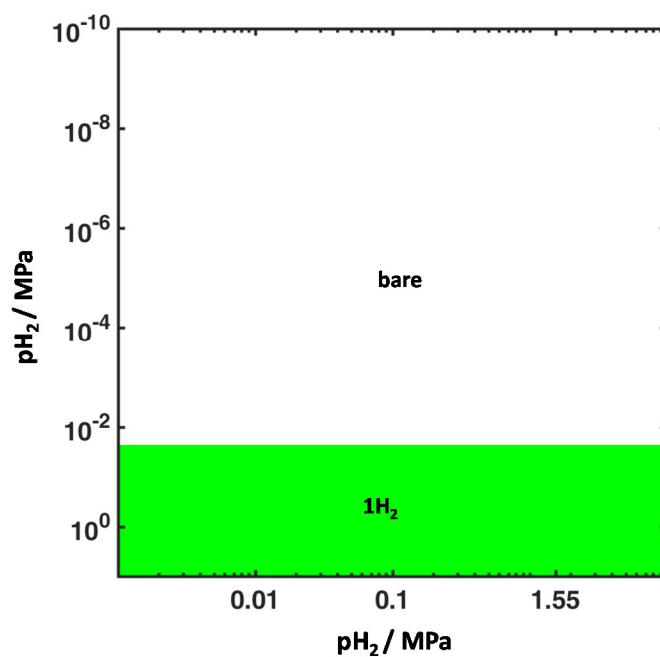

**Fig. S120** Surface phase structures of fcc MoC (001) surface under H<sub>2</sub>O/H<sub>2</sub> environment at 473.15 K (only surface H<sub>2</sub>\* structures were considered).

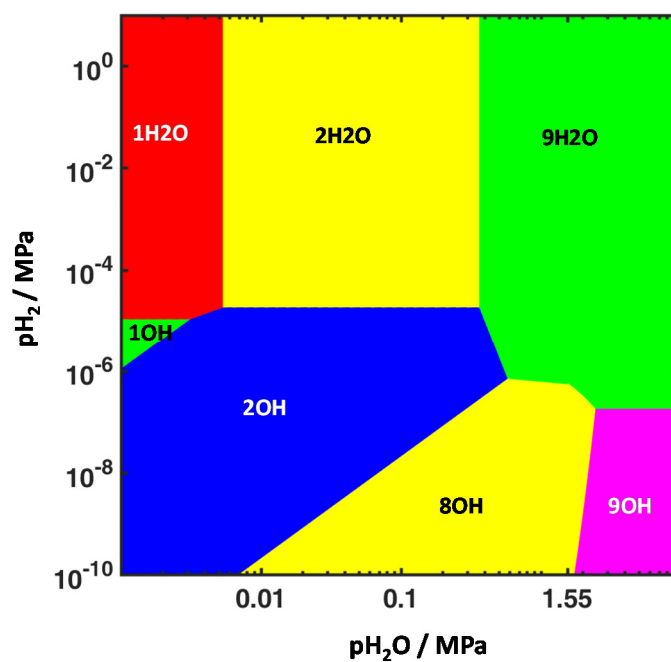

**Fig. S121** Surface phase structures of fcc MoC (001) surface under H<sub>2</sub>O/H<sub>2</sub> environment at 473.15 K (only pure surface H<sub>2</sub>O\* and pure surface OH\* structures were considered without considering their mixtures).

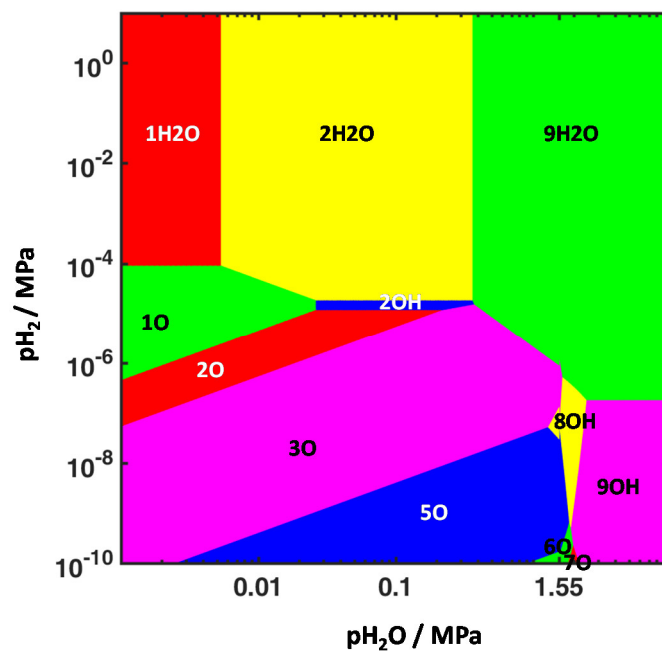

**Fig. S122** Surface phase structures of fcc MoC (001) surface under H<sub>2</sub>O/H<sub>2</sub> environment at 473.15 K (only pure surface H<sub>2</sub>O\*, pure surface OH\* and pure surface O\* structures were considered without considering their mixtures).

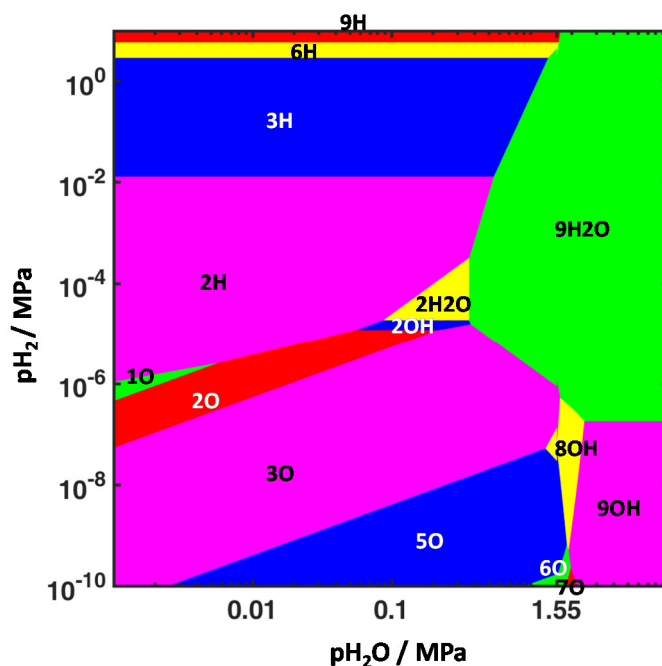

**Fig. S123** Surface phase structures of fcc MoC (001) surface under H<sub>2</sub>O/H<sub>2</sub> environment at 473.15 K (only pure surface H<sub>2</sub>O\*, pure surface OH\*, pure surface O\*, pure surface H\* and pure surface H<sub>2</sub>\* structures were considered without considering their mixtures).

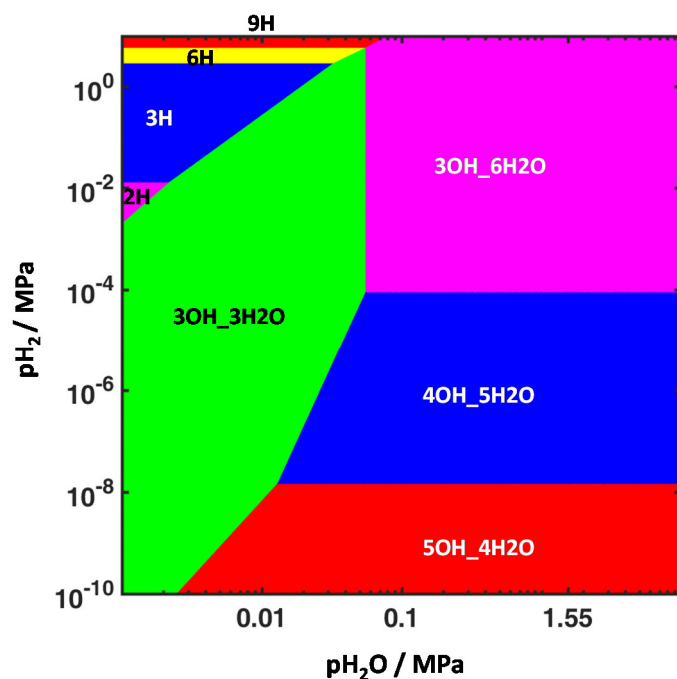

**Fig. S124** Surface phase structures of fcc MoC (001) surface under H<sub>2</sub>O/H<sub>2</sub> environment at 473.15 K (only pure surface H<sub>2</sub>O\*, pure surface OH\*, pure surface O\*, pure surface H\*, pure surface H<sub>2</sub>\* and the mixtures of H<sub>2</sub>O\*/OH\* structures were considered).

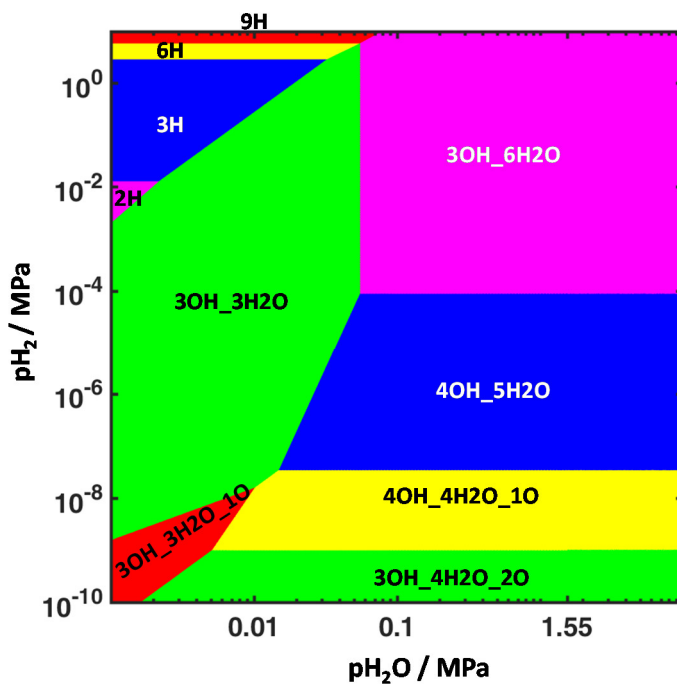

**Fig. S125** Surface phase structures of fcc MoC (001) surface under H<sub>2</sub>O/H<sub>2</sub> environment at 473.15 K (only pure surface H<sub>2</sub>O\*, pure surface OH\*, pure surface O\*, pure surface H\*, pure surface H<sub>2</sub>\*, the mixtures of H<sub>2</sub>O\*/OH\*, H<sub>2</sub>O\*/OH\*/O\*, H<sub>2</sub>O\*/OH\*/H\* structures were considered).

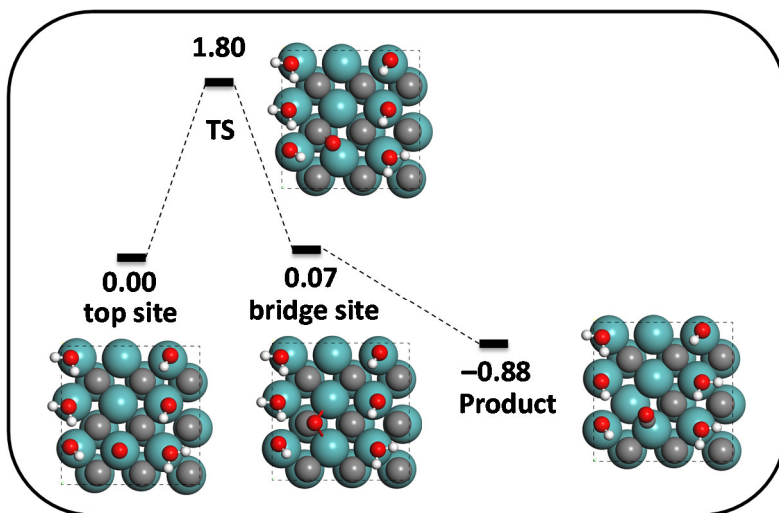

3OH\_3H<sub>2</sub>O\_10

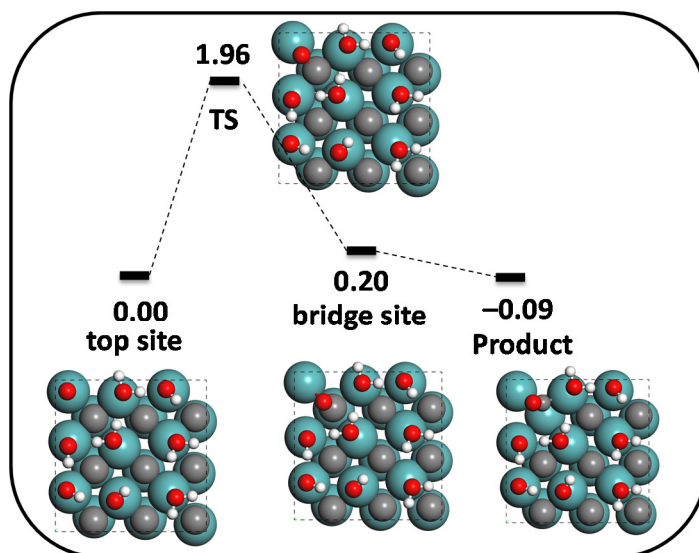

4OH\_4H<sub>2</sub>O\_10

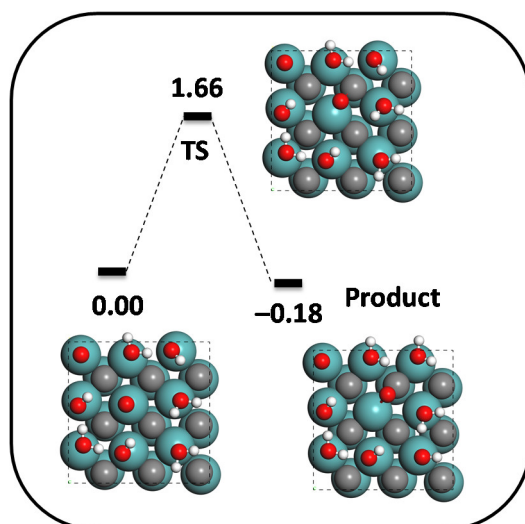

3OH\_4H<sub>2</sub>O\_20



**Fig. S126** The potential energy profiles for the transformation of top site O\* to a bridge site O\* on stable surface phases.

We tried the bridge site configuration on MoC (001) surface by initially placing the O atom at the bridge site and letting it be optimized subsequently. It turned out that the O atom is prone to bond with the surface C site with C-O bond lengths of 1.24 - 1.28 Å indicating a carbon monoxide-like species formation, while the interaction between the Mo and O is rather weak. As we have well confirmed in edition\_1 that “no matter the direct deprotonation pathway or the hydroxyls disproportionation pathway, the initial configuration of generated O\* had the top site configuration, where the O\* bonded with only one Mo site with the Mo-O bond directing perpendicular with the (001) surface.” Thus, the emergence of bridge site O\* should be from the further transformation of top site O\*. Now we provide the potential energy profiles for bridge site O\* formation as shown in the figure below. For example, as for the potential energy profile on the ‘3OH\_3H2O\_1O’ phase structure (the 3OH\_3H2O\_1O structure emerges as a stable phase shown in Figure 7 of the manuscript), the bending of the vertical Mo-O bond in top site O\* will result in a C-O bond formation with length of 1.24 Å. The initial Mo-O bond in the top site O\* totally break up in the transformation process, where the Mo···O distance increased from 1.71 Å in the top site O\* to about 2.70 Å in the bridge site O\* (The Mo···O distance in the molecular H<sub>2</sub>O adsorption on the Mo site is around 2.30 Å). The energy barrier for the above transformation is 1.80 eV which is too high for its happening under methanol steam reforming environment (reaction temperature ≤ 200°). Besides, the bridge site CO\* species is relatively unstable which would move out from the lattice carbon site to form a structure resembling a carbon monoxide molecule adsorbing near the surface carbon vacancy. Similarly, the energy barriers for the further transformation of top site O\* to the bridge site O\* on the other surface phase structures are too high to happen under methanol steam reforming temperatures. Since the formation of bridge site O\* species will hardly happen due to the significant energy barriers (1.7 – 2.0 eV) under methanol steam reforming temperatures and would probably resulted in surface vacancies leading to surface stability problems which was beyond the scope of this manuscript, thus the bridge site O\* is not considered in this manuscript here.

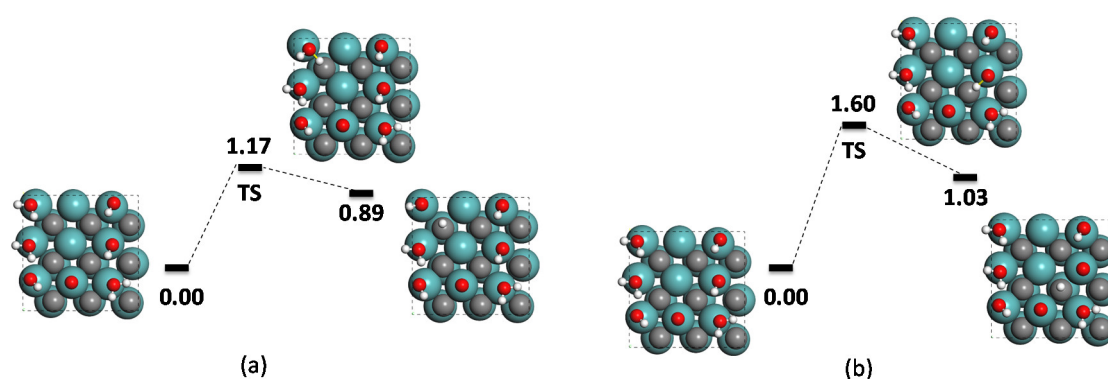

**Fig. S127** The potential energy profiles for the H<sub>2</sub>O dissociation to generate surface OH\* (a) and OH\* direct deprotonation to generate O\* (b) on 3OH\_3H2O\_1O surface structure.

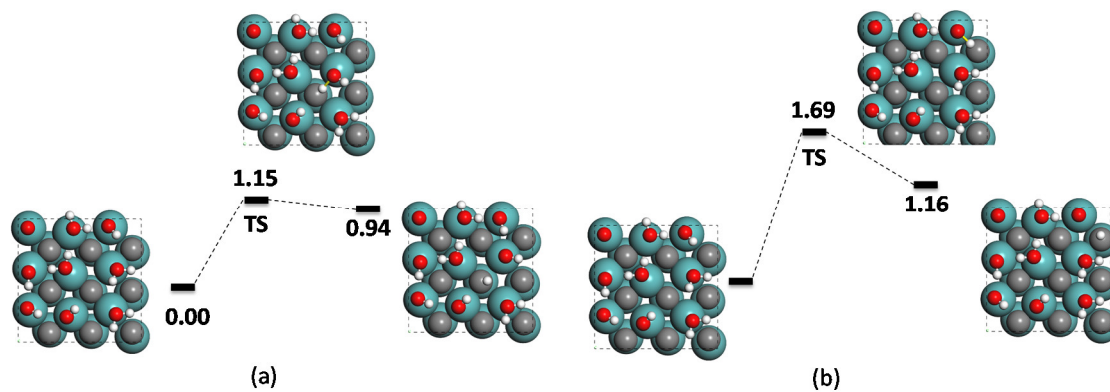

**Fig. S128** The potential energy profiles for the H<sub>2</sub>O dissociation to generate surface OH\* (a) and OH\* direct deprotonation to generate O\* (b) on 4OH\_4H<sub>2</sub>O\_10 surface structure.

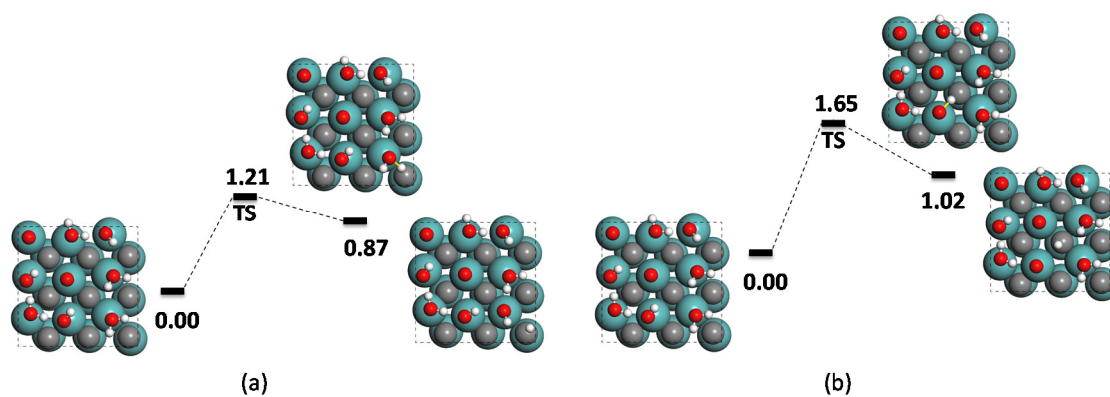

**Fig. S129** The potential energy profiles for the H<sub>2</sub>O dissociation to generate surface OH\* (a) and OH\* direct deprotonation to generate O\* (b) on 3OH\_4H<sub>2</sub>O\_20 surface structure.

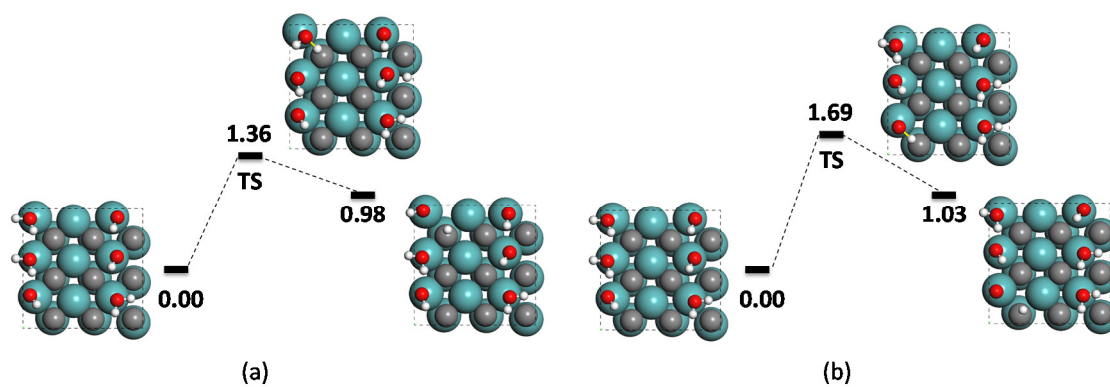

**Fig. S130** The potential energy profiles for the H<sub>2</sub>O dissociation to generate surface OH\* (a) and OH\* direct deprotonation to generate O\* (b) on 3OH\_3H<sub>2</sub>O surface structure.

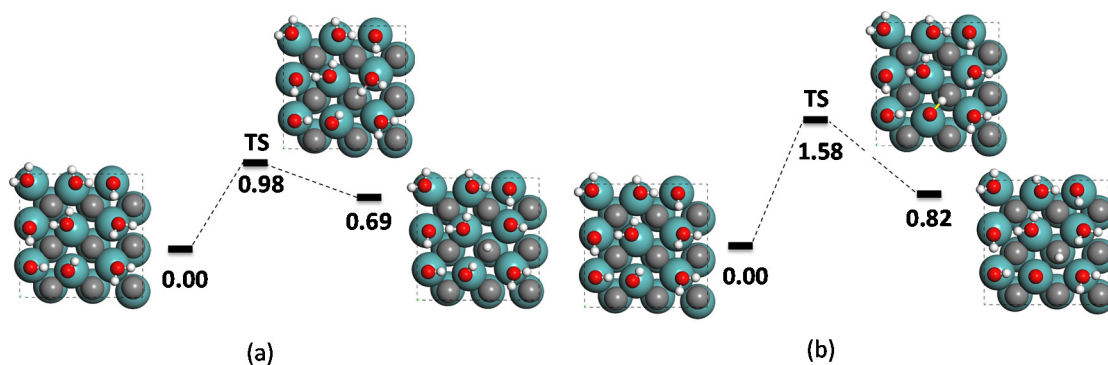

**Fig. S131** The potential energy profiles for the H<sub>2</sub>O dissociation to generate surface OH\* (a) and OH\* direct deprotonation to generate O\* (b) on 4OH\_5H<sub>2</sub>O surface structure.

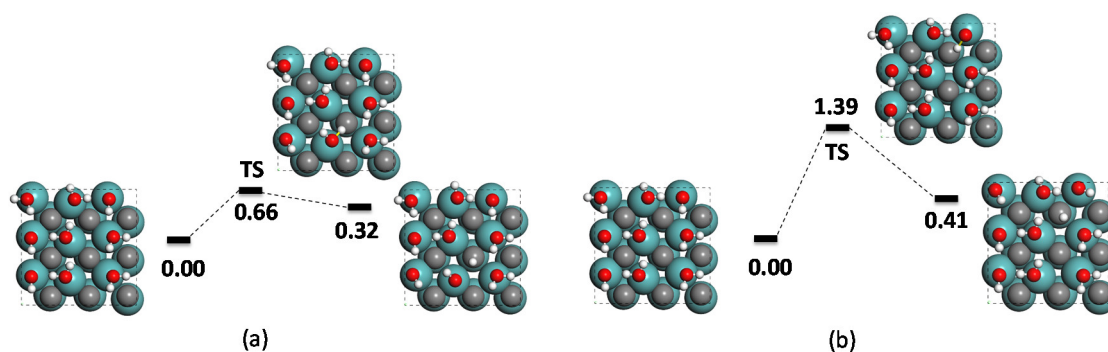

**Fig. S132** The potential energy profiles for the H<sub>2</sub>O dissociation to generate surface OH\* (a) and OH\* direct deprotonation to generate O\* (b) on 3OH\_6H<sub>2</sub>O surface structure.

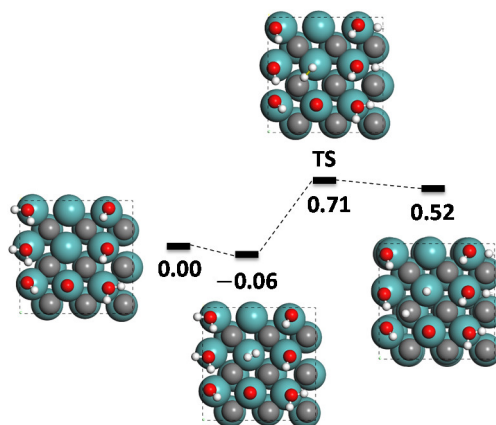

**Fig. S133** The potential energy profiles for the H<sub>2</sub> dissociation to generate surface H\* on 3OH\_3H<sub>2</sub>O\_10 surface structure.

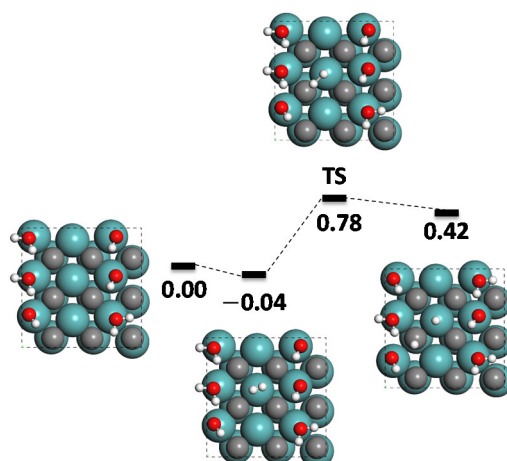

**Fig. S134** The potential energy profiles for the H<sub>2</sub> dissociation to generate surface H\* on 3OH\_3H<sub>2</sub>O surface structure.

**Table S1** Energetic aspects of surface H<sub>2</sub>O\* dissociation with n adsorbing H<sub>2</sub>O\* (n = 1-9),  $\Delta E_{TS,ZPE}^\ddagger$  and  $\Delta E_{TS}^\ddagger$  were energy barriers of H<sub>2</sub>O\* dissociation with or without ZPE correction, respectively;  $\Delta E_{r,ZPE}$  and  $\Delta E_r$  were reaction energies of H<sub>2</sub>O\* dissociation with or without ZPE correction, respectively;  $\sigma_{TS}^i$  were imaginary frequencies of transition states for H<sub>2</sub>O\* dissociation;  $d_{O...H}^\ddagger$  and  $d_{C...H}^\ddagger$  were the lengths of breaking O-H bond of H<sub>2</sub>O\* and lengths of forming C-H bond of C site in the transition state, respectively. Energies were in eV with H<sub>2</sub>O\* adsorption states as reference, distances were in Å and frequencies were in cm<sup>-1</sup>

| $n\text{H}_2\text{O}^* \rightarrow (n-1)\text{H}_2\text{O}^* + \text{OH}^* + \text{H}^*$ |                              |                          |                    |              |                 |                      |                      |
|------------------------------------------------------------------------------------------|------------------------------|--------------------------|--------------------|--------------|-----------------|----------------------|----------------------|
| <i>n</i>                                                                                 | $\Delta E_{TS,ZPE}^\ddagger$ | $\Delta E_{TS}^\ddagger$ | $\Delta E_{r,ZPE}$ | $\Delta E_r$ | $\sigma_{TS}^i$ | $d_{O...H}^\ddagger$ | $d_{C...H}^\ddagger$ |
| 1                                                                                        | 0.22                         | 0.38                     | 0.01               | 0.07         | 1167            | 1.313                | 1.335                |
| 2-a                                                                                      | 0.30                         | 0.42                     | -0.26              | -0.20        | 1291            | 1.257                | 1.416                |
| 2-b                                                                                      | 0.50                         | 0.65                     | 0.28               | 0.34         | 1002            | 1.385                | 1.290                |
| 3-a                                                                                      | 0.32                         | 0.45                     | -0.46              | -0.44        | 1291            | 1.317                | 1.373                |
| 3-b                                                                                      | 0.30                         | 0.43                     | -0.39              | -0.37        | 1296            | 1.297                | 1.390                |
| 3-c                                                                                      | 0.32                         | 0.46                     | -0.47              | -0.45        | 1269            | 1.369                | 1.321                |
| 4-a                                                                                      | 0.48                         | 0.64                     | -0.26              | -0.23        | 1286            | 1.357                | 1.350                |
| 4-b                                                                                      | 0.41                         | 0.55                     | 0.00               | 0.09         | 1239            | 1.351                | 1.348                |
| 5-a                                                                                      | 0.46                         | 0.61                     | -0.08              | 0.01         | 1257            | 1.354                | 1.351                |
| 5-b                                                                                      | 0.50                         | 0.67                     | -0.10              | -0.02        | 1203            | 1.284                | 1.372                |
| 5-c                                                                                      | 0.44                         | 0.63                     | -0.21              | -0.14        | 1192            | 1.310                | 1.349                |
| 6-a                                                                                      | 0.48                         | 0.63                     | 0.01               | 0.09         | 1235            | 1.357                | 1.347                |
| 6-b                                                                                      | 0.49                         | 0.64                     | -0.03              | 0.04         | 1173            | 1.303                | 1.353                |
| 7-a                                                                                      | 0.33                         | 0.48                     | -0.33              | -0.27        | 1325            | 1.293                | 1.388                |
| 7-b                                                                                      | 0.55                         | 0.71                     | -0.05              | 0.01         | 1298            | 1.317                | 1.382                |
| 8-a                                                                                      | 0.69                         | 0.85                     | -0.14              | -0.10        | 1379            | 1.358                | 1.355                |
| 8-b                                                                                      | 0.52                         | 0.67                     | -0.18              | -0.12        | 1357            | 1.327                | 1.363                |
| 9                                                                                        | 0.62                         | 0.76                     | -0.02              | 0.04         | 1214            | 1.307                | 1.356                |

**Table S2** Energetic aspects of surface H<sub>2</sub>O\* dissociation with n adsorbing OH\* (n = 1-8),  $\Delta E_{TS,ZPE}^\ddagger$  and  $\Delta E_{TS}^\ddagger$  were energy barriers of H<sub>2</sub>O\* dissociation with or without ZPE correction, respectively;

$\Delta E_{r,ZPE}$  and  $\Delta E_r$  were reaction energies of  $\text{H}_2\text{O}^*$  dissociation with or without ZPE correction, respectively;  $\sigma_{TS}^i$  were imaginary frequencies of transition states for  $\text{H}_2\text{O}^*$  dissociation;  $d_{\text{O}\cdots\text{H}}^\ddagger$  and  $d_{\text{C}\cdots\text{H}}^\ddagger$  were the lengths of breaking O-H bond of  $\text{H}_2\text{O}^*$  and lengths of forming C-H bond of C site in the transition state, respectively. Energies were in eV with  $\text{H}_2\text{O}^*$  adsorption states as reference, distances were in Å and frequencies were in  $\text{cm}^{-1}$

| $n\text{HO}^* + \text{H}_2\text{O}^* \rightarrow (n+1)\text{HO}^* + \text{H}^*$ |                              |                          |                    |              |                 |                                       |                                       |
|---------------------------------------------------------------------------------|------------------------------|--------------------------|--------------------|--------------|-----------------|---------------------------------------|---------------------------------------|
| $n$                                                                             | $\Delta E_{TS,ZPE}^\ddagger$ | $\Delta E_{TS}^\ddagger$ | $\Delta E_{r,ZPE}$ | $\Delta E_r$ | $\sigma_{TS}^i$ | $d_{\text{O}\cdots\text{H}}^\ddagger$ | $d_{\text{C}\cdots\text{H}}^\ddagger$ |
| 1-a                                                                             | 1.00                         | 1.15                     | 0.71               | 0.78         | 1219            | 1.354                                 | 1.321                                 |
| 1-b                                                                             | 0.43                         | 0.58                     | 0.19               | 0.23         | 1020            | 1.345                                 | 1.295                                 |
| 1-c                                                                             | 0.35                         | 0.49                     | 0.11               | 0.19         | 1169            | 1.356                                 | 1.325                                 |
| 2-a                                                                             | 1.28                         | 1.45                     | 0.77               | 0.83         | 1232            | 1.361                                 | 1.311                                 |
| 2-b                                                                             | 0.72                         | 0.86                     | 0.33               | 0.36         | 985             | 1.405                                 | 1.267                                 |
| 2-c                                                                             | 0.46                         | 0.60                     | 0.15               | 0.18         | 1210            | 1.330                                 | 1.334                                 |
| 3-a                                                                             | 1.02                         | 1.17                     | 0.75               | 0.77         | 1172            | 1.368                                 | 1.301                                 |
| 3-b                                                                             | 0.96                         | 1.11                     | 0.73               | 0.79         | 1074            | 1.335                                 | 1.302                                 |
| 3-c                                                                             | 0.68                         | 0.83                     | 0.21               | 0.26         | 1213            | 1.377                                 | 1.315                                 |
| 4-a                                                                             | 1.53                         | 1.69                     | 0.91               | 0.98         | 897             | 1.468                                 | 1.250                                 |
| 4-b                                                                             | 0.96                         | 1.14                     | 0.87               | 0.95         | 853             | 1.458                                 | 1.260                                 |
| 4-c                                                                             | 0.82                         | 0.99                     | 0.61               | 0.68         | 1175            | 1.371                                 | 1.308                                 |
| 5-a                                                                             | 1.41                         | 1.57                     | 1.13               | 1.19         | 1059            | 1.429                                 | 1.272                                 |
| 5-b                                                                             | 1.06                         | 1.23                     | 0.95               | 1.02         | 851             | 1.464                                 | 1.260                                 |
| 5-c                                                                             | 1.02                         | 1.19                     | 0.77               | 0.85         | 914             | 1.442                                 | 1.267                                 |
| 6-a                                                                             | 1.67                         | 1.86                     | 1.18               | 1.27         | 1212            | 1.378                                 | 1.301                                 |
| 6-b                                                                             | 1.63                         | 1.80                     | 1.32               | 1.39         | 665             | 1.526                                 | 1.231                                 |
| 7                                                                               | 1.71                         | 1.87                     | 1.43               | 1.52         | 821             | 1.486                                 | 1.231                                 |
| 8                                                                               | 1.35                         | 1.53                     | 1.41               | 1.49         | 942             | 1.444                                 | 1.266                                 |

**Table S3** Reaction rate constants  $k$  ( $s^{-1}$ ) of elementary reactions at different surface coverage at 473.15 K; the reaction pathway with lowest energy barrier at each coverage was selected. (In order to cancel the error with low frequency mode in calculating the vibrational partition functions, frequencies below  $200\text{ cm}^{-1}$  were shifted to  $200\text{ cm}^{-1}$ )

| $n$ | surface OH* formation   |                      | surface O* formation                  |                                      |                      | surface H* formation |                   |
|-----|-------------------------|----------------------|---------------------------------------|--------------------------------------|----------------------|----------------------|-------------------|
|     | $n\text{H}_2\text{O}^*$ | $n\text{OH}^*$       | $n\text{OH}^*_{\text{deprotonation}}$ | $n\text{OH}^*_{\text{condensation}}$ |                      | $n\text{H}_2^*$      | $n\text{H}^*$     |
|     |                         |                      |                                       | $r_{\text{forward}}$                 | $r_{\text{reverse}}$ |                      |                   |
| 1   | $1.4 \times 10^{10}$    | $3.9 \times 10^8$    | $8.7 \times 10^4$                     | —                                    | —                    | $1.8 \times 10^{10}$ | $4.7 \times 10^9$ |
| 2   | $1.5 \times 10^9$       | $2.4 \times 10^7$    | $1.2 \times 10^2$                     | $6.3 \times 10^{12}$                 | $5.6 \times 10^{11}$ | $5.3 \times 10^7$    | $8.6 \times 10^5$ |
| 3   | $1.6 \times 10^9$       | $1.4 \times 10^5$    | $3.6 \times 10^{-2}$                  | $6.0 \times 10^{12}$                 | $4.4 \times 10^{12}$ | $1.6 \times 10^6$    | $1.8 \times 10^3$ |
| 4   | $1.4 \times 10^8$       | $5.5 \times 10^3$    | $4.9 \times 10^{-2}$                  | $6.9 \times 10^{12}$                 | $4.1 \times 10^{10}$ | $4.7 \times 10^6$    | $3.0 \times 10^4$ |
| 5   | $8.8 \times 10^7$       | $4.1 \times 10^1$    | $9.0 \times 10^{-3}$                  | $8.0 \times 10^{12}$                 | $1.6 \times 10^{11}$ | $1.2 \times 10^7$    | $1.9 \times 10^4$ |
| 6   | $2.9 \times 10^7$       | $3.7 \times 10^{-5}$ | $2.1 \times 10^{-7}$                  | $2.4 \times 10^{12}$                 | $1.0 \times 10^{11}$ | $2.5 \times 10^7$    | $1.9 \times 10^1$ |
| 7   | $9.2 \times 10^8$       | $3.7 \times 10^{-6}$ | $3.3 \times 10^{-5}$                  | $6.8 \times 10^{12}$                 | $1.9 \times 10^{10}$ | $9.9 \times 10^6$    | $5.8 \times 10^5$ |
| 8   | $2.1 \times 10^7$       | $1.3 \times 10^{-2}$ | $2.3 \times 10^{-4}$                  | $8.9 \times 10^{12}$                 | $3.6 \times 10^9$    | $2.6 \times 10^7$    | $8.8 \times 10^4$ |
| 9   | $1.6 \times 10^6$       | —                    | $9.1 \times 10^{-4}$                  | $4.3 \times 10^{12}$                 | $9.2 \times 10^9$    | $1.6 \times 10^7$    | —                 |

---

1  
2  
3  
4  
5  
6  
7  
8  
9  
10  
11  
12  
13  
14  
15  
16  
17  
18  
19  
20  
21  
22  
23  
24  
25  
26  
27  
28  
29  
30  
31  
32  
33  
34  
35  
36

---

37  
38  
39  
40  
41  
42  
43  
44  
45  
46  
47  
48  
49  
50  
51  
52  
53  
54  
55  
56  
57  
58  
59  
60  
61  
62  
63  
64  
65  
66  
67  
68  
69  
70  
71  
72  
73  
74  
75  
76  
77  
78  
79  
80  
81  
82  
83  
84  
85  
86  
87  
88  
89  
90



---

91  
92  
93  
94  
95  
96  
97  
98  
99  
100  
101  
102  
103  
104  
105  
106  
107  
108  
109  
110  
111  
112  
113  
114  
115  
116  
117  
118  
119  
120  
121  
122  
123  
124  
125  
126  
127  
128  
129  
130  
131  
132  
133  
134
